# Supplementary material for: Solvent-free synthesis of trisphenols as starting precursors for the synthesis of calix[4]arenes using sulfonated multi-walled carbon nanotubes
Source: Royal Society of Chemistry journal article supplement (doi:10.1039/c5nj03136b), 2016-01-01
Supplement: c5nj03136b1.pdf [file c5nj03136b1.pdf]

**Supplementary information for**

**Solvent-free Synthesis of Trisphenols as a Starting Precursor for Synthesis of  
Calix[4]arenes Using Sulfonated Multi-Walled Carbon Nanotubes**

Reza Fareghi-Alamdari\*; Mohsen Golestanzadeh; Negar Zekri

College of Chemistry and Chemical Engineering, Malek-Ashtar University of

Technology, Tehran, 16765-3454, I. R. Iran

Email: reza\_fareghi@yahoo.com, mohsengolestanzadeh@yahoo.com

Tel: +982122970277, Fax: +982122970195

## Contents:

|                                                                                                                                 |     |
|---------------------------------------------------------------------------------------------------------------------------------|-----|
| Figure S1, SEM images of (A): MWCNTs (B): SO <sub>3</sub> H@MWCNTs; TEM images of (C): MWCNTs (D):SO <sub>3</sub> H@MWCNTs..... | S4  |
| Figure S2, Comparison between the FT-IR spectra of (A): MWCNTs (B): COOH@MWCNTs (C): SO <sub>3</sub> H@MWCNTs.....              | S5  |
| Figure S3, XRD pattern of SO <sub>3</sub> H@MWCNTs.....                                                                         | S5  |
| Figure S4, Raman spectra of (A): MWCNTs (B): COOH@MWCNTs (C): SO <sub>3</sub> H@MWCNTs.....                                     | S6  |
| Figure S5, TGA curve of (A): COOH@MWCNTs (B): SO <sub>3</sub> H@MWCNTs.....                                                     | S7  |
| Acidity measurement of the catalysts.....                                                                                       | S8  |
| Copy of <sup>1</sup> H NMR and <sup>13</sup> C NMR of synthetic compounds.....                                                  | S10 |

### ***Microscopic and spectroscopic characterization of prepared catalyst***

The SO<sub>3</sub>H@MWCNTs catalyst was characterized by the following techniques: Scanning Electron Microscopy (SEM) (Fig. S1a and S1b); Transmission Electron Microscopy (TEM) (Fig. S1c and S1d); FT-IR spectroscopy (Fig. S2); Powder X-ray Diffraction (XRD) (Fig. S3); Raman Spectroscopy (Fig. S4); and Thermal Gravimetric Analysis (TGA) (Fig. S5).

### ***SEM and TEM results***

SEM images of MWCNTs and SO<sub>3</sub>H@MWCNTs are shown in Figure S1a and S1b respectively. The SEM images revealed that after applied strategy for functionalization of MWCNTs the tubular structure of CNTs are still tube-shape and they did not destroy in this process. Also, Figure S1b shows that the morphology of the surface after functionalization was changed. The TEM images of MWCNTs and SO<sub>3</sub>H@MWCNTs at scale bar 160 and 16 nm are shown in Figure S1c and S1d respectively. In these Figures the tubular structure of CNTs were seen and the results of SEM images were confirmed. Also, compared with the raw MWCNTs the prepared catalyst was covered by a foreign material.

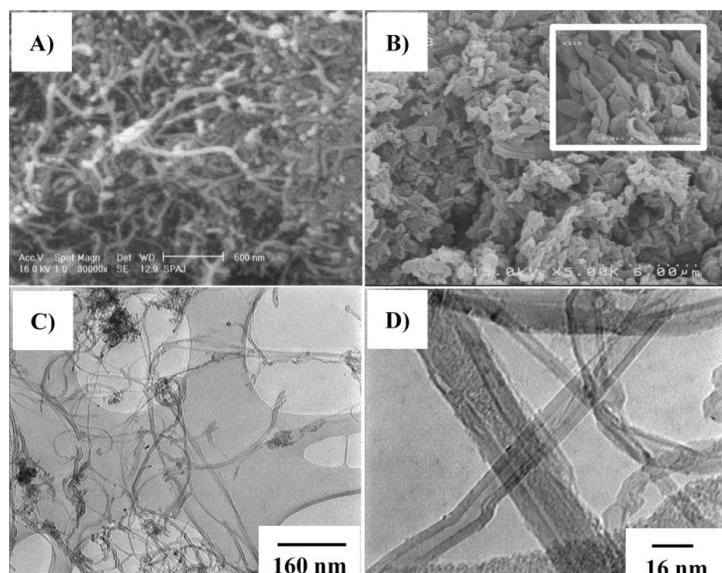

Figure S1, SEM images of (A): MWCNTs (B): SO<sub>3</sub>H@MWCNTs; TEM images of (C): MWCNTs (D): SO<sub>3</sub>H@MWCNTs

### ***FT-IR spectroscopy***

Figure S2 shows the FT-IR spectra of MWCNTs, COOH@MWCNTs, and SO<sub>3</sub>H@MWCNTs. Comparison between the FT-IR spectra of raw MWCNTs, COOH@MWCNTs, and SO<sub>3</sub>H@MWCNTs reveals some absorption bands in the COOH@MWCNTs, and SO<sub>3</sub>H@MWCNTs that are not present in the raw MWCNTs. In accordance with spectrum (A), the peak at  $\sim 3300\text{ cm}^{-1}$  is related to the presence of water in KBr pellet. In COOH@MWCNTs due to the changed the symmetry of CNTs, the absorbance bands are related to the C-O stretching, C=O stretching, O-H stretching, and C-O-C bending vibration. Also, distinguished peaks at 3346, 1624, 1512, and  $1150\text{ cm}^{-1}$  confirmed the presence of hydroxyl on carboxylic acid on the surface of MWCNTs. In addition, in spectrum (C) the peaks positioned at 1278, 1109, and  $553\text{ cm}^{-1}$  are associated to the stretching symmetry and asymmetry of the S=O bond and C-S respectively.

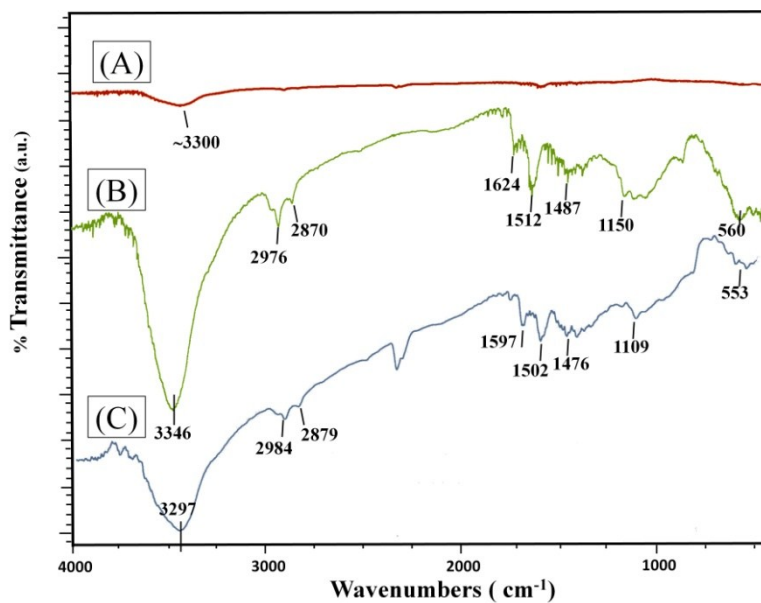

Figure S2, Comparison between the FT-IR spectra of (A): MWCNTs (B): COOH@MWCNTs (C): SO<sub>3</sub>H@MWCNTs

### *XRD results*

Figure S3 shows the XRD pattern of SO<sub>3</sub>H@MWCNTs after functionalization. This pattern displays that the crystal structure of CNTs are still tubular relative to the XRD pattern of raw CNTs. Two peaks are indexed as the (001) and (112) planes of the CNTs at 2θ: 27.3 and 41° respectively.

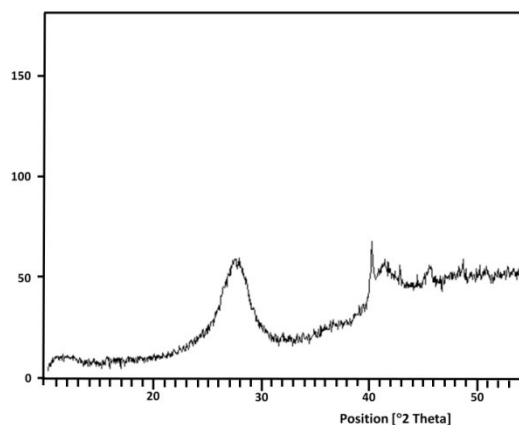

Figure S3, XRD pattern of SO<sub>3</sub>H@MWCNTs

### ***Raman spectroscopy***

Figure S4, shows the Raman spectra of MWCNTs, COOH@MWCNTs and SO<sub>3</sub>H@MWCNTs. As shown in this Figure, the spectrum exhibit three peaks at about 1320, 1571 and 2660 cm<sup>-1</sup>. The peak at 1571 cm<sup>-1</sup> is determined with the tangential mode (G-band). The origin of the line at 1320 cm<sup>-1</sup> is the D-band and its appearance has been tentatively assigned to a symmetry lowering effect, such as the presence of nanoparticles (synthesis of CNTs) and functional groups such as sulfonic acid on the side walls of MWCNTs. The line at 2660 cm<sup>-1</sup> has been attributed to the overtone of the D-band (G'-band). We can calculate that I<sub>D</sub>/I<sub>G</sub> values of MWCNTs, COOH@MWCNTs and SO<sub>3</sub>H@MWCNTs are 0.24, 0.37 and 0.84, respectively. This increasing value implies that a strong damage to the side walls of CNTs is due to the functionalization. The existence of RBM in low frequency of SO<sub>3</sub>H@MWCNTs indicated that MWCNTs are still in their tubular structure after treatment of sulfuric acid and functionalization, although some MWCNTs were probably damaged by strong oxidation.

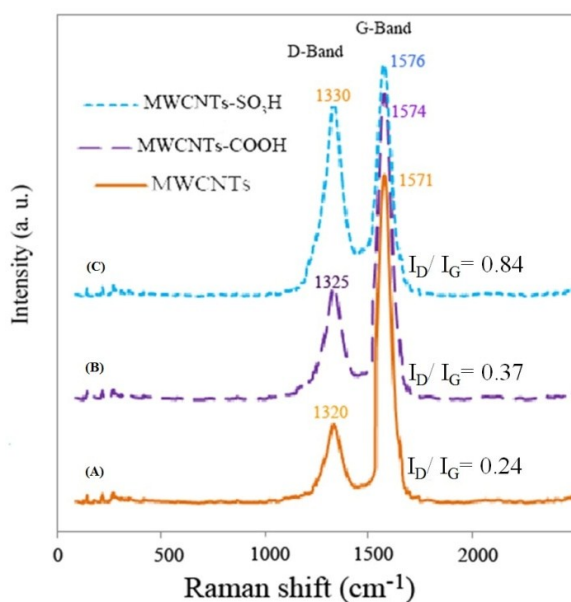

Figure S4, Raman spectra of (A): MWCNTs (B): COOH@MWCNTs (C): SO<sub>3</sub>H@MWCNTs

### **TGA results**

TGA thermograms were used to determine the amount of formed sulfonic and carboxylic acid groups on the side wall of the MWCNTs. Figure S5 shows thermograms of COOH@MWCNTs, and SO<sub>3</sub>H@MWCNTs. The weight loss between 100 °C and 200 °C is entirely due to the presence of amorphous carbon, water, metals and so on. Also, the weight loss between 200 °C and 600 °C is completely due to functional groups on the end and side wall of the MWCNTs. It is possible that these functional groups in this research are OH, COOH, and SO<sub>3</sub>H groups. As shown in Figure S5a, the attached COOH group decomposed at about ~250 °C and 18% weight was decreased. After treatment of the H<sub>2</sub>SO<sub>4</sub> with COOH@MWCNTs, TGA of the SO<sub>3</sub>H@MWCNTs showed the 49% weight was deleted. Accordingly these results indicate that 67% weight can be ascribed to the covalently of sulfonic and carboxylic acid groups to the side wall of the MWCNTs. Taking into account that the covalently SO<sub>3</sub>H measurements indicated one functionality every ~five C atoms in the MWCNTs-SO<sub>3</sub>H. Results obtained by TGA thermograms showed good agreement with results of FT-IR spectroscopy and Raman spectroscopy.

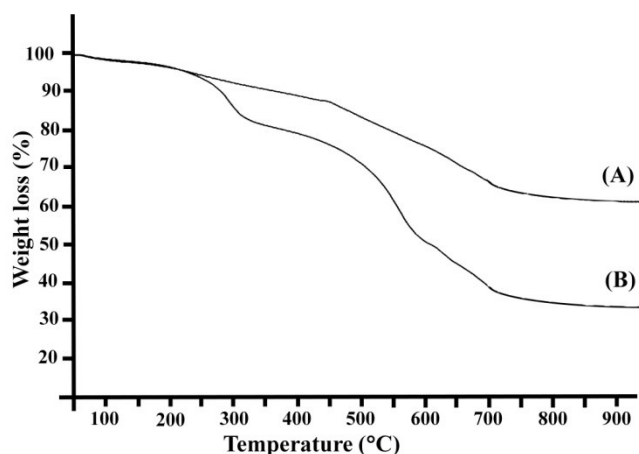

Figure S5, TGA curve of (A): COOH@MWCNTs (B): SO<sub>3</sub>H@MWCNTs

For calculation the extent of functionalization per C atoms, weight loss values were employed together with the molecular weight of the different groups and the following Equation was applied. Where X stands for the number of carbon atoms in the CNTs sample per each covalent functional group, R (%) is the residual mass at 600 °C in the TGA plot, L (%) is the weight loss in the range of 200°C and 600 °C, and Mw is the molecular weight of the desorbed functional groups.

$$\text{Equation(1): } X = \frac{R (\%) \times Mw \left(\frac{\text{g}}{\text{mol}}\right)}{L (\%) \times 12 \left(\frac{\text{g}}{\text{mol}}\right)}$$

### ***Acidity measurement of the catalysts***

Acid-base titration was employed to determine the density of sulfonic acid groups on the side wall of the SO<sub>3</sub>H@MWCNTs. The volume required to reach the neutral point was subtracted from the initial volume of NaOH used to obtain the volume of NaOH which has reacted with SO<sub>3</sub>H group on the side wall MWCNTs (Equation 3). The measurement was repeated three times for each sample and the average calculated. The acid-base titration showed that the amount of SO<sub>3</sub>H attached to MWCNTs is 1.80 mmol.g<sup>-1</sup>. In addition, after preparation of COOH@MWCNTs, we calculate amount of –OH and –COOH by acid-base titration as described above. Acid-base titration for MWCNTs-COOH was 0.15 mmol.g<sup>-1</sup>.

(Equation 2)

NaOH (mmol reacted with SO<sub>3</sub>H) = NaOH (primary mmol) - NaOH (mmol unreacted with SO<sub>3</sub>H)



**Copy of  $^1\text{H}$  NMR and  $^{13}\text{C}$  NMR of synthetic compounds**

# 2,6-Bis-(2-hydroxybenzyl)-phenol (Compound C1)

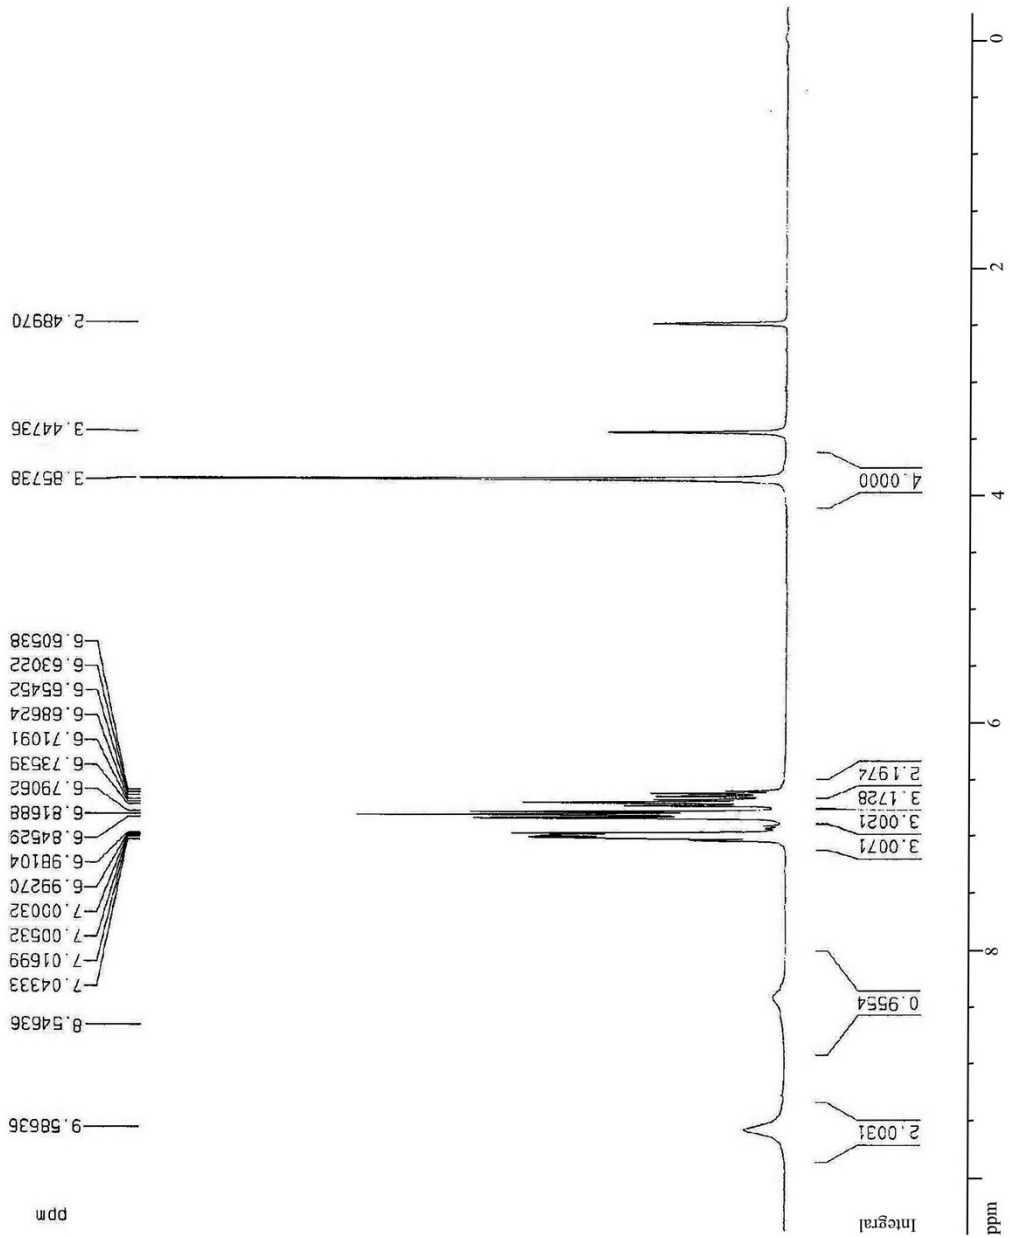

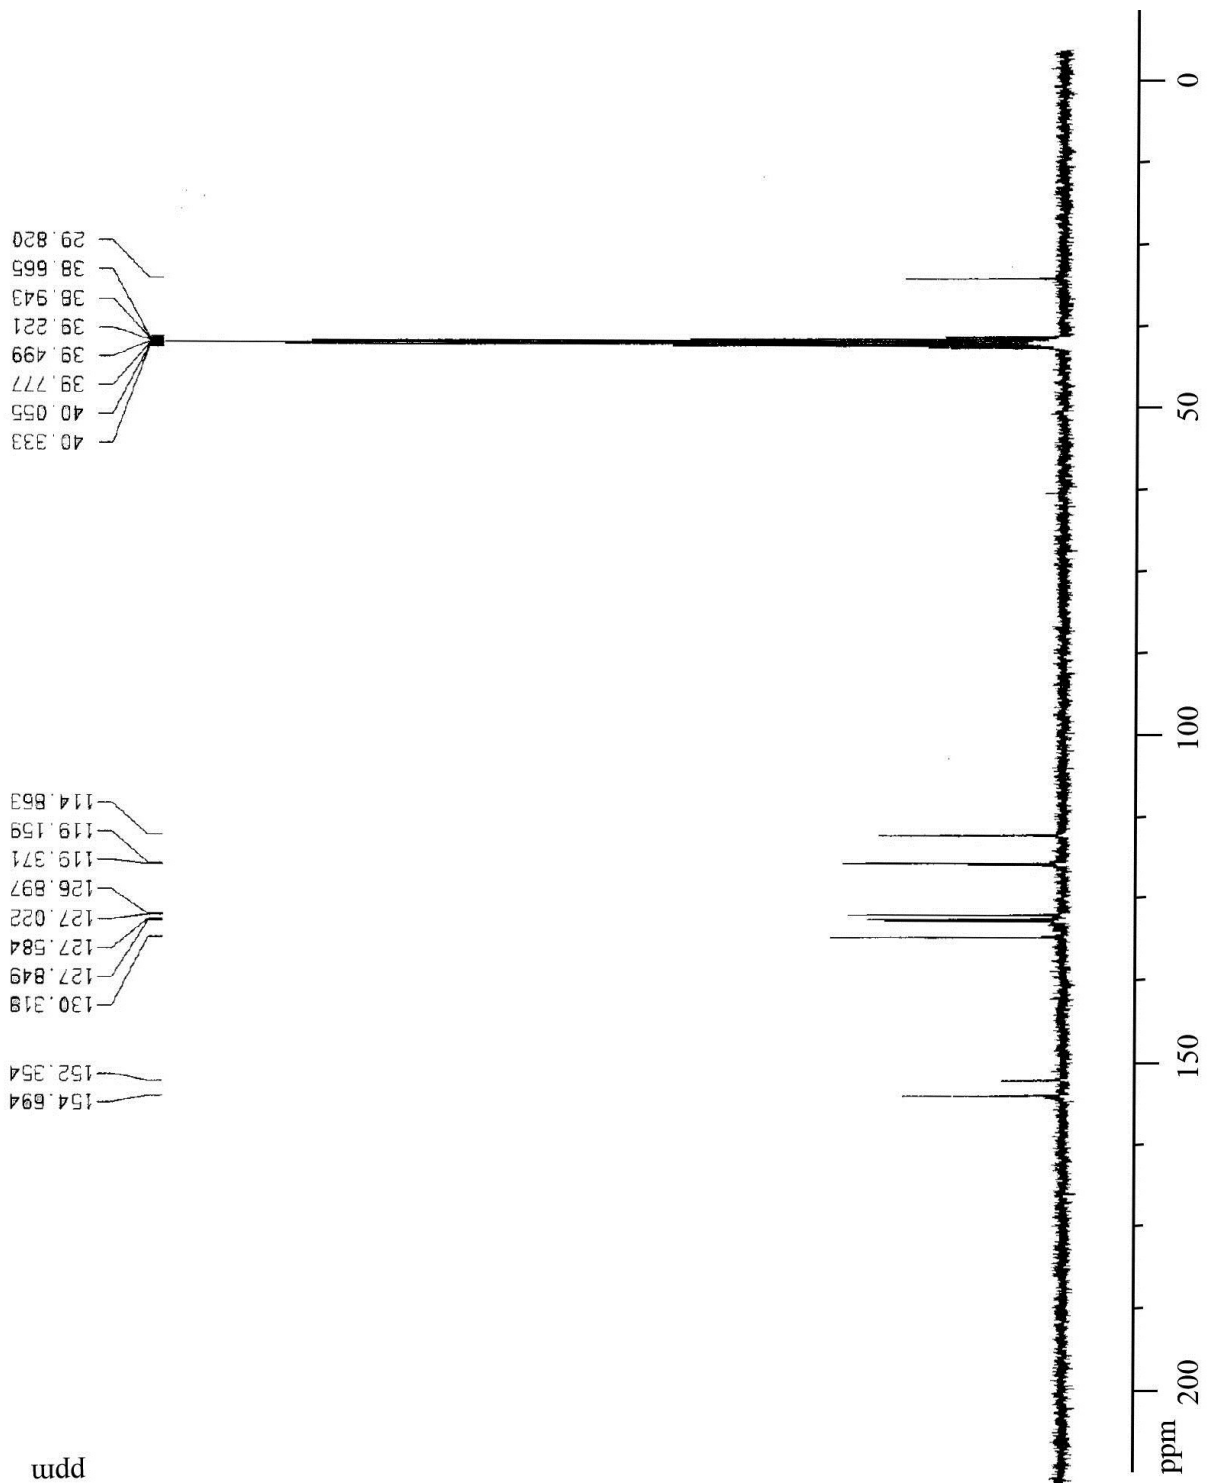

2,6-Bis-(2-hydroxy-5-methylbenzyl)-4-methylphenol (Compound C2)

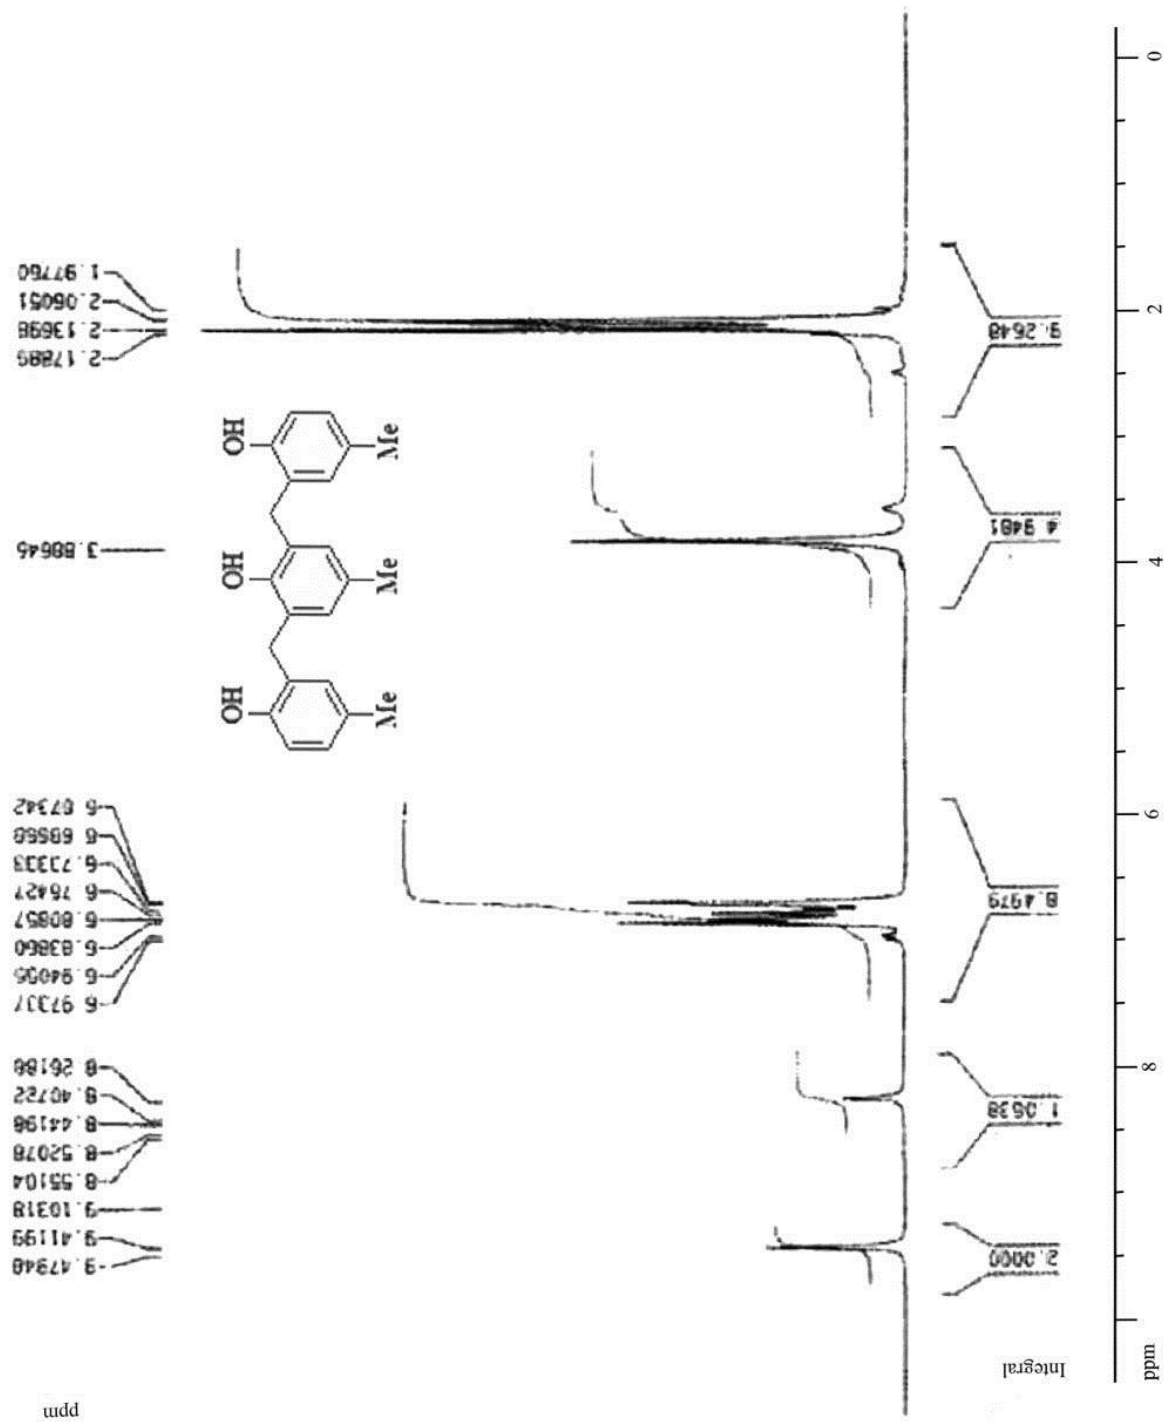

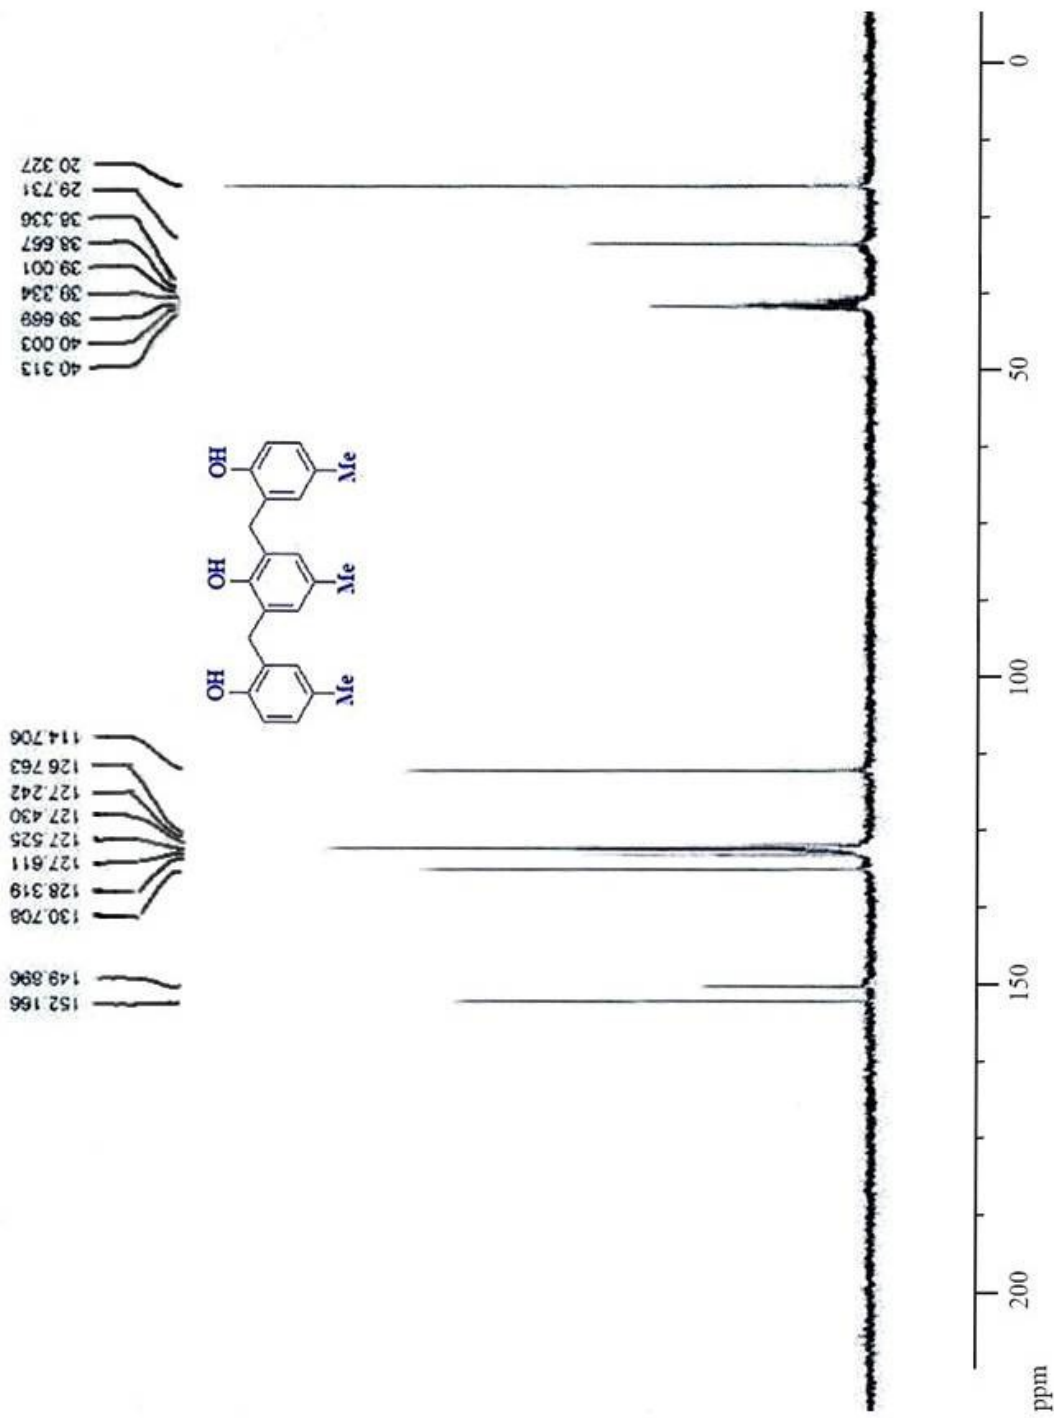

2,6-Bis-(2-hydroxy-5-methyl-3-*tert*-butylbenzyl)-4-methylphenol (Compound C3)

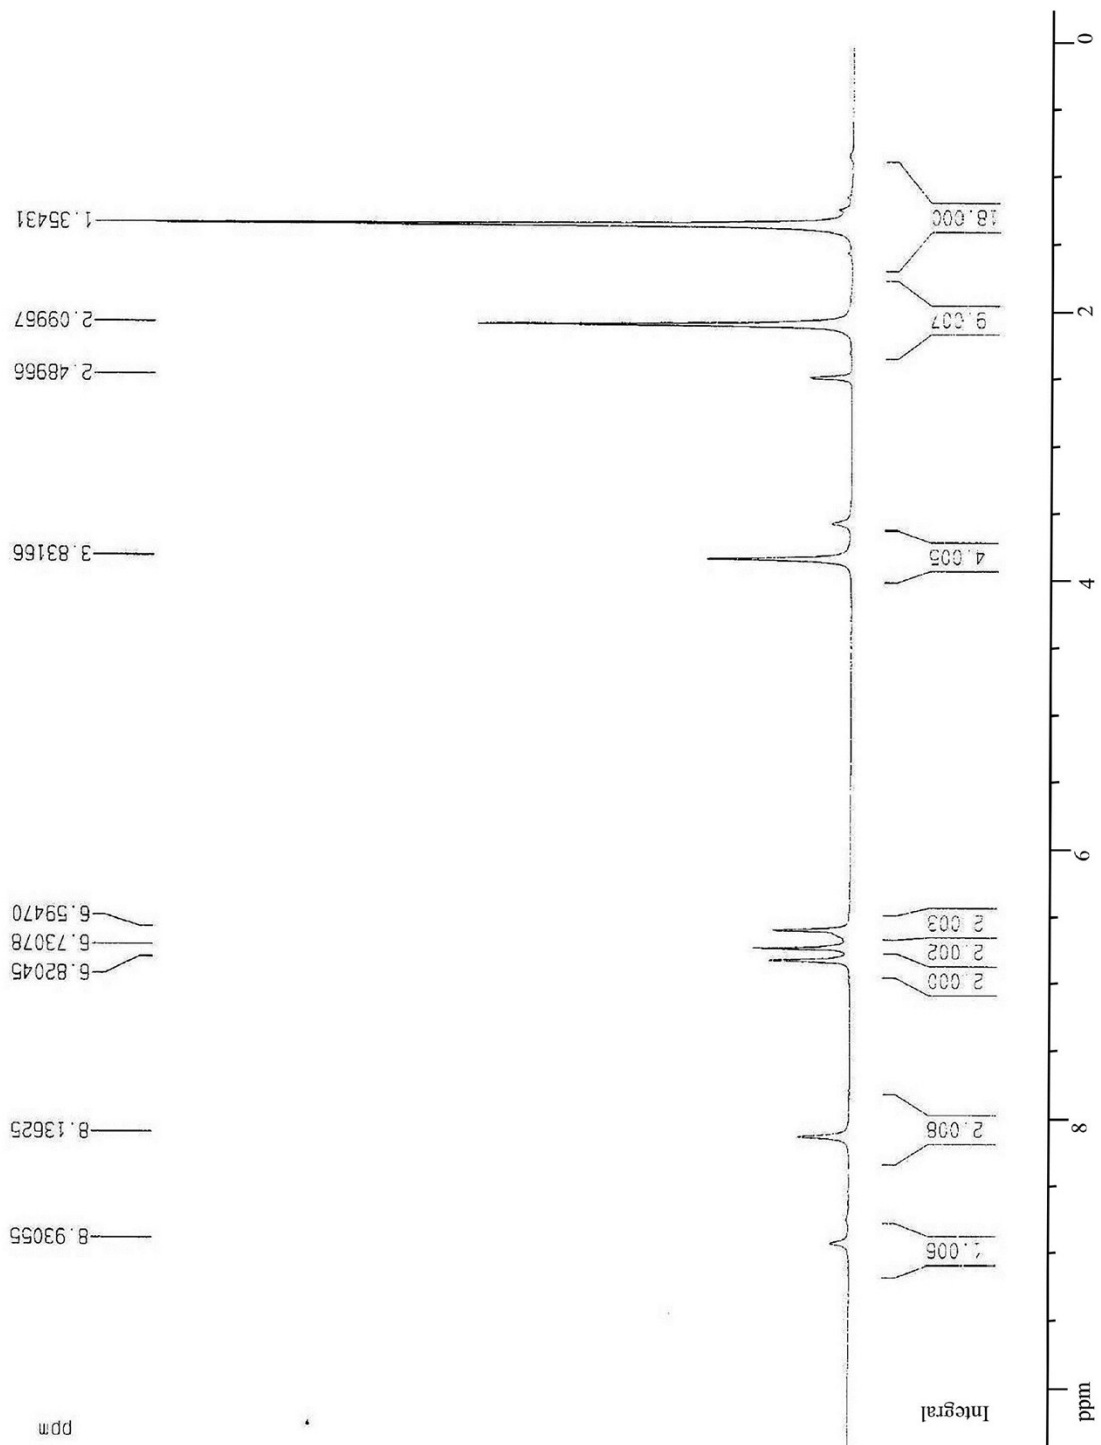

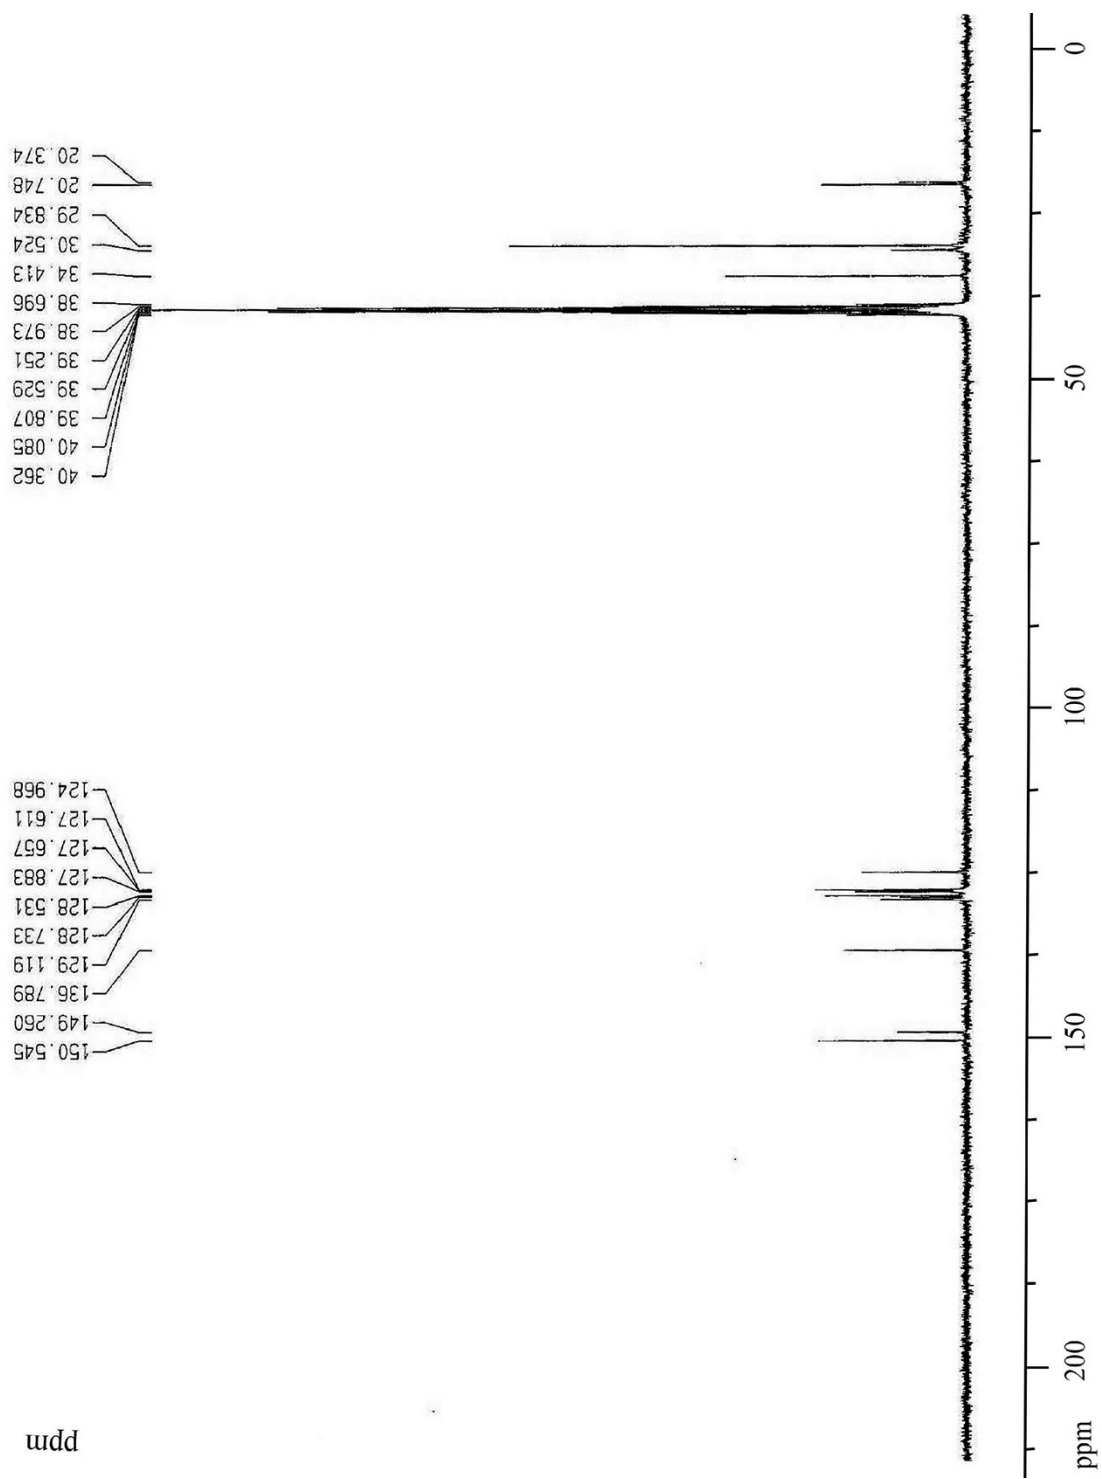

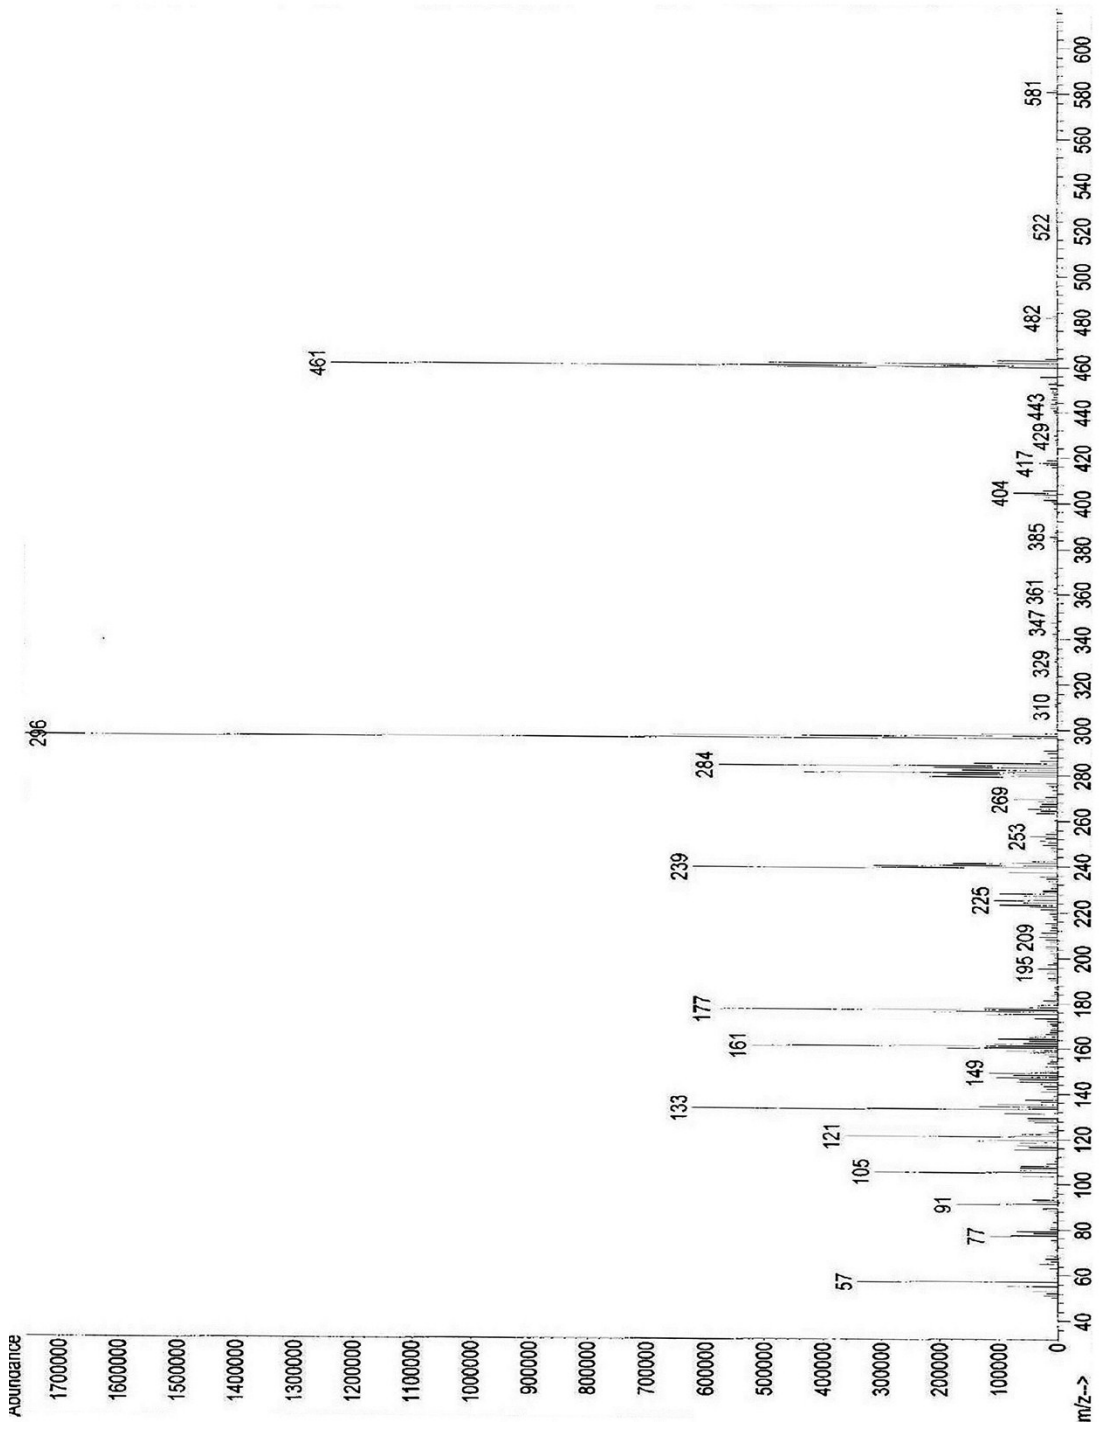



# 2,6-Bis-(5-Bromo-2-hydroxybenzyl)-4-methylphenol (Compound C4)

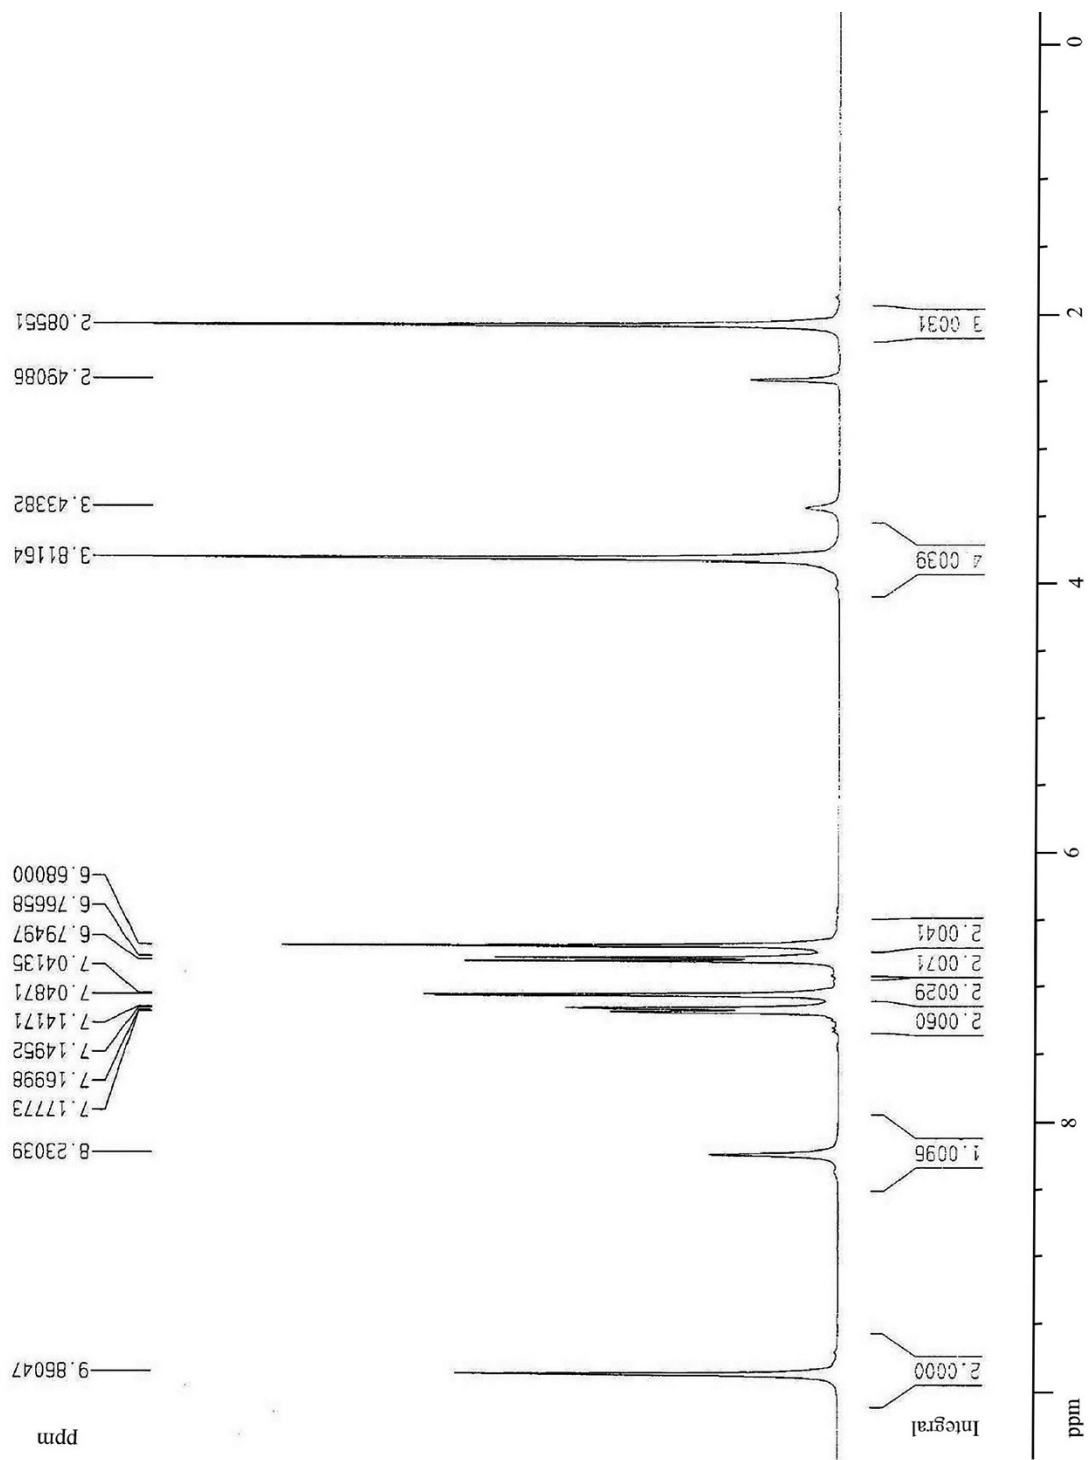

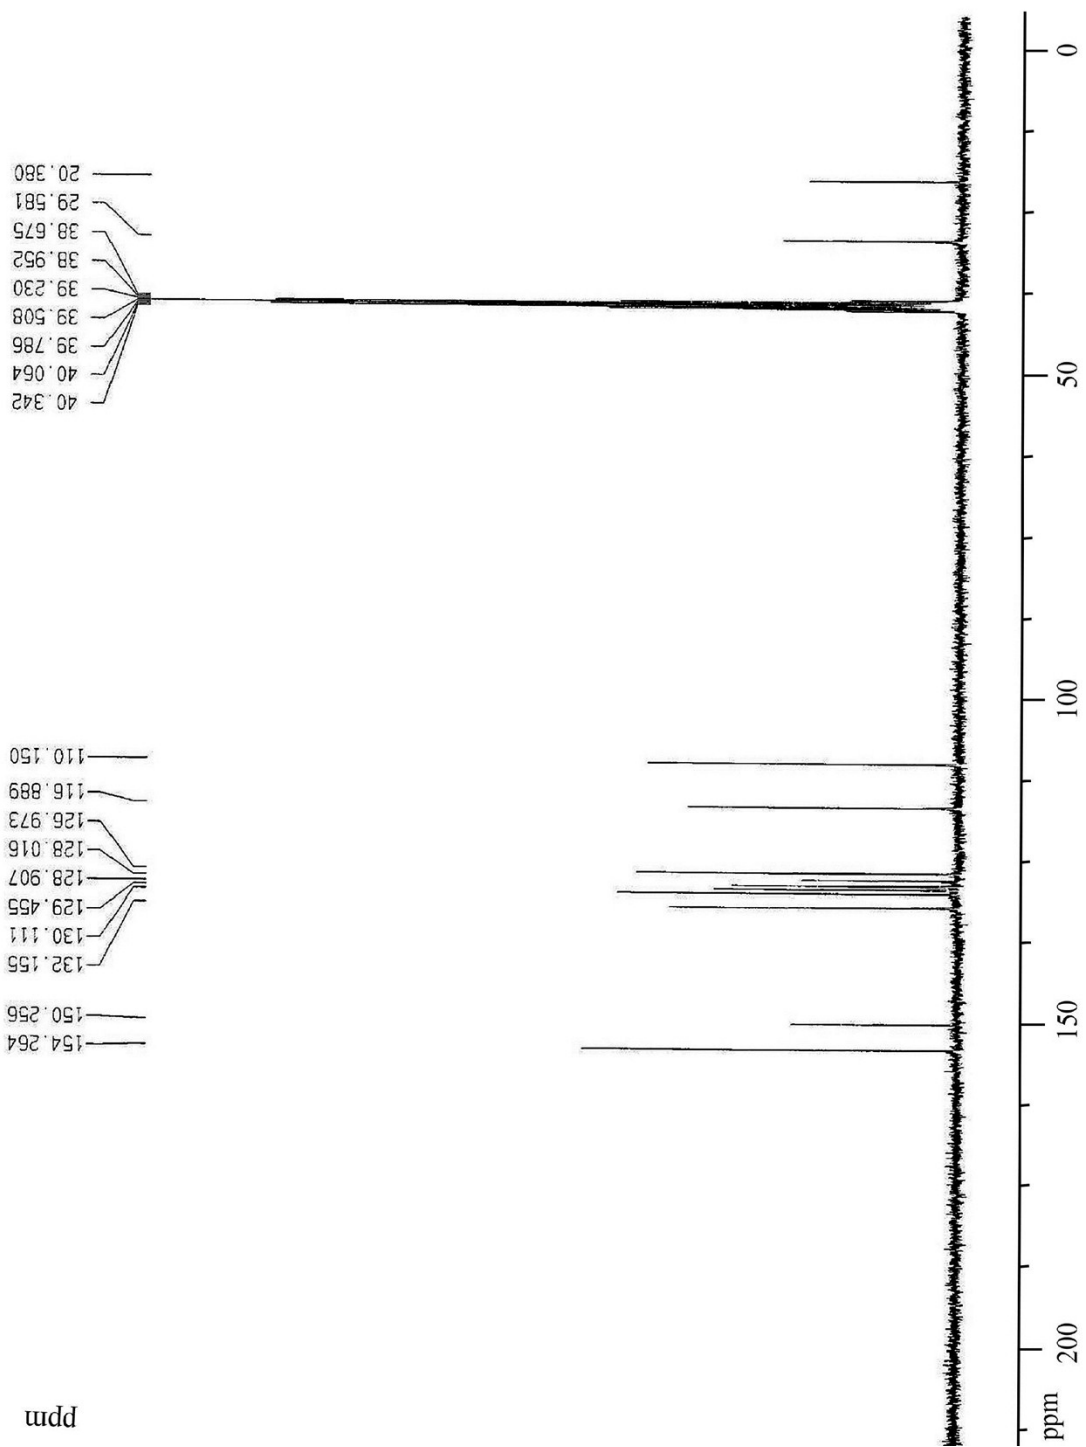

ppm

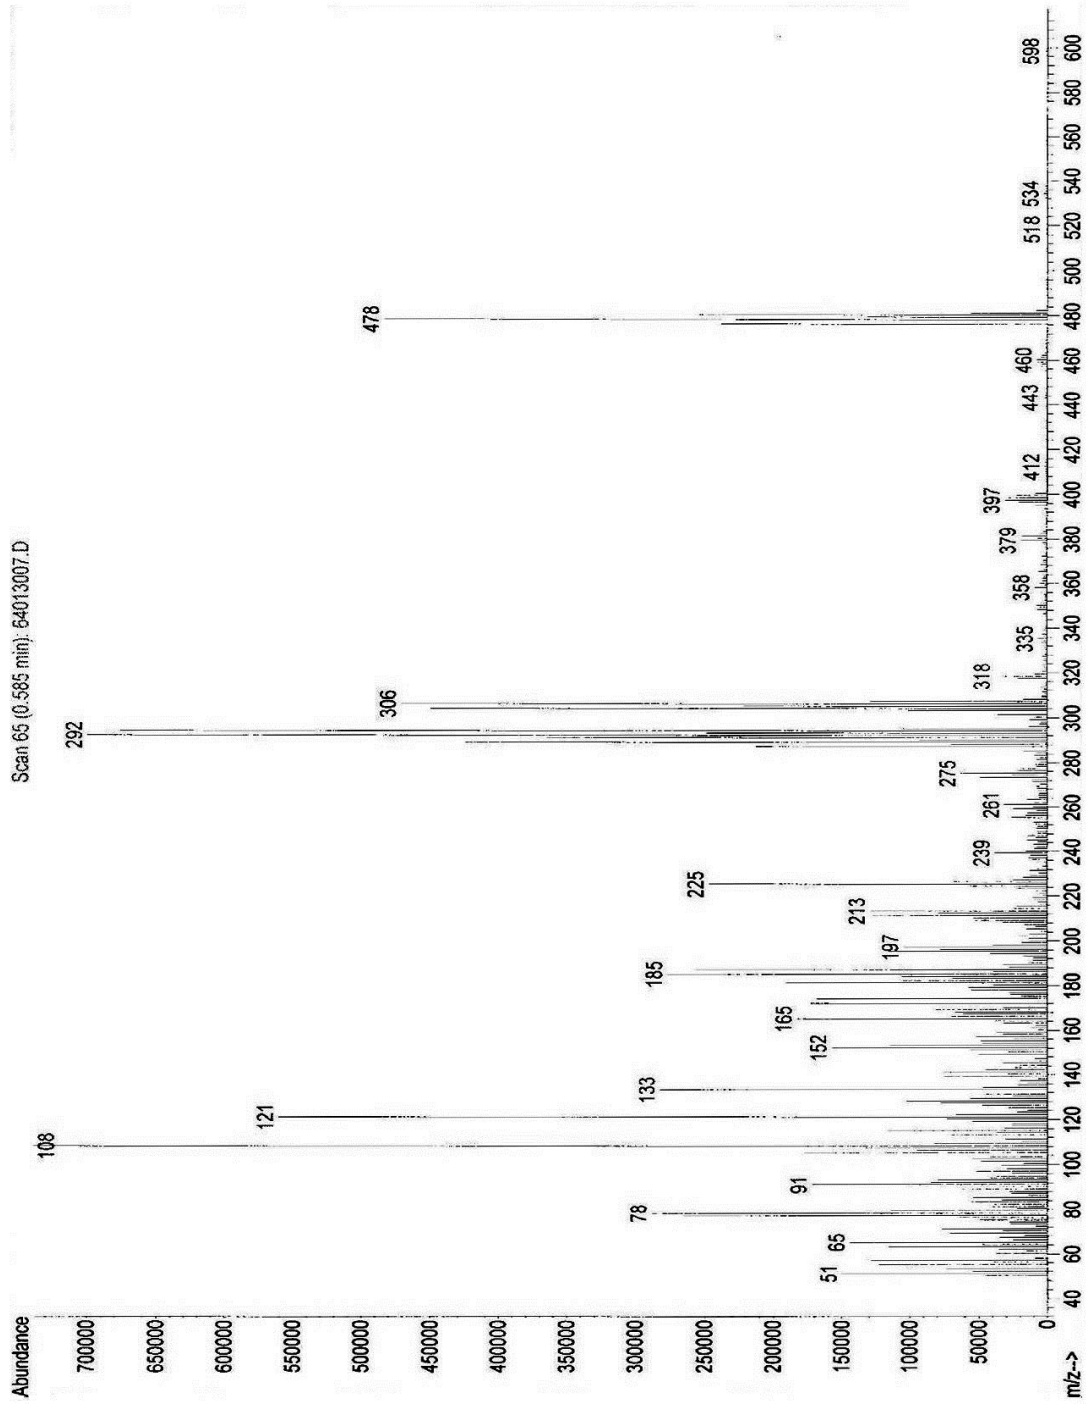

2,6-bis-(5-chloro-2-hydroxybenzyl)-4-bromophenol (Compound C5)

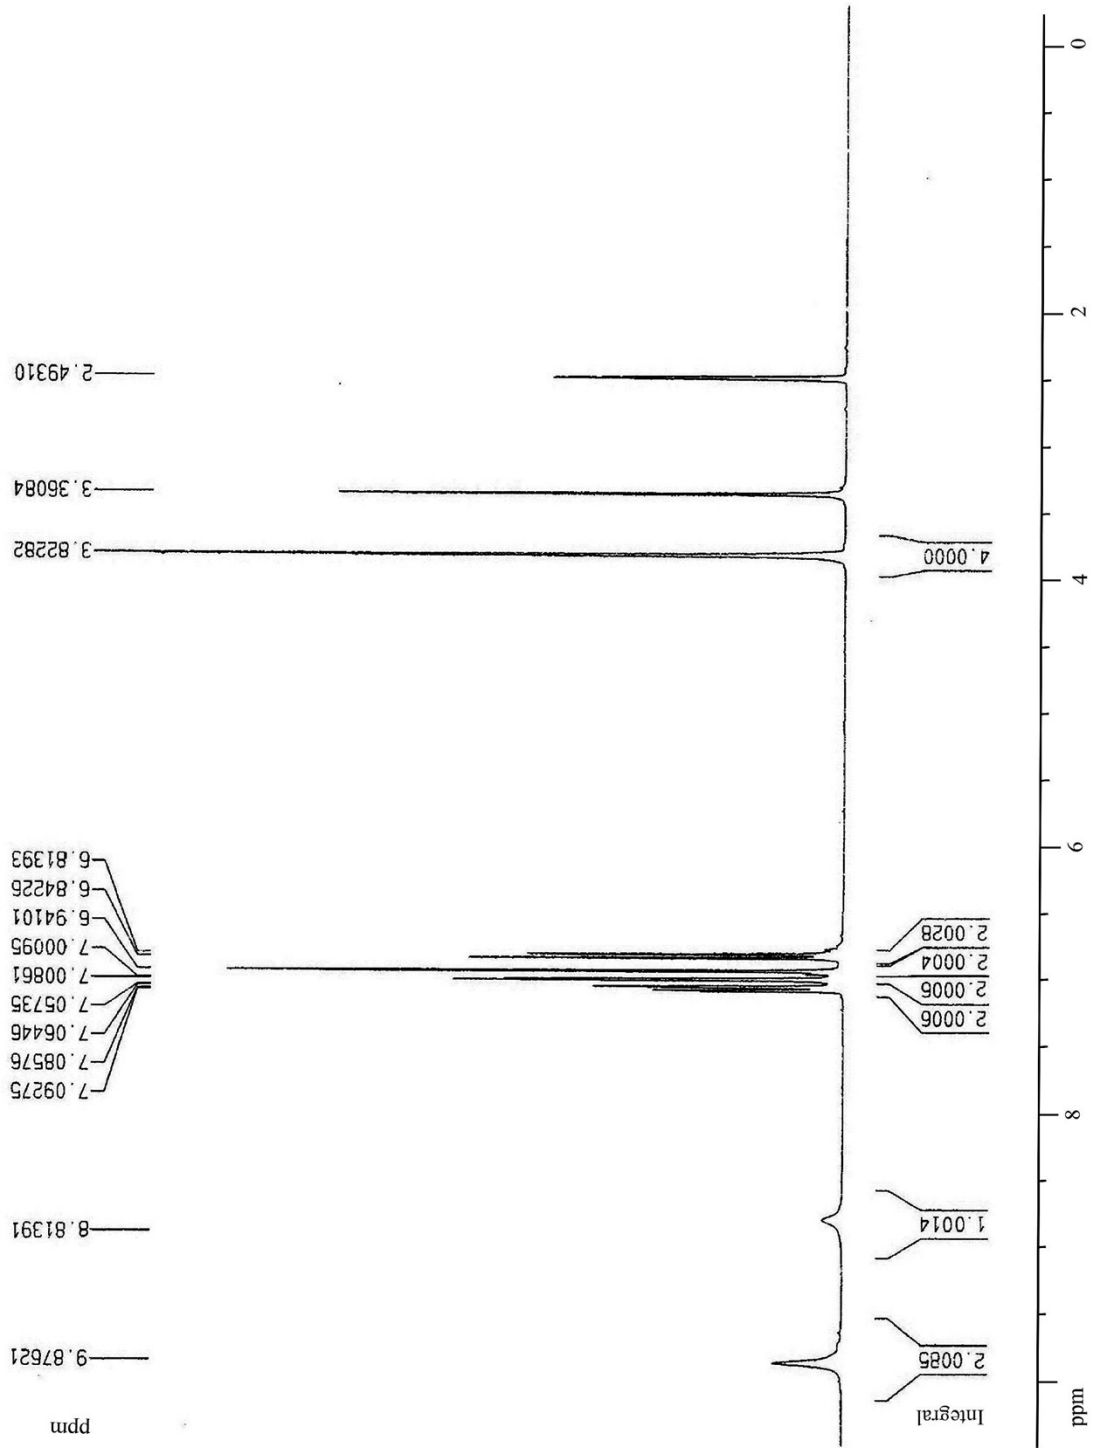

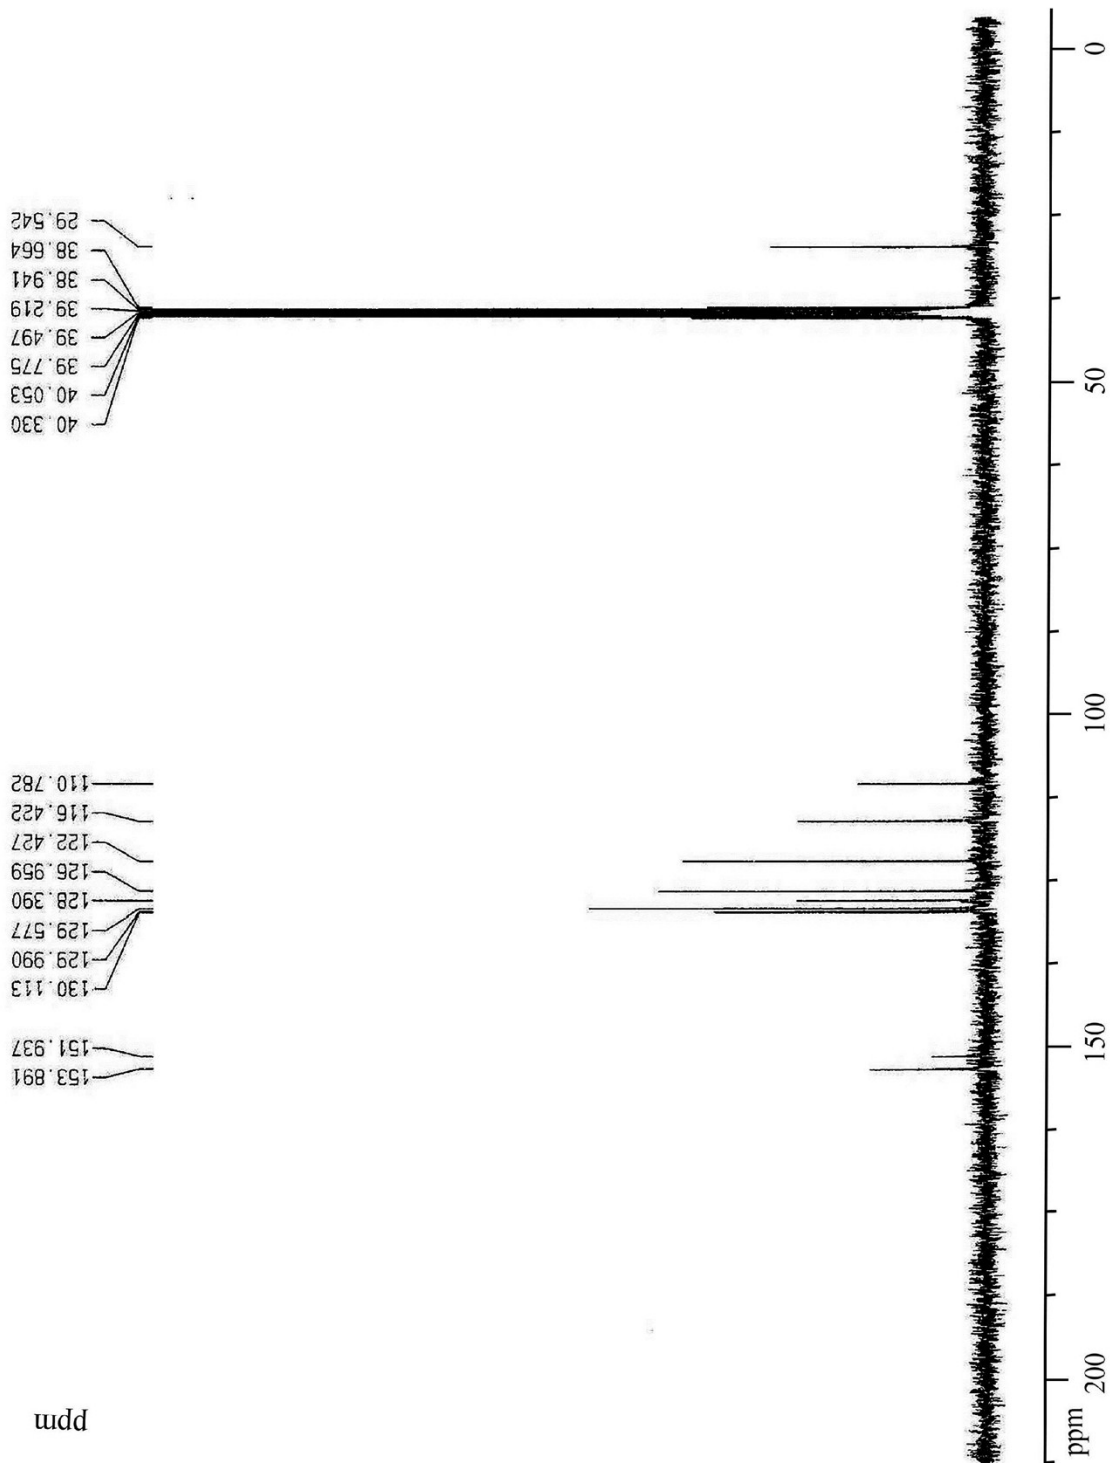

ppm

2,6-Bis-(5-chloro-2-hydroxybenzyl)-4-fluorophenol (Compound C6)

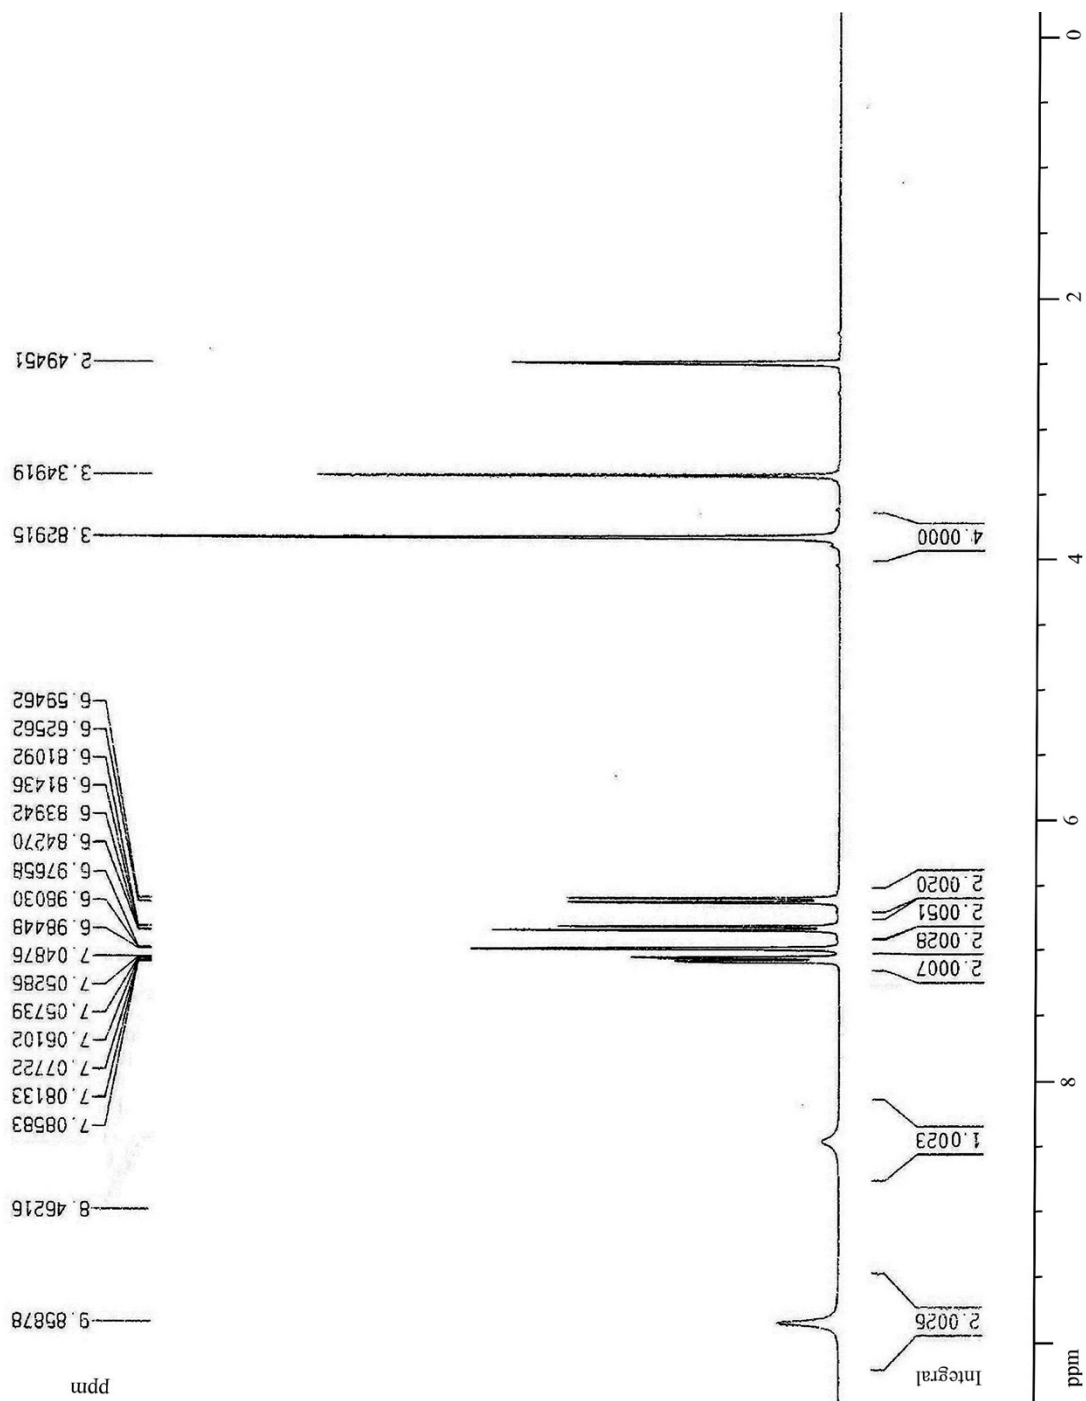

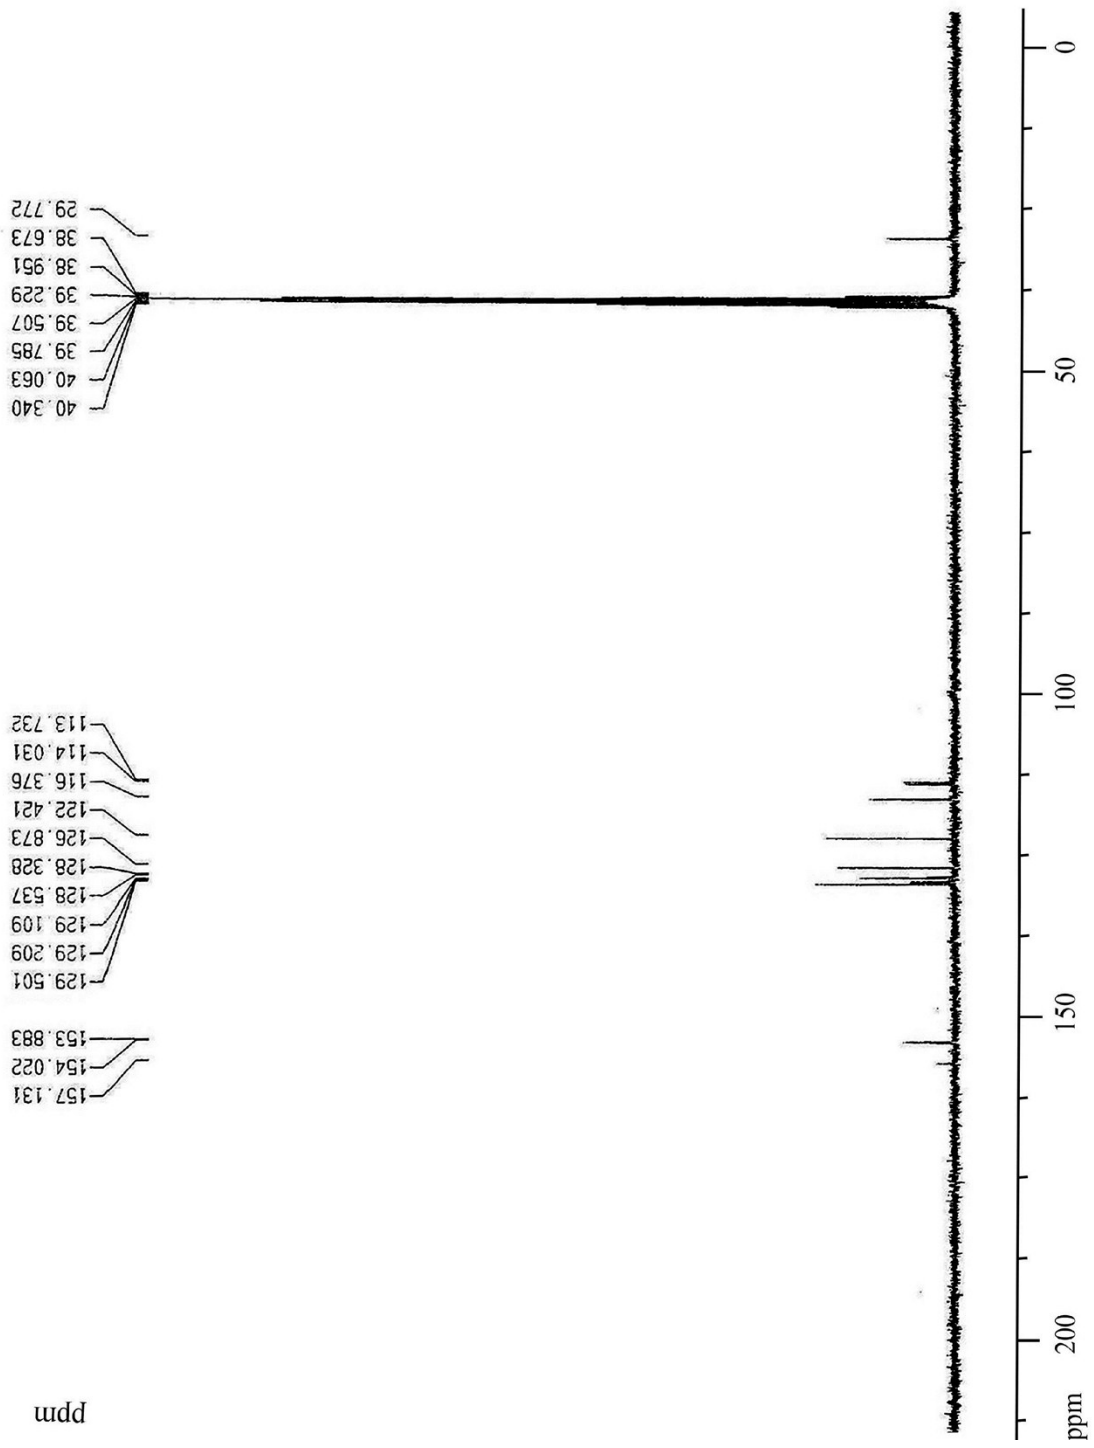

ppm

2,6-Bis-(5-chloro-2-hydroxybenzyl)-4-chlorophenol (Compound C7)

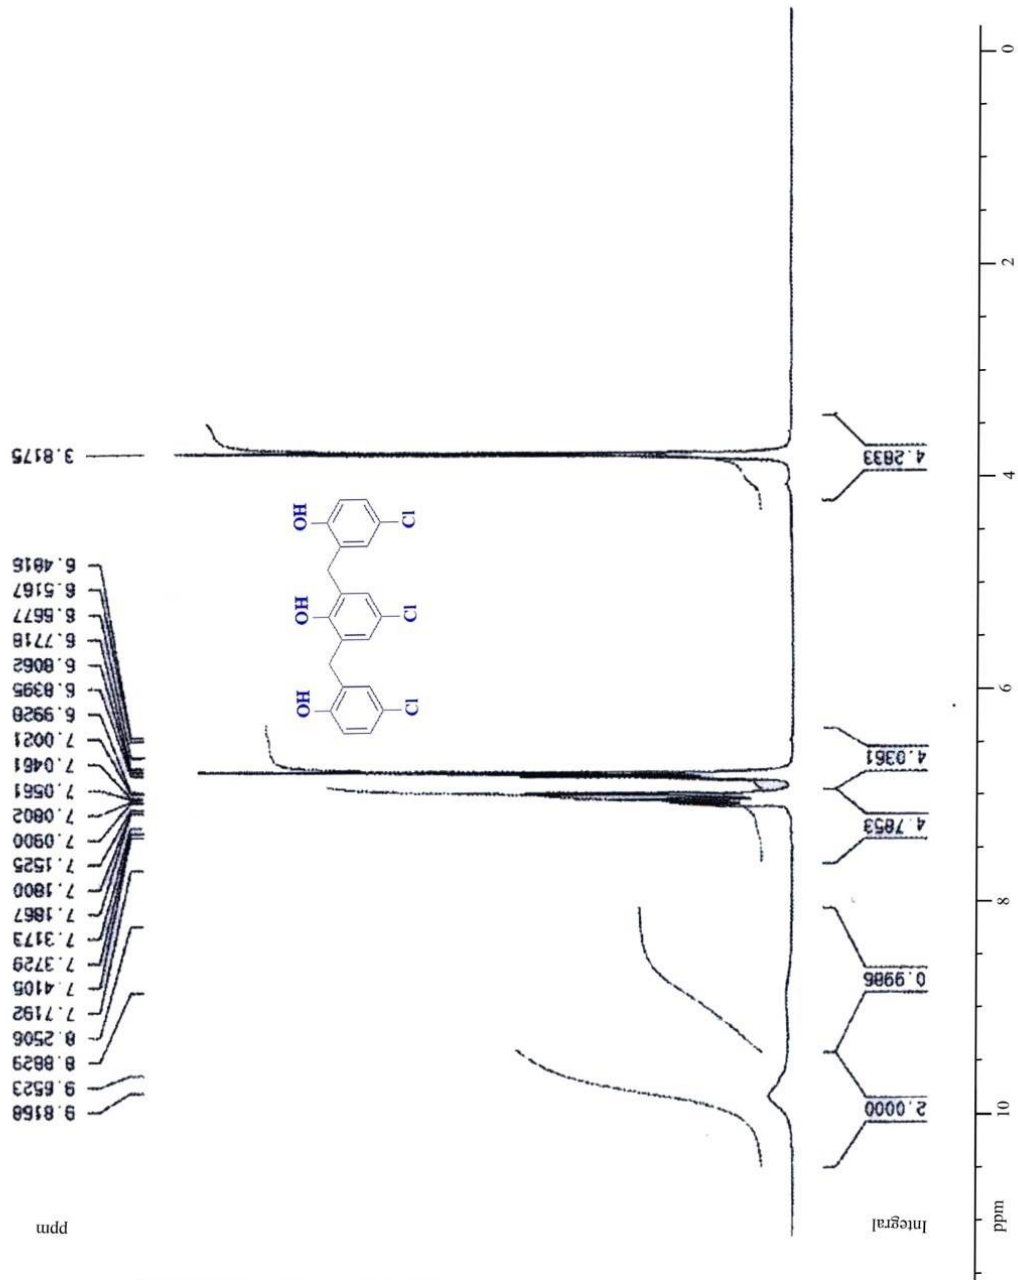



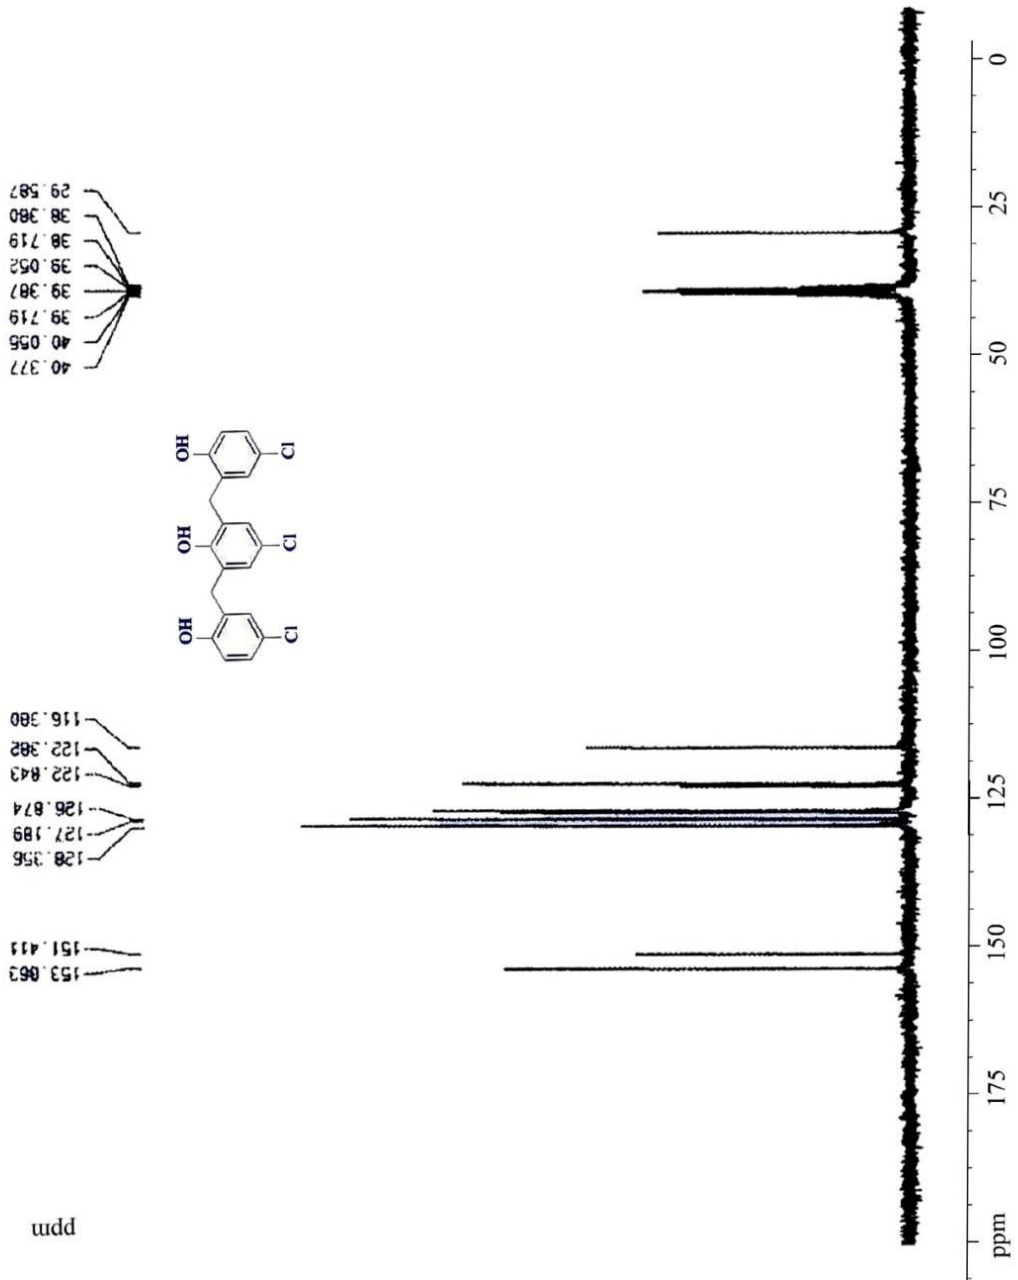

2,6-Bis-(2-hydroxy-5-methylbenzyl)-4-chlorophenol (Compound C8)

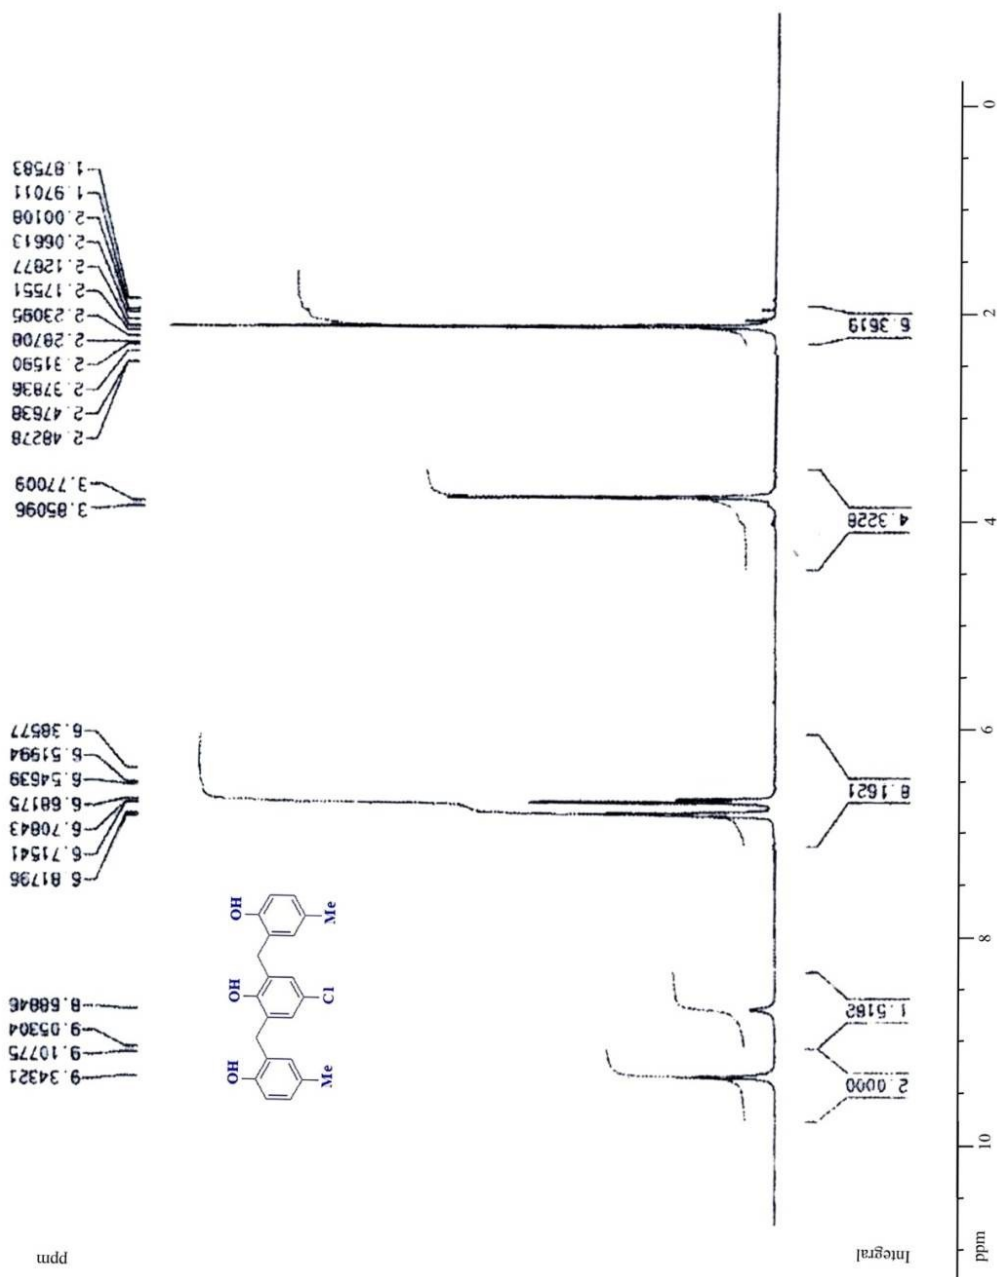

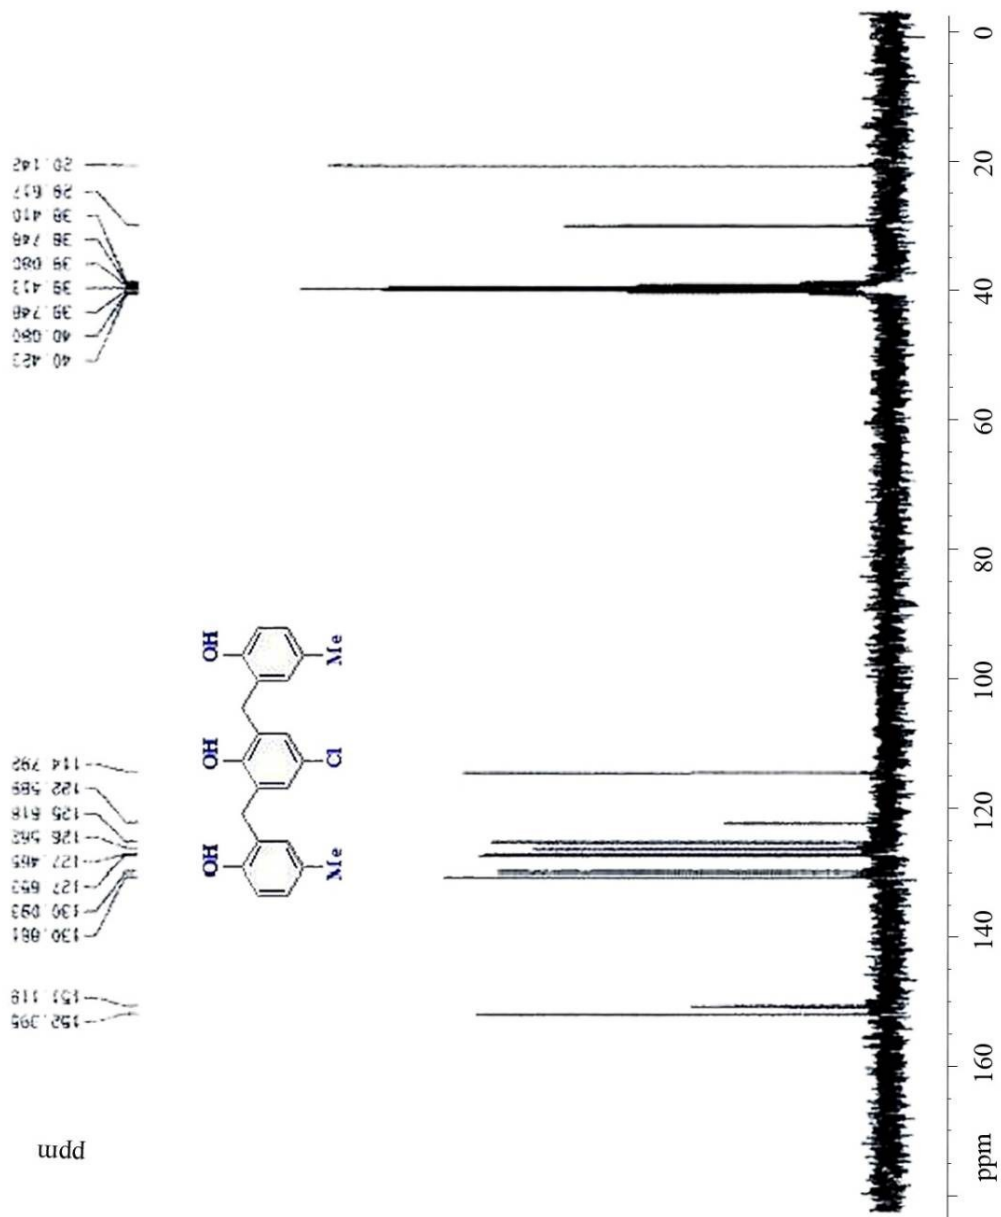

2,6-Bis-(5-fluoro-2-hydroxybenzyl)-4-chlorophenol (Compound C9)

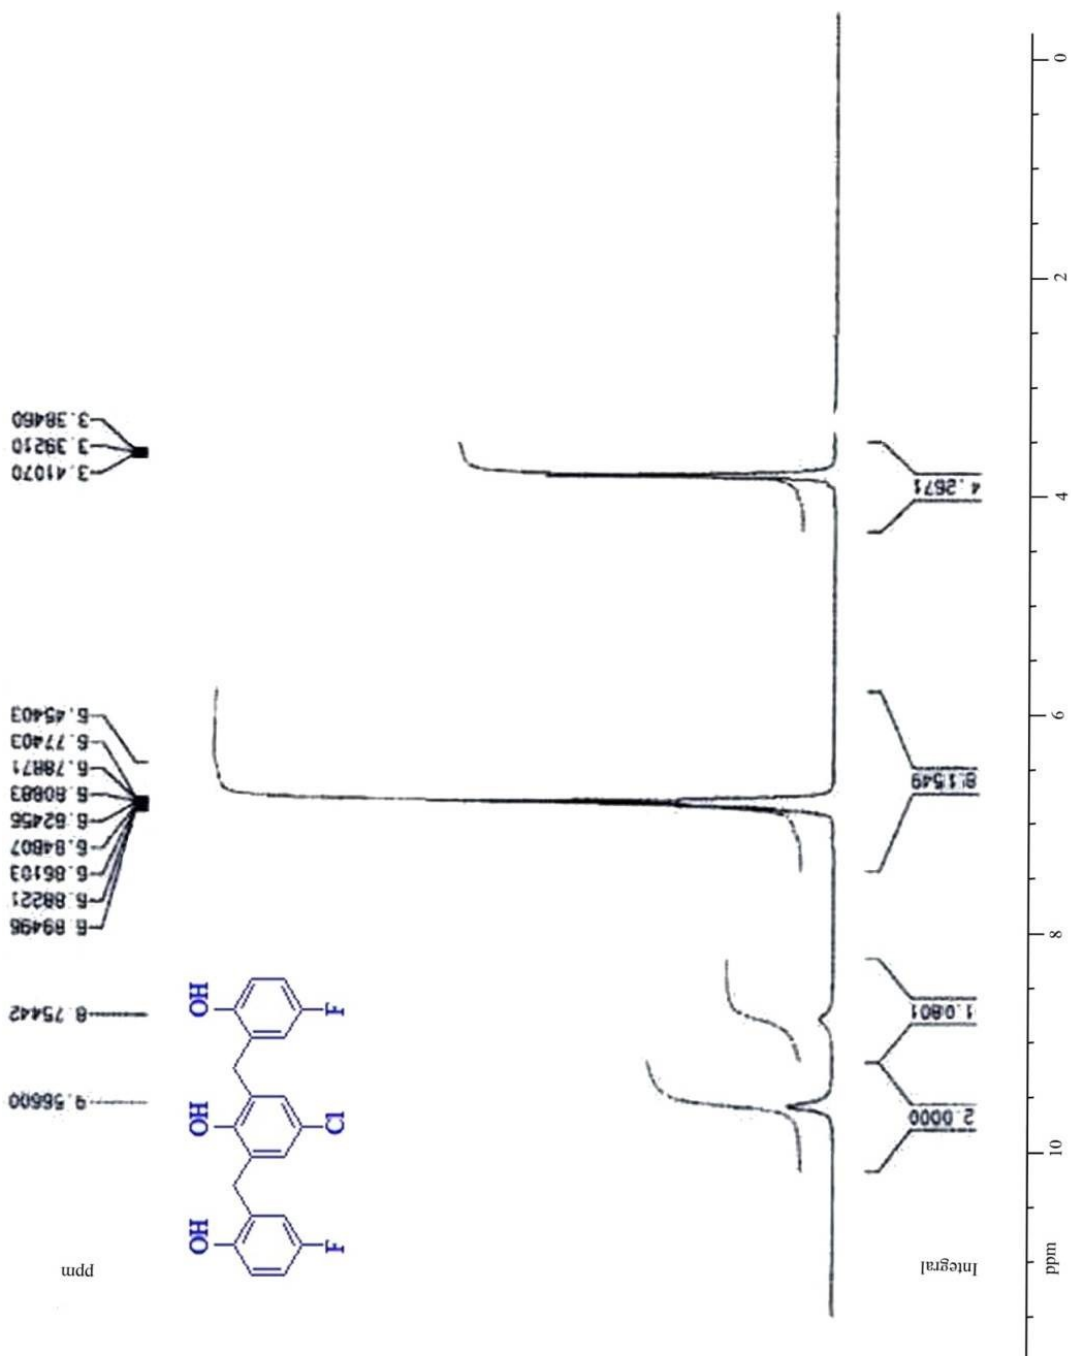

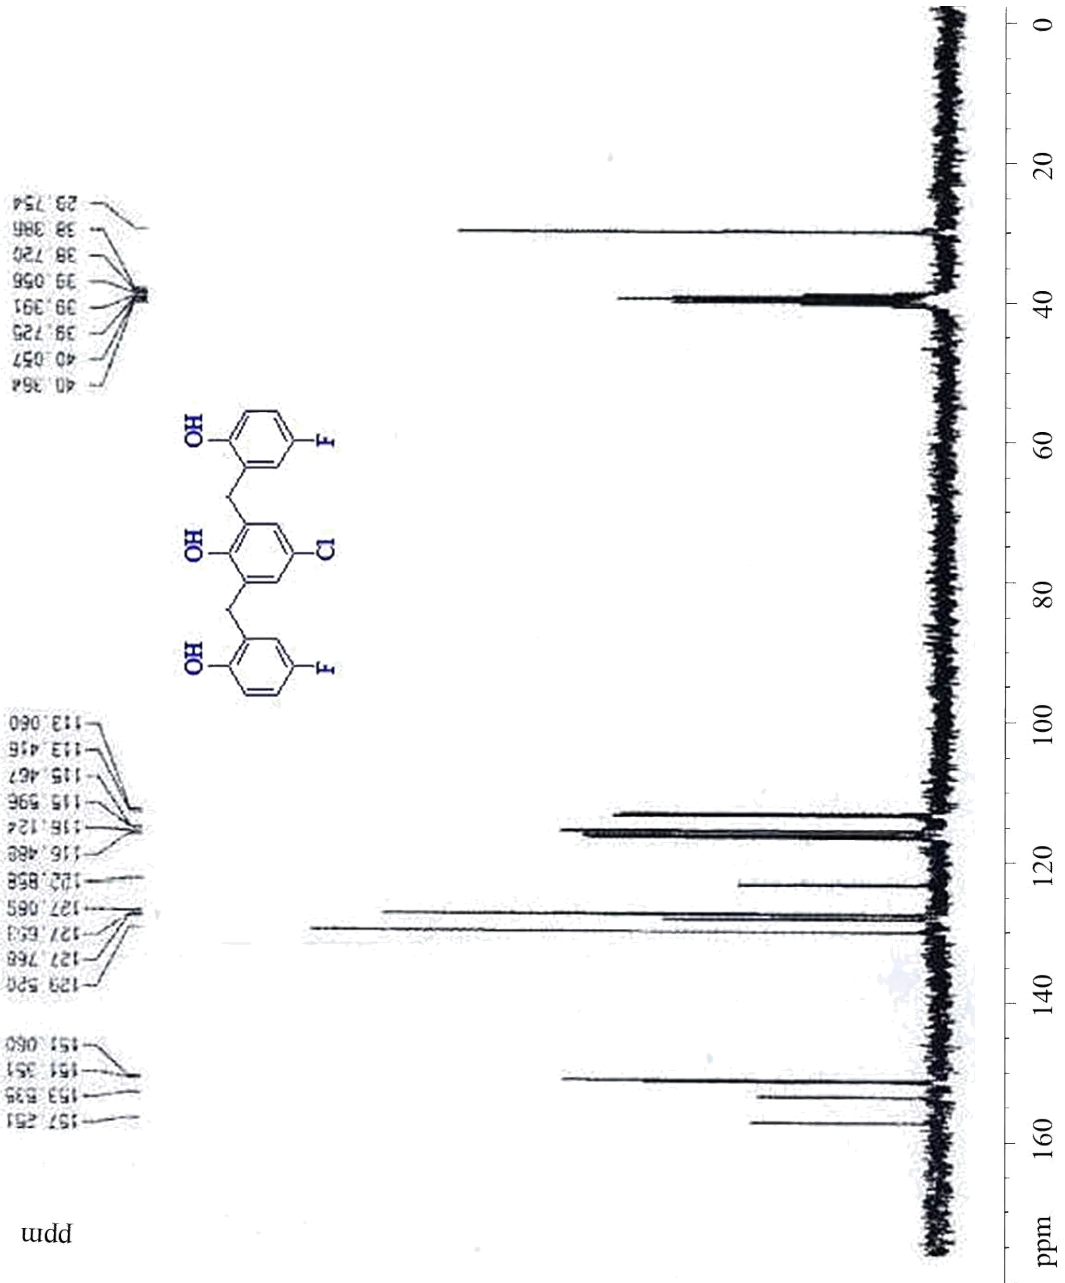

udd

# 2,6-Bis-(5-bromo-2-hydroxybenzyl)-4-bromophenol (Compound C10)

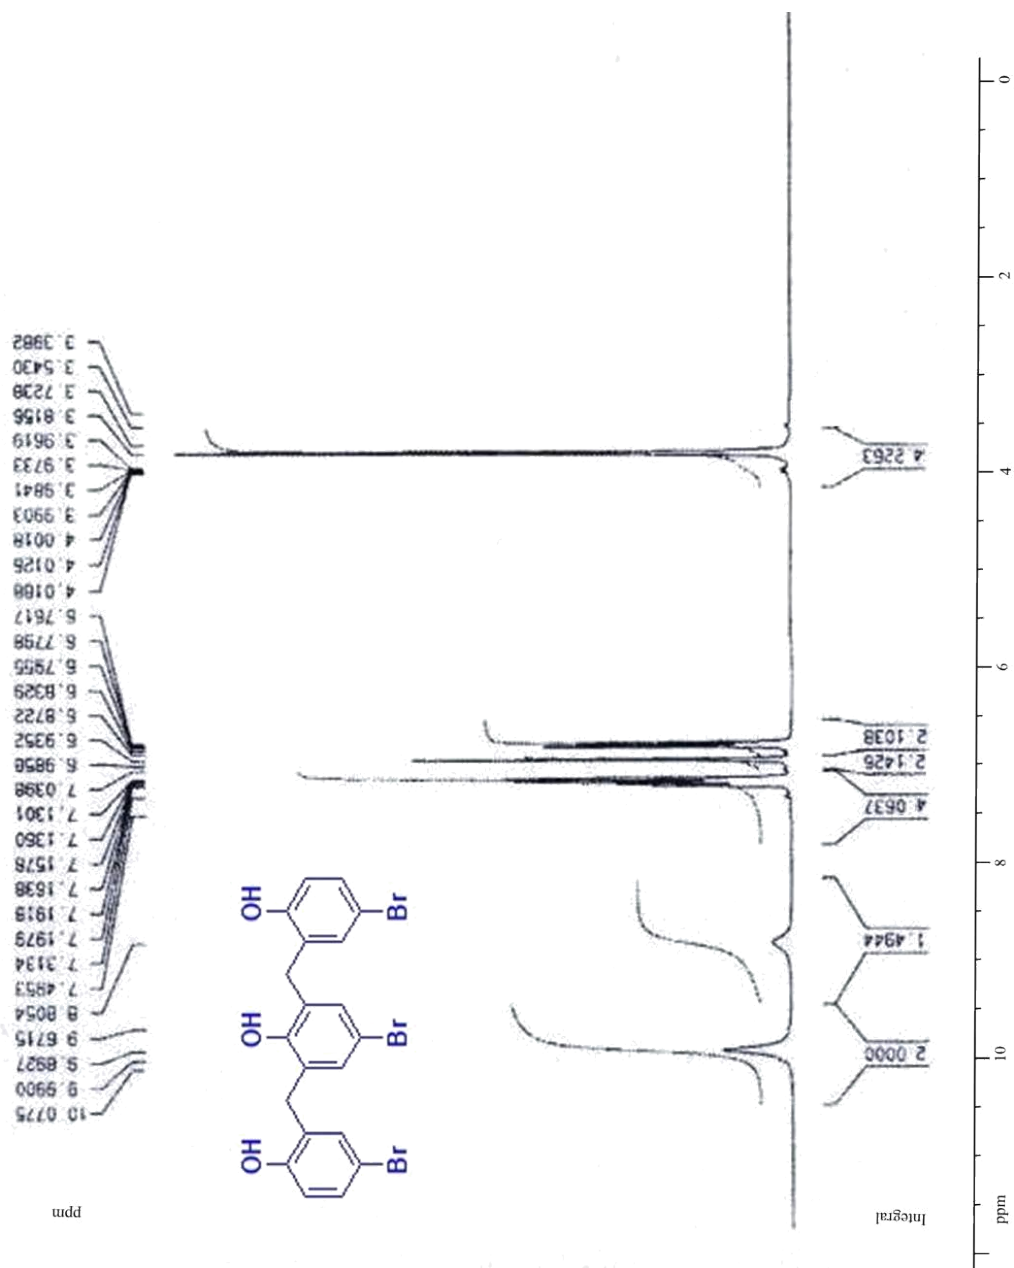

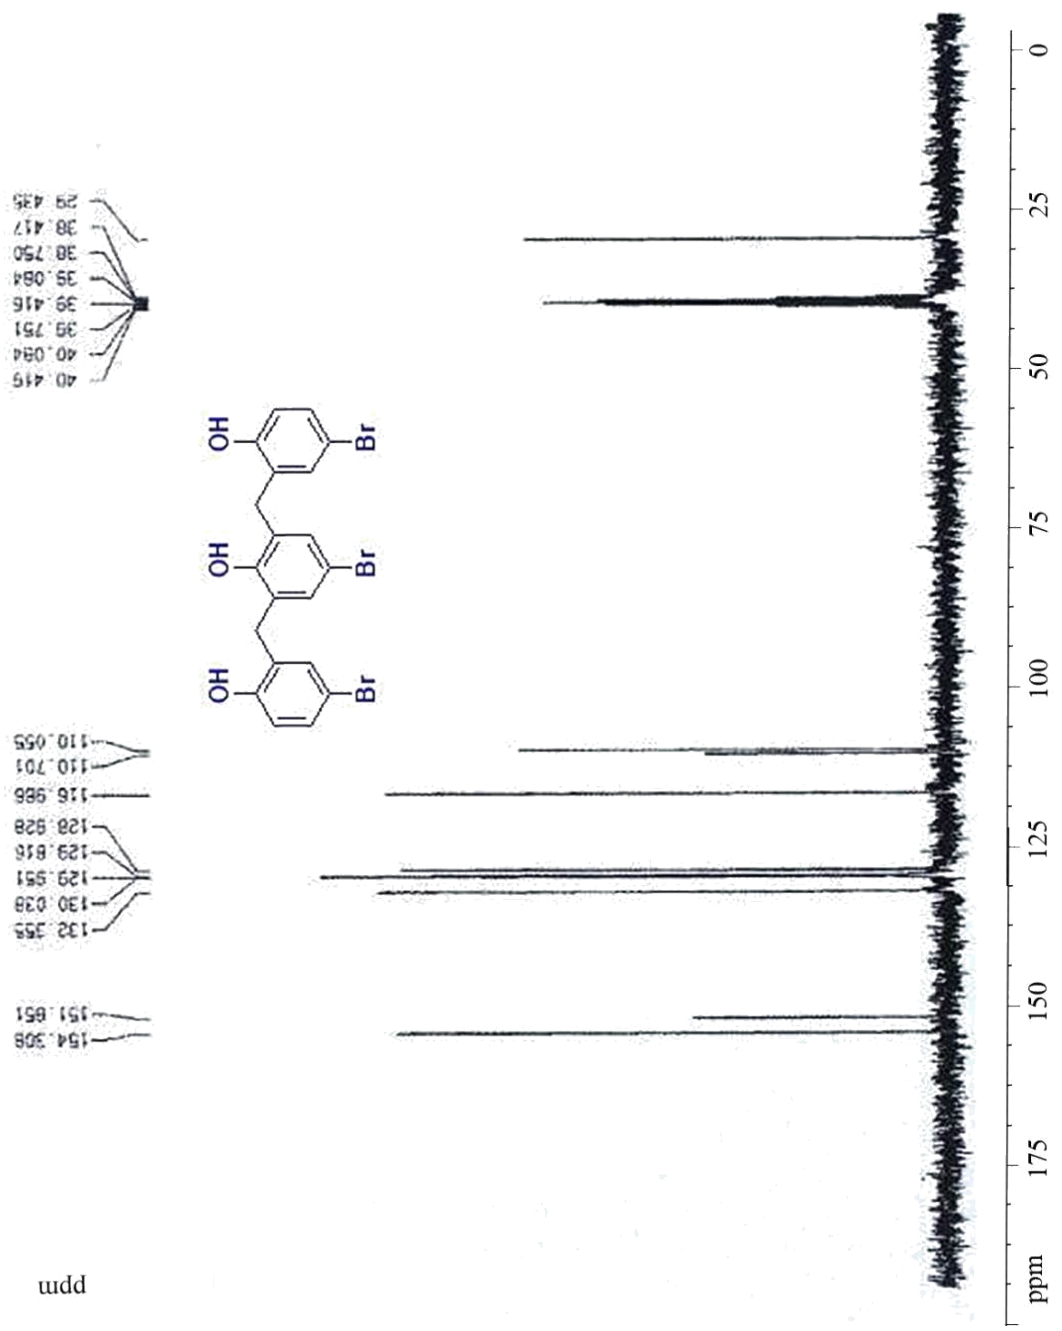

uudd

2,6-Bis-(5-bromo-2-hydroxybenzyl)-4-chlorophenol (Compound C11)

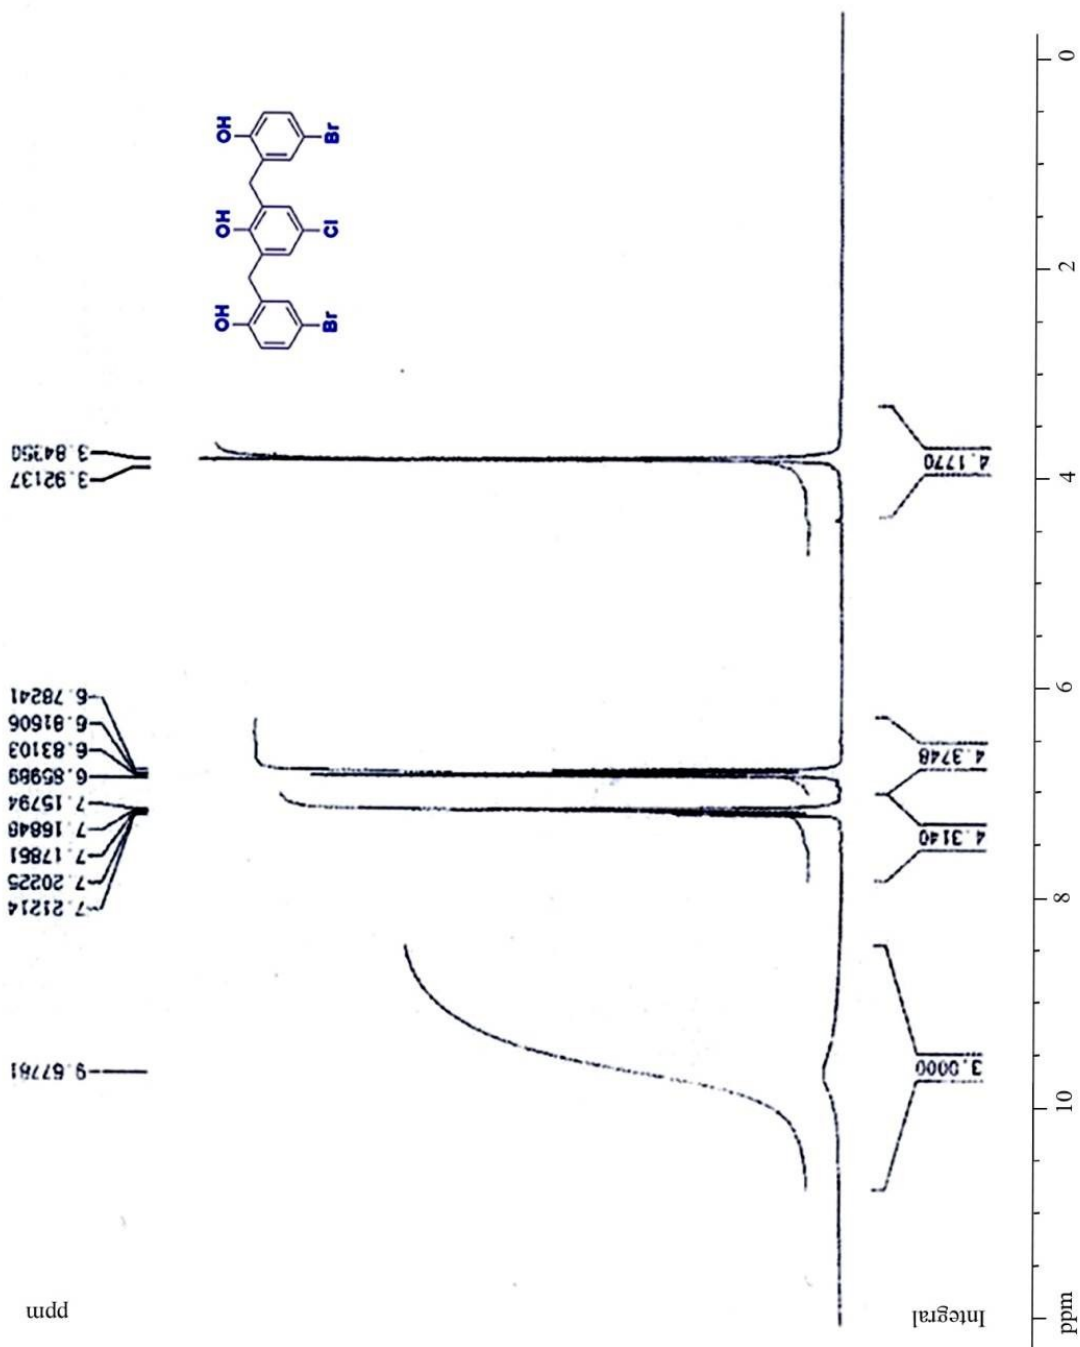



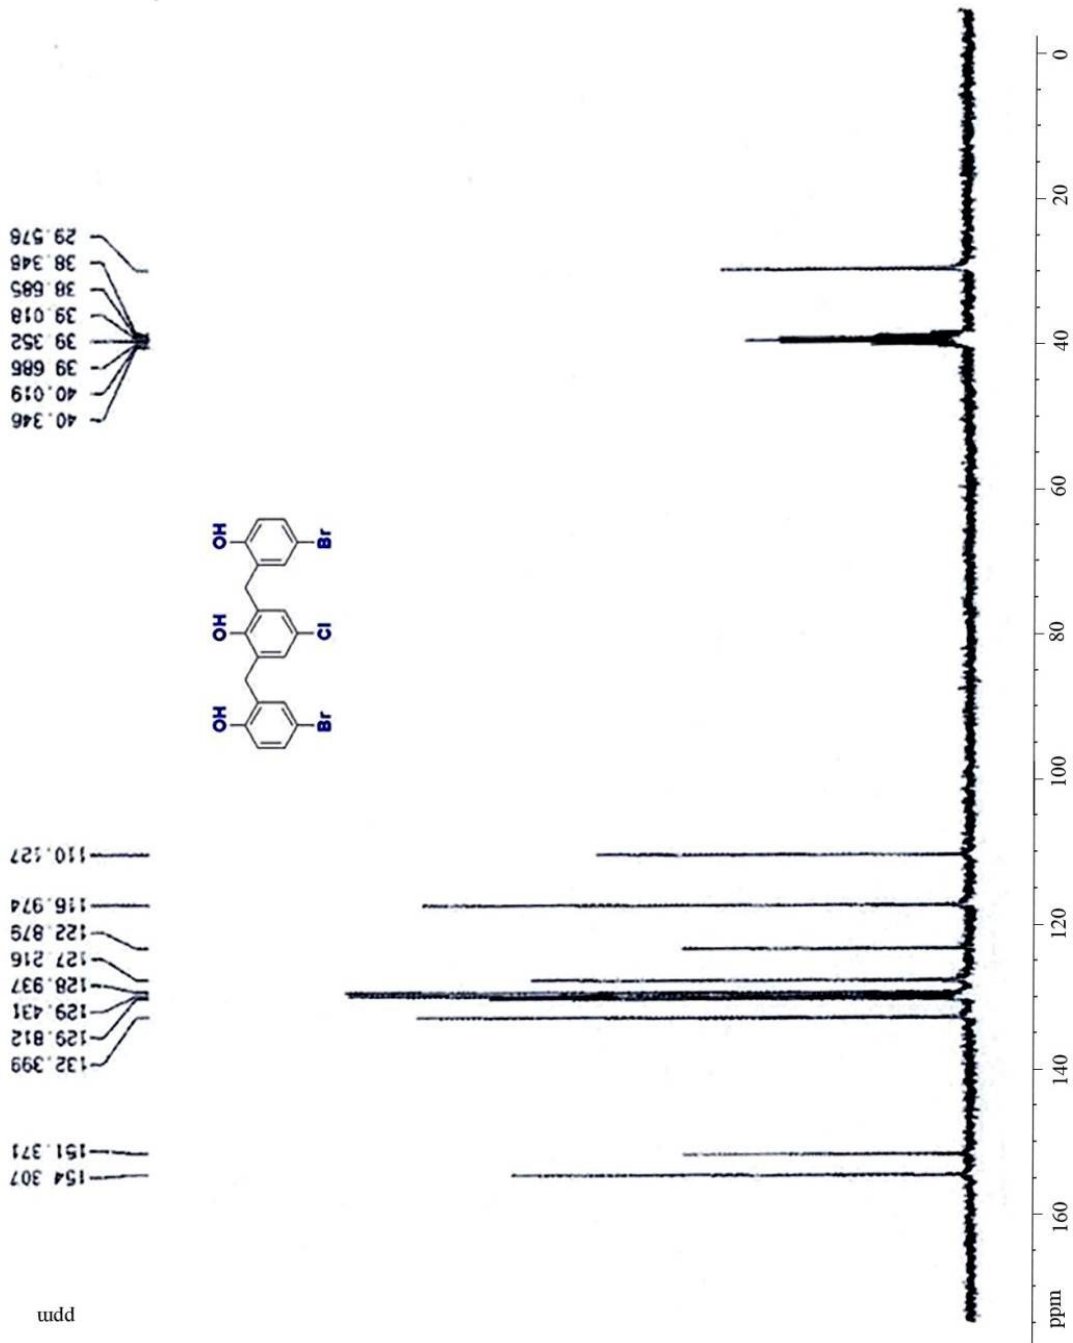

**2,6-Bis-(5-fluoro-2-hydroxybenzyl)-4-fluorophenol (Compound C12)**

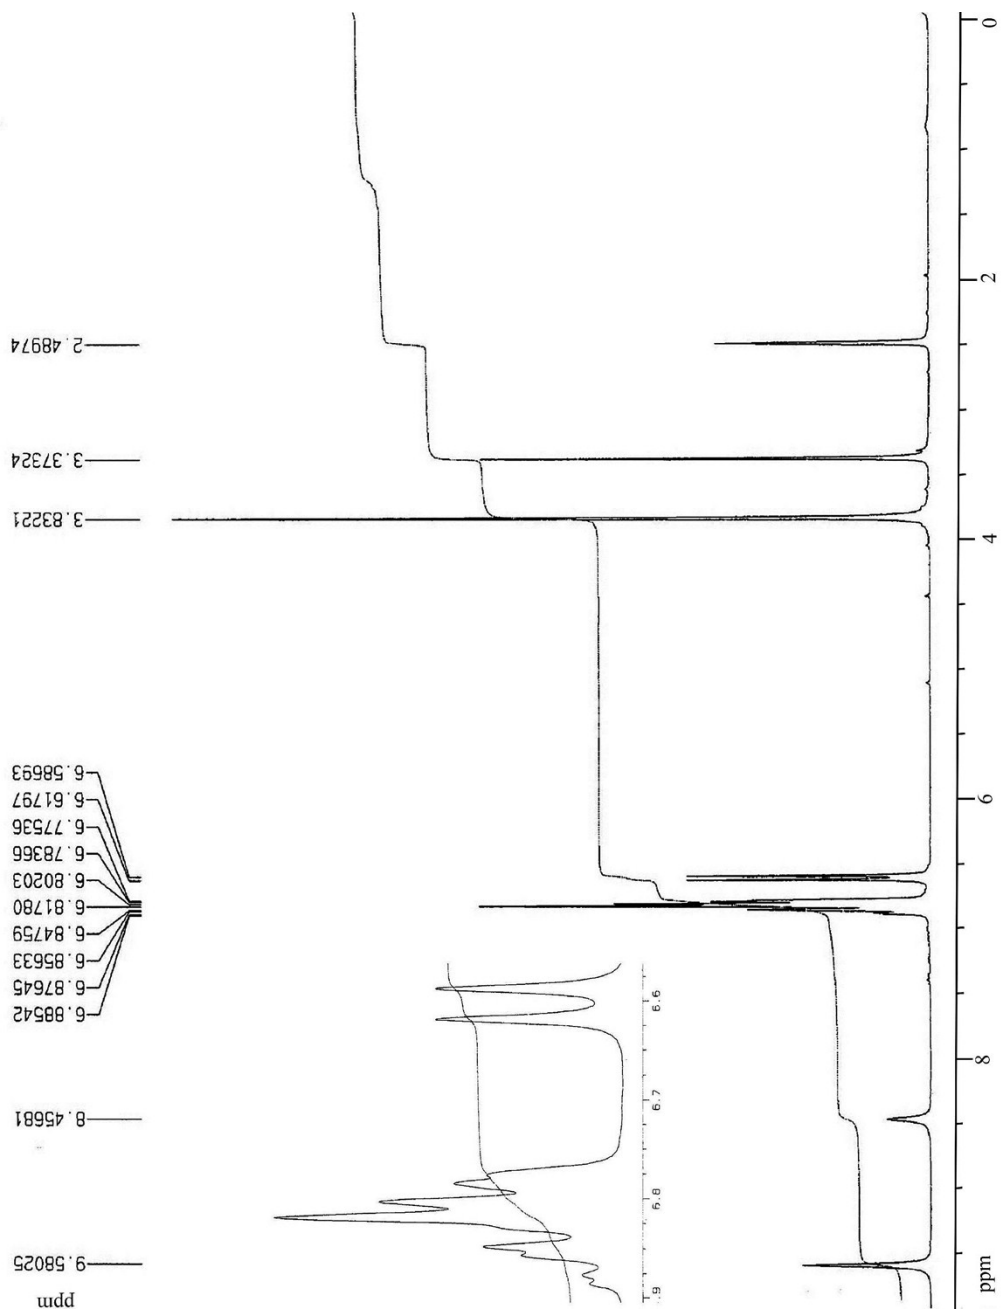

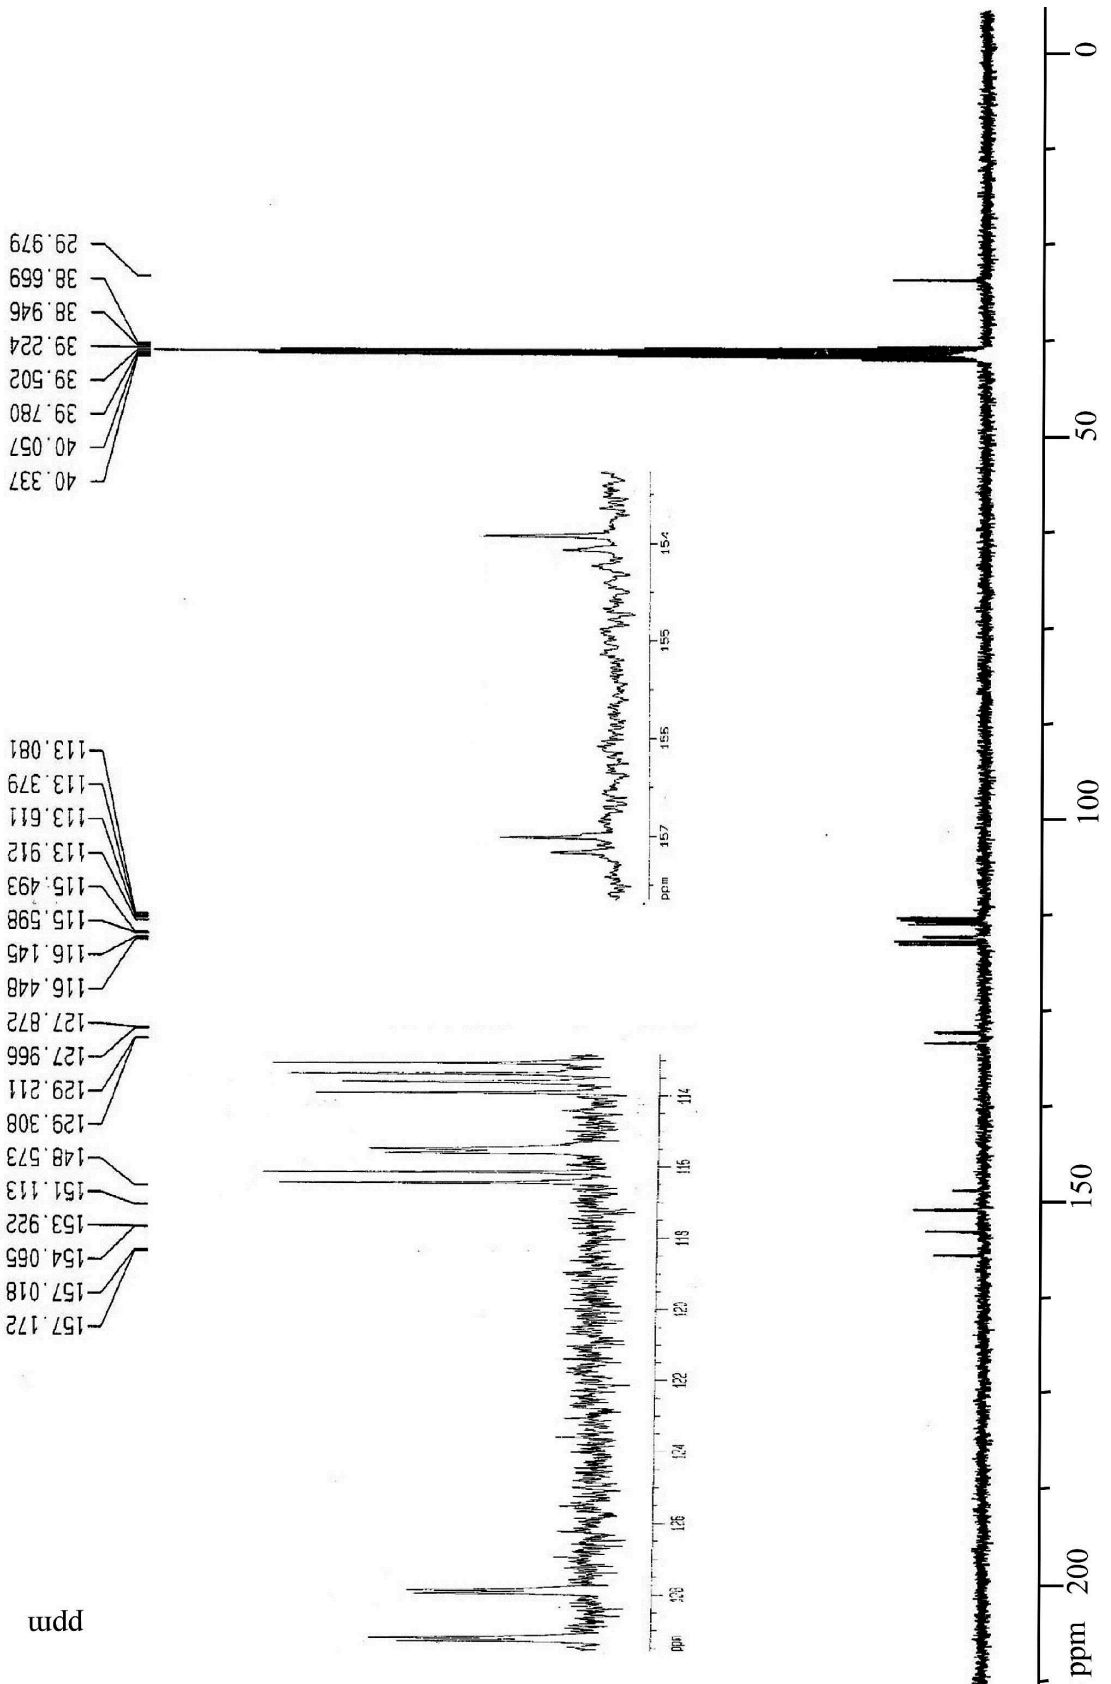

2,6-Bis-(5-chloro-2-hydroxybenzyl)-4-methylphenol (Compound C13)

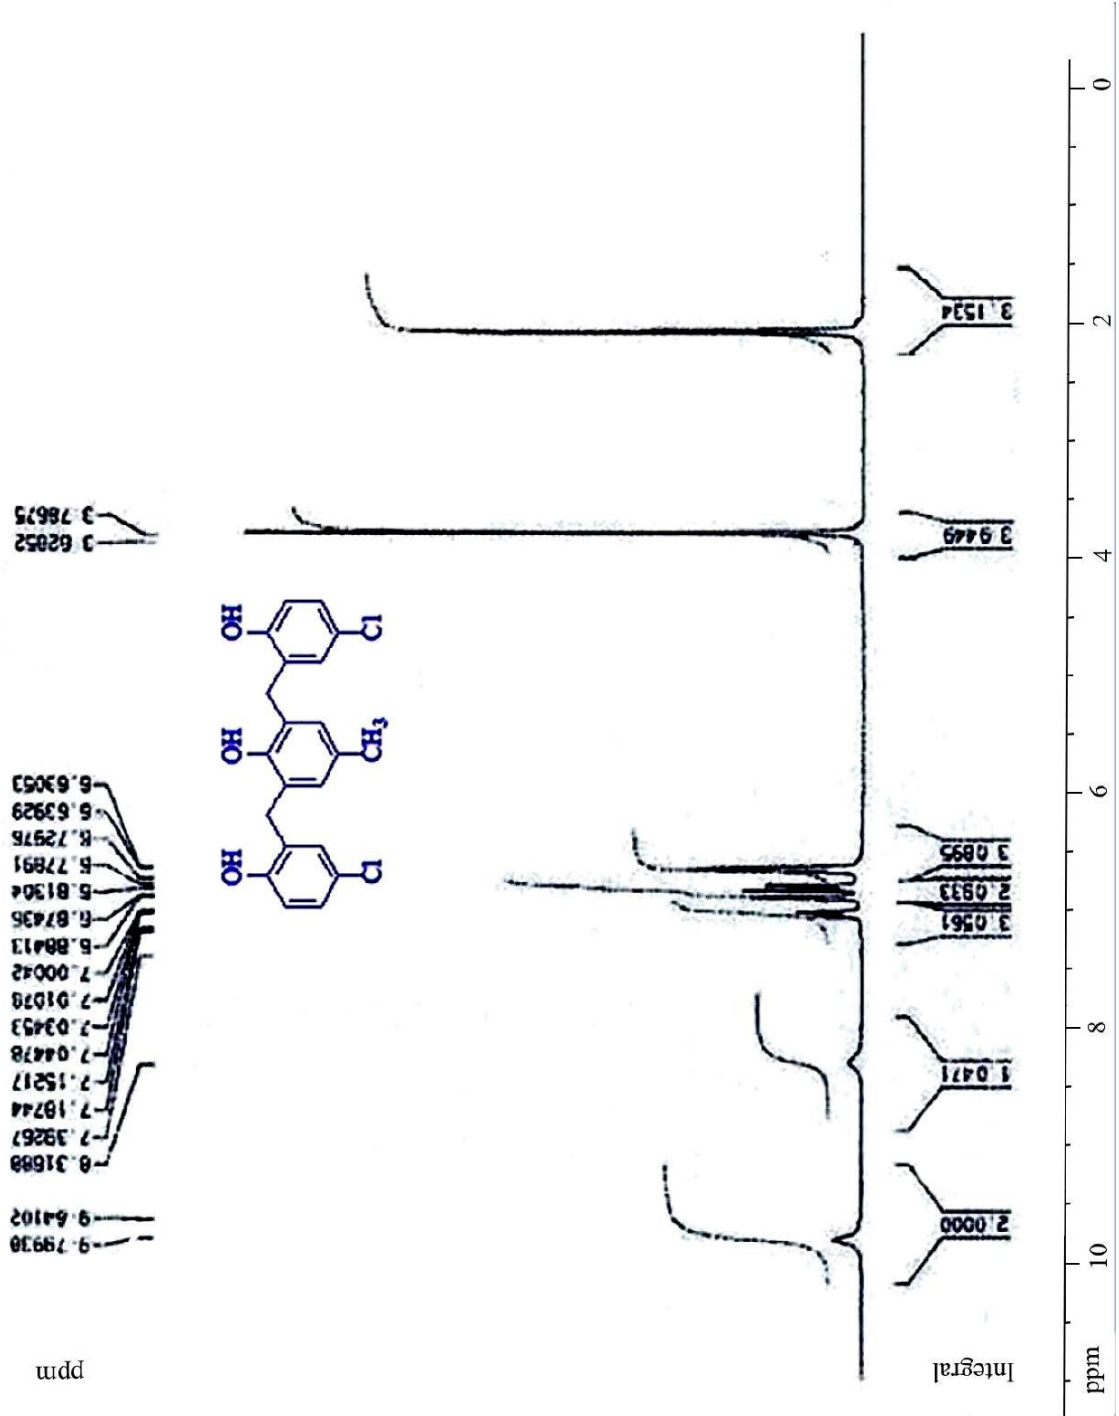

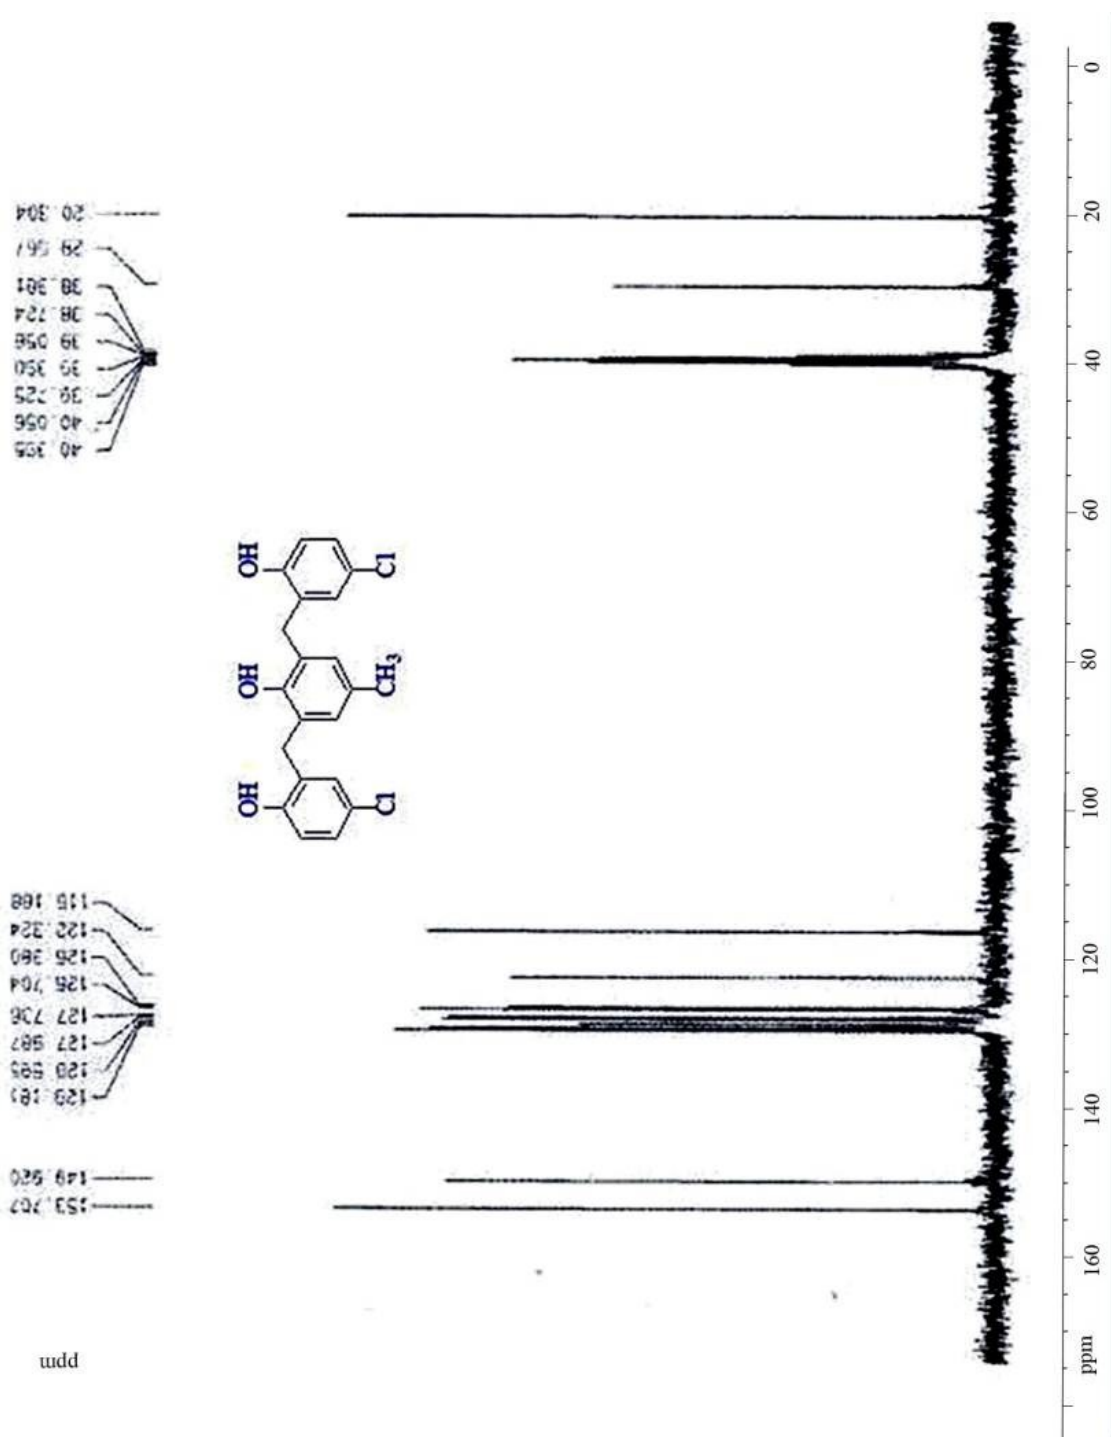

ppm

2,6-Bis-(2,5-dihydroxybenzyl)-4-chlorophenol (Compound C14)

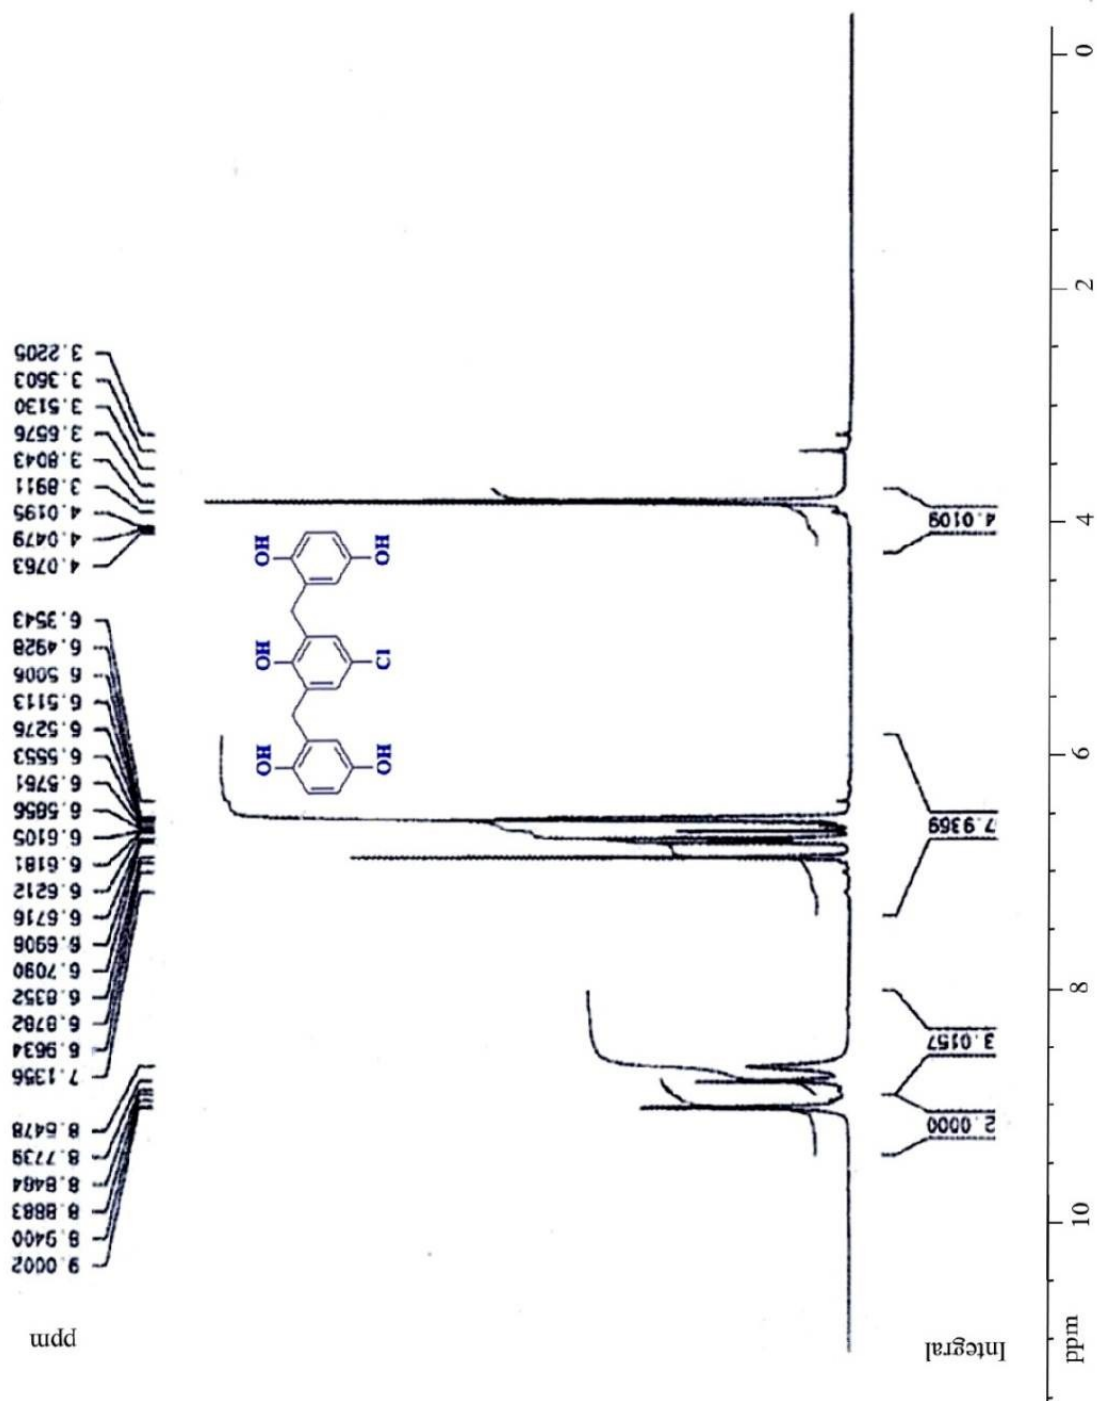

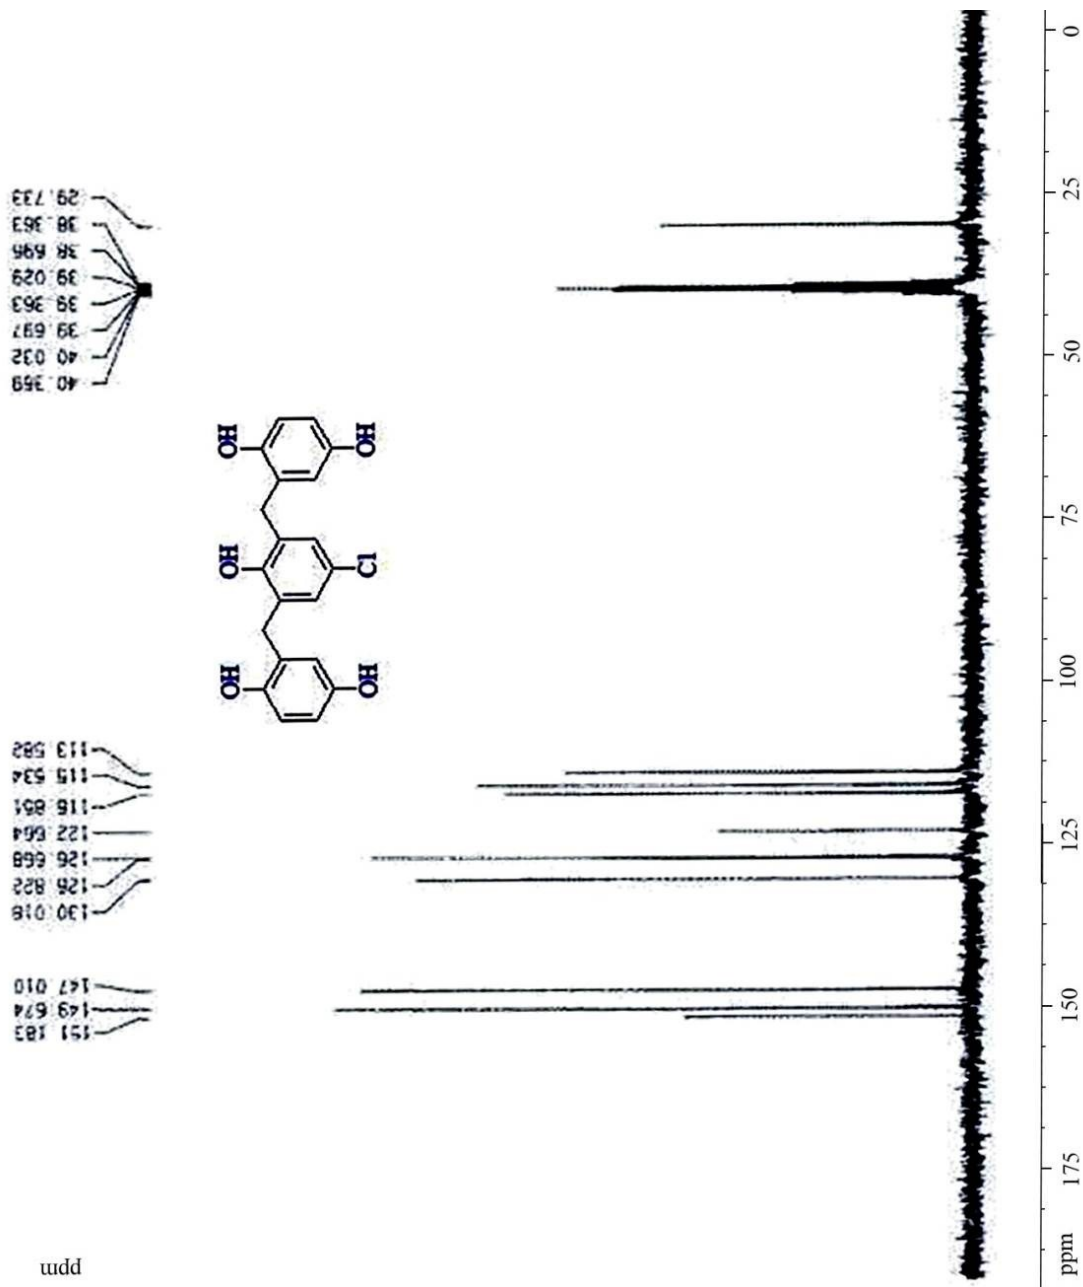

tudd

2,6-Bis-(2-hydroxy-5-nitrobenzyl)-4-chlorophenol (Compound C15)

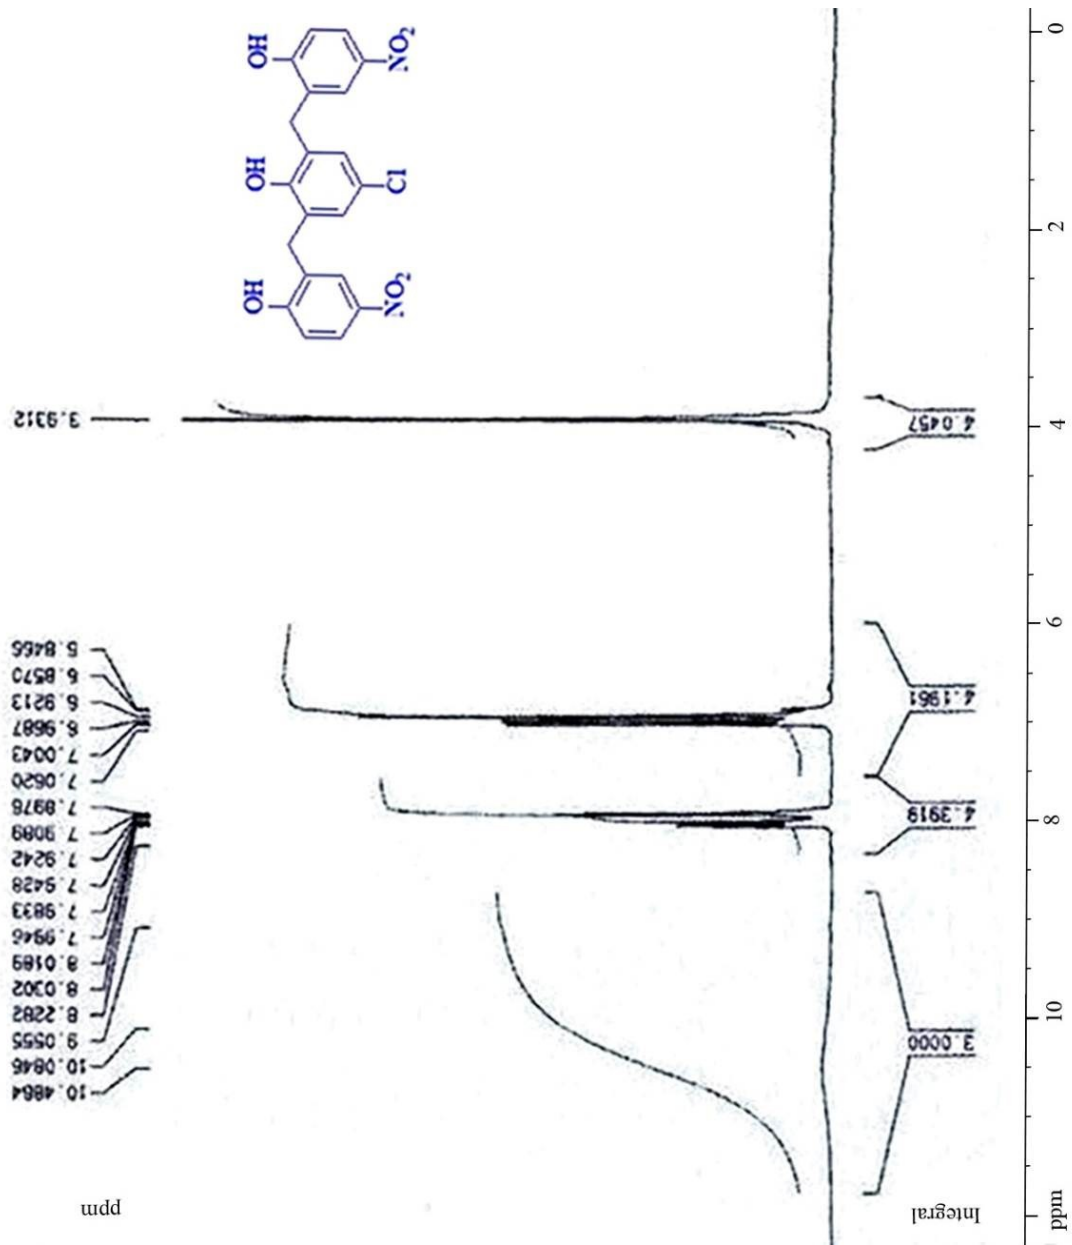



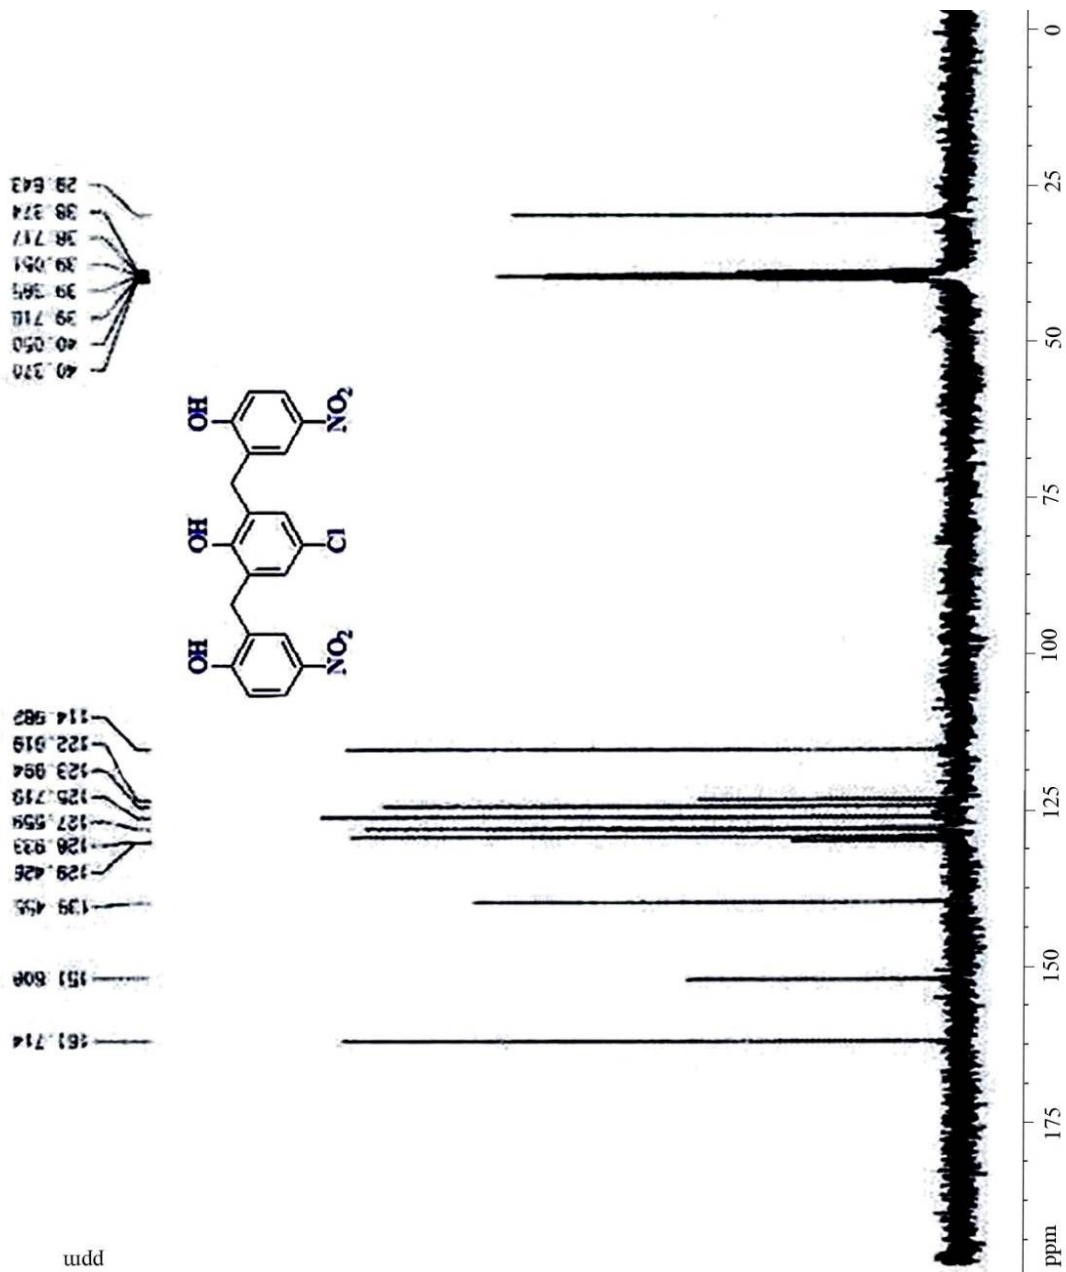

uidd

2,6-Bis-(2-hydroxy-5-phenylbenzyl)-4-chlorophenol (Compound C16)

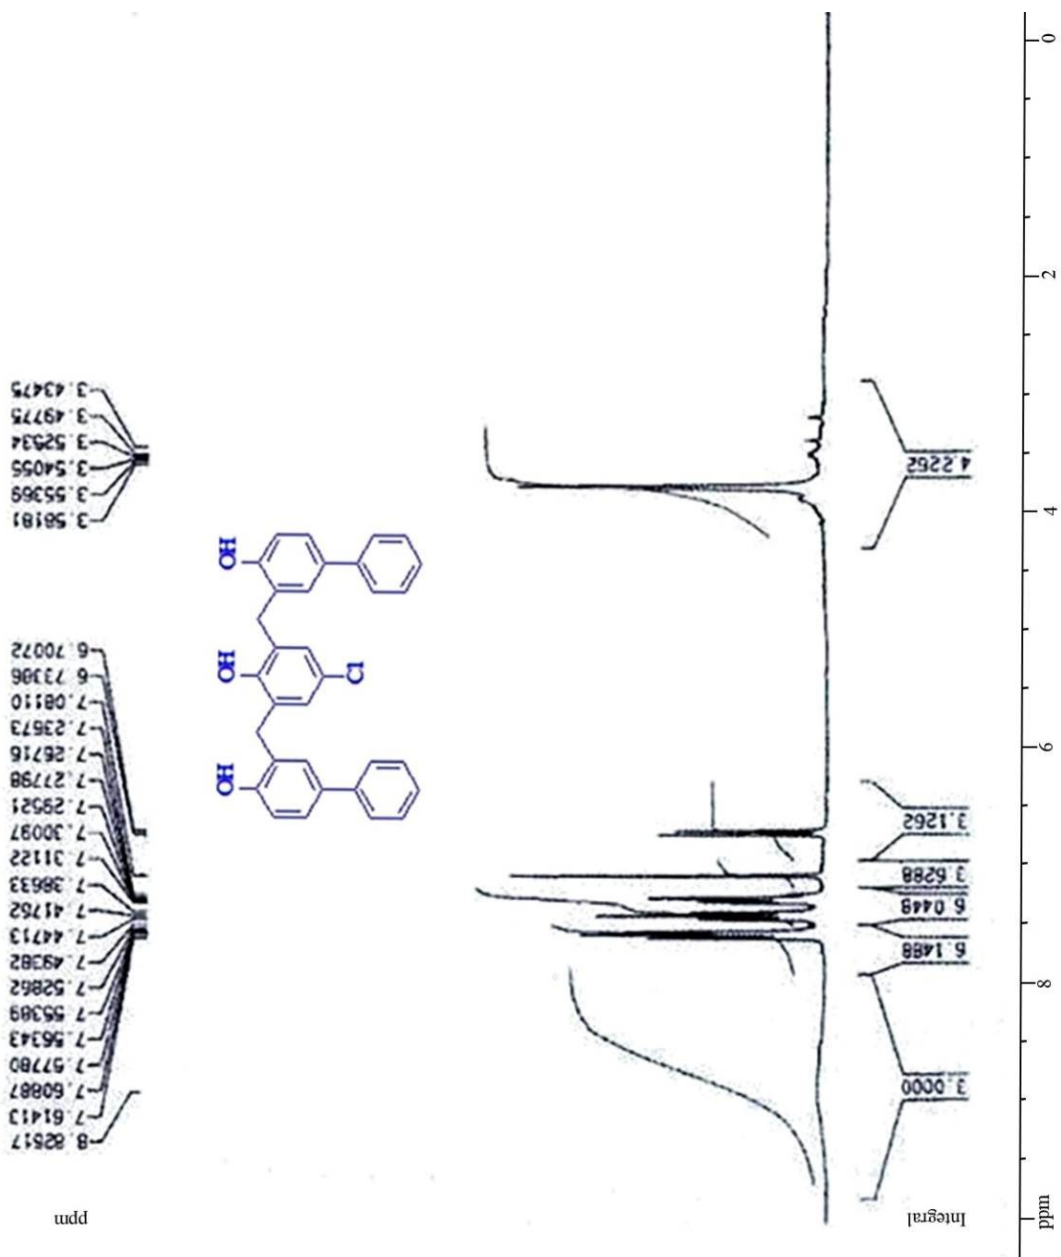

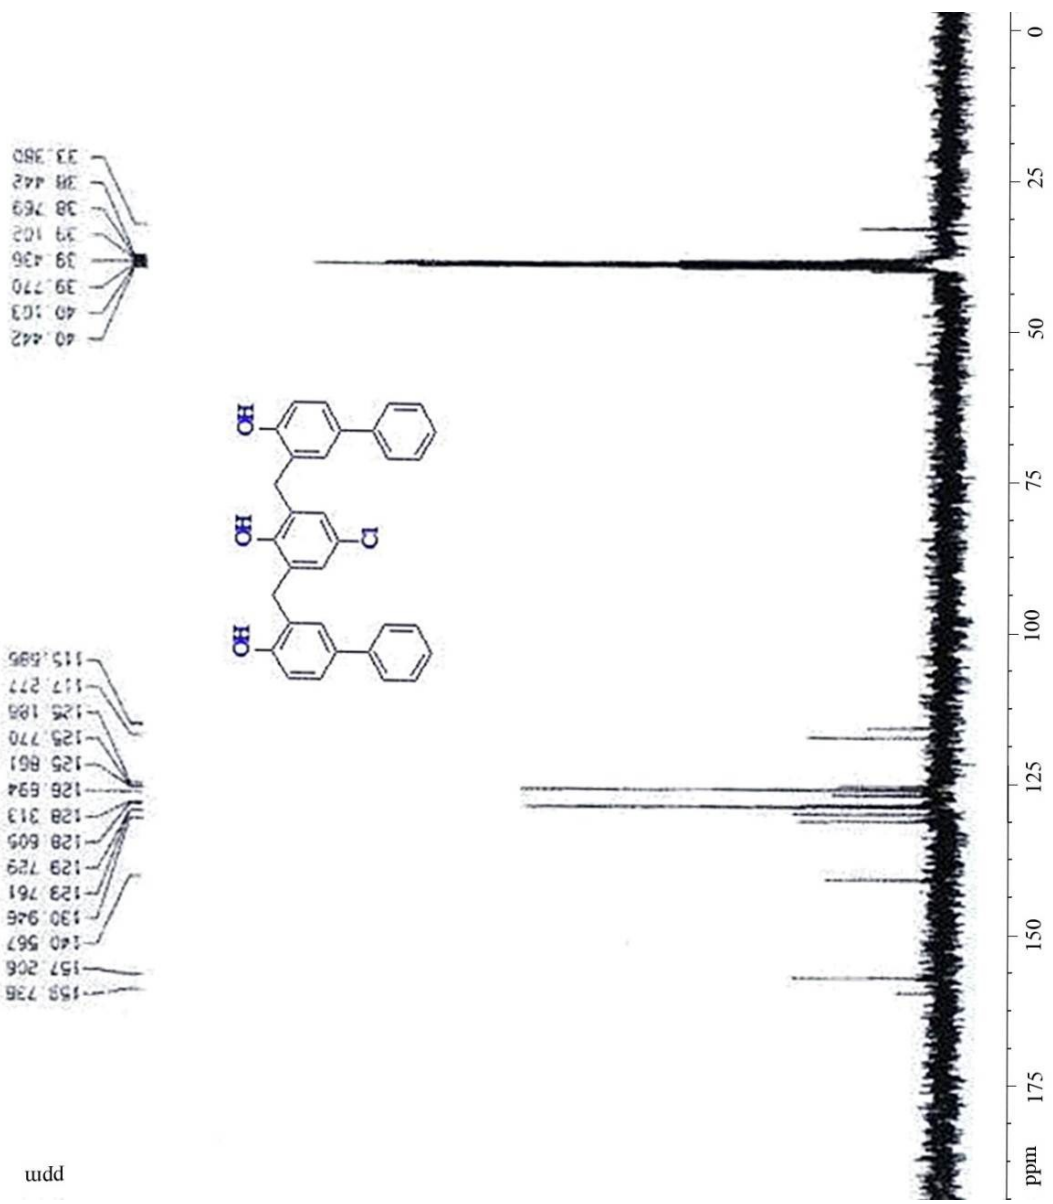

uudd

**6,6'-[(5-Chloro-2-hydroxy-1,3-phenylene)bis(methylene)]bis(4-allyl-2-methoxyphenol) (Compound C17)**

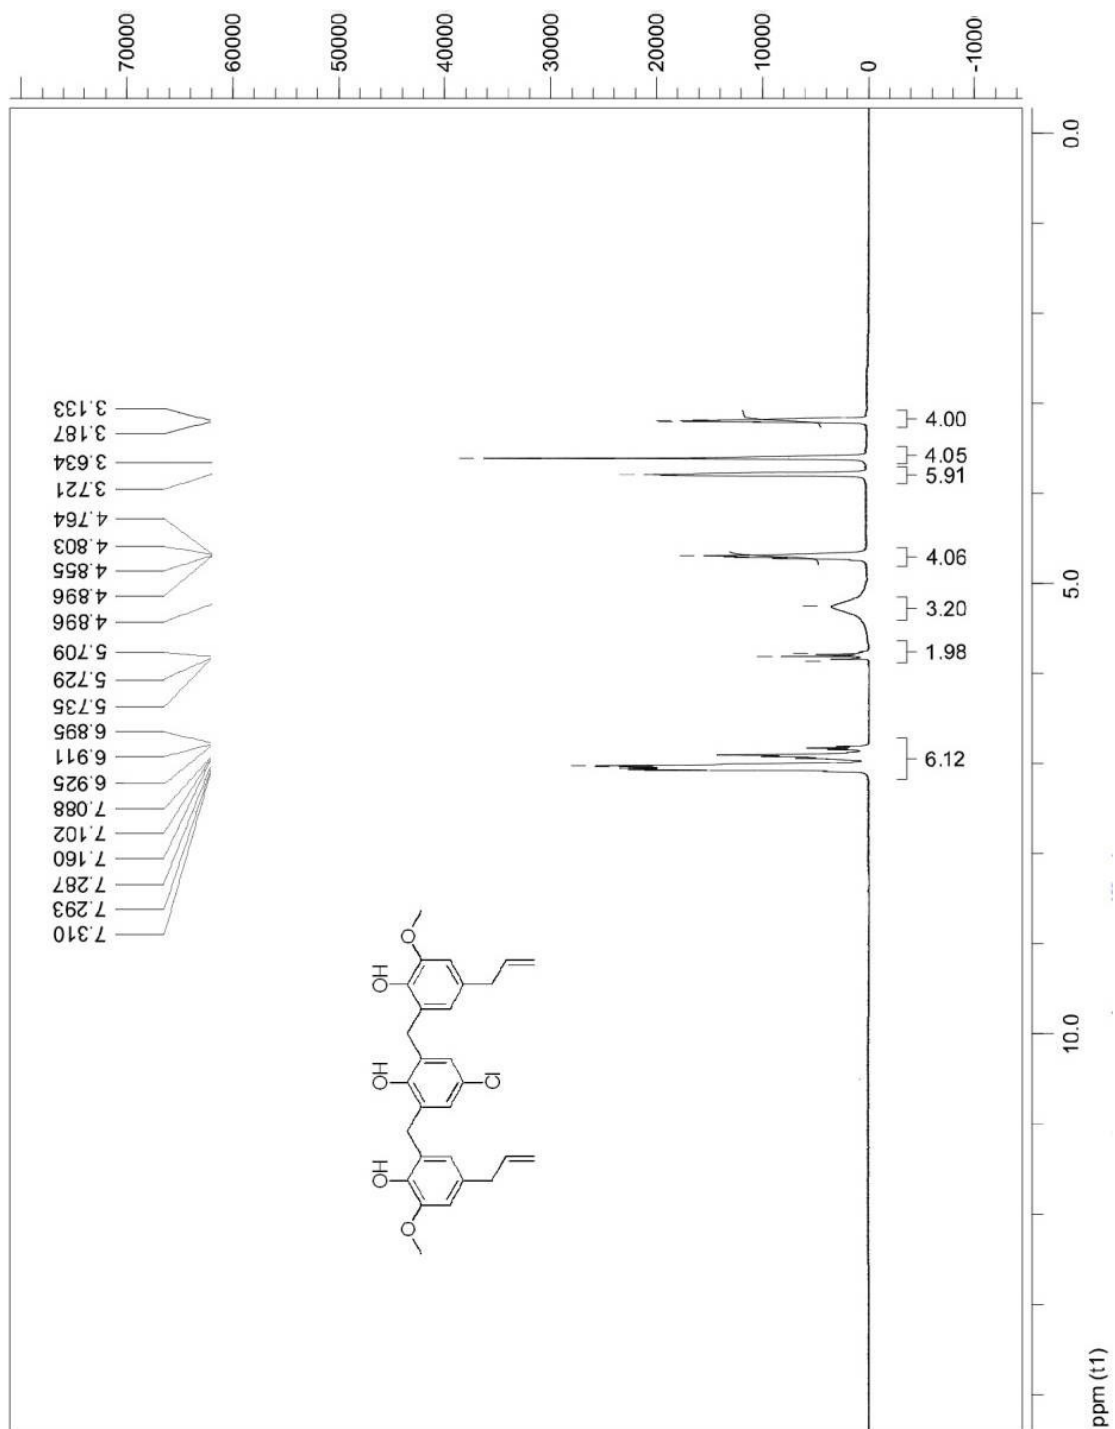

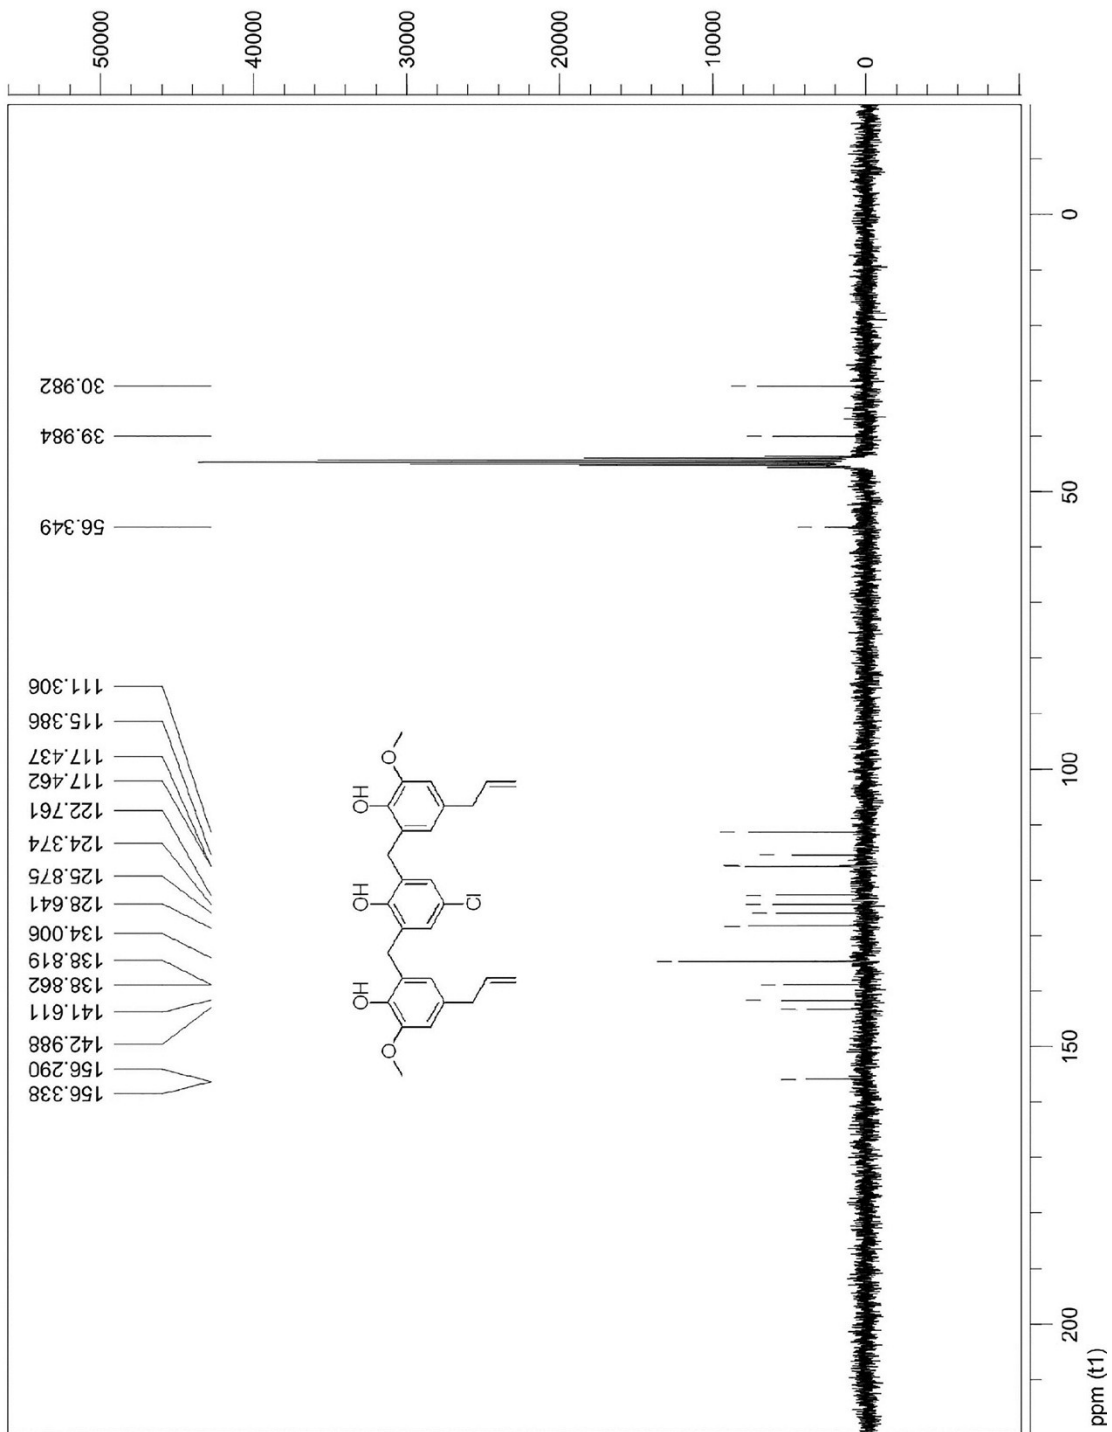

**6,6'-[(5-Bromo-2-hydroxy-1,3-phenylene)bis(methylene)]bis(4-allyl-2-methoxyphenol) (Compound C18)**

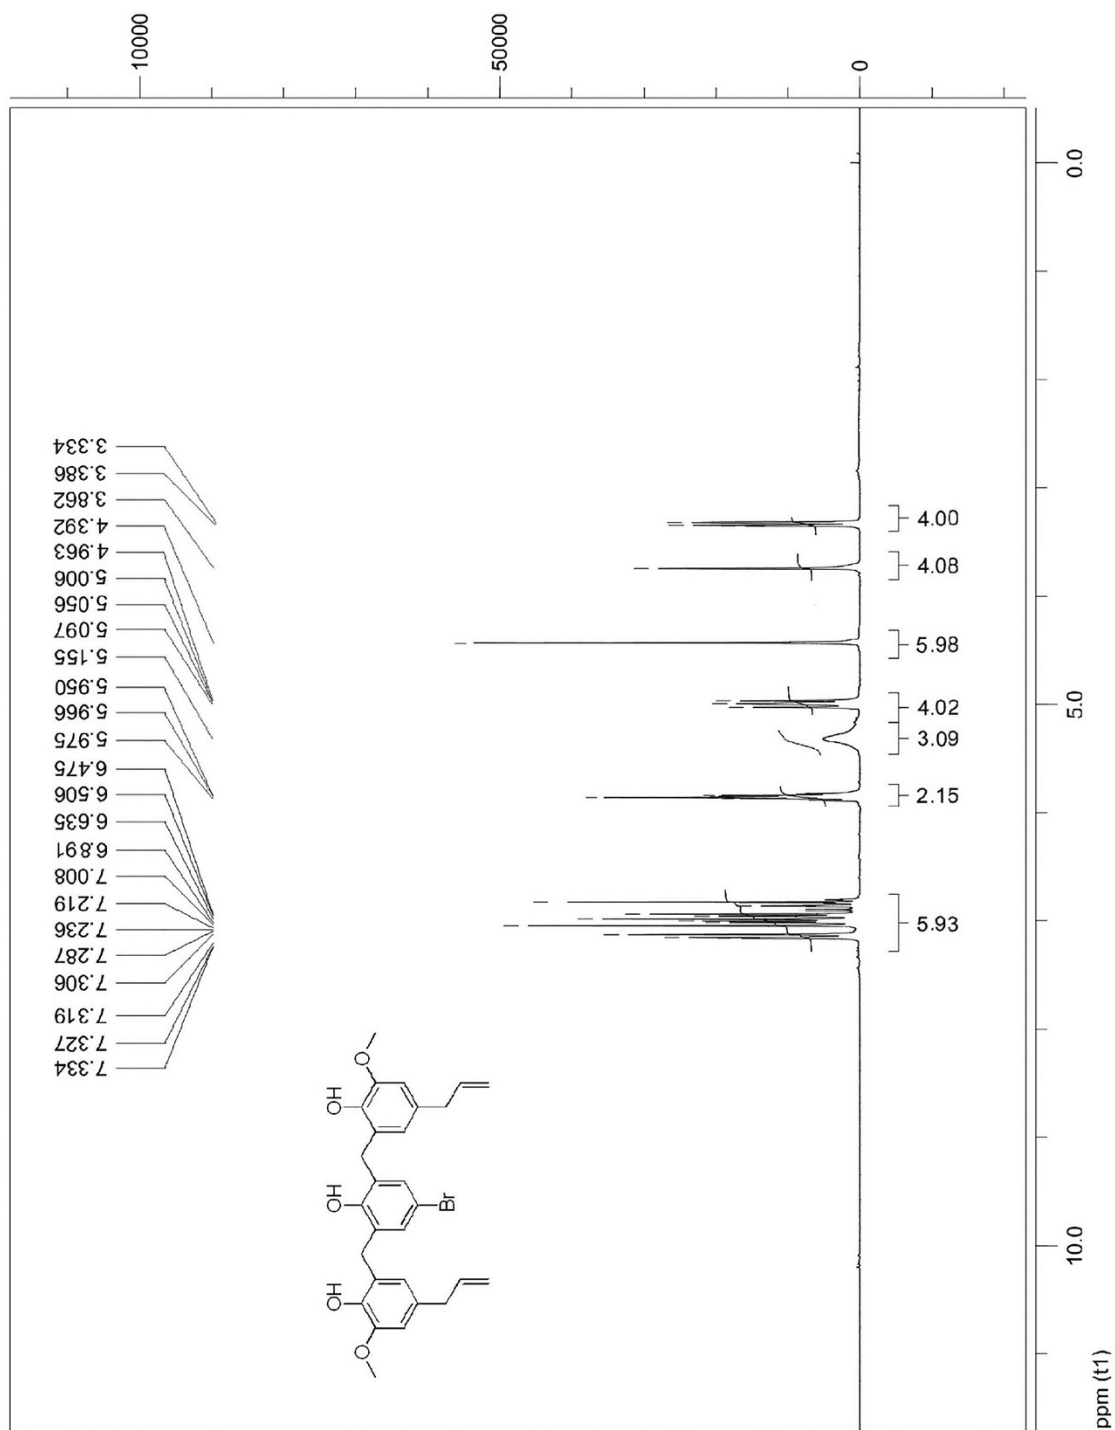

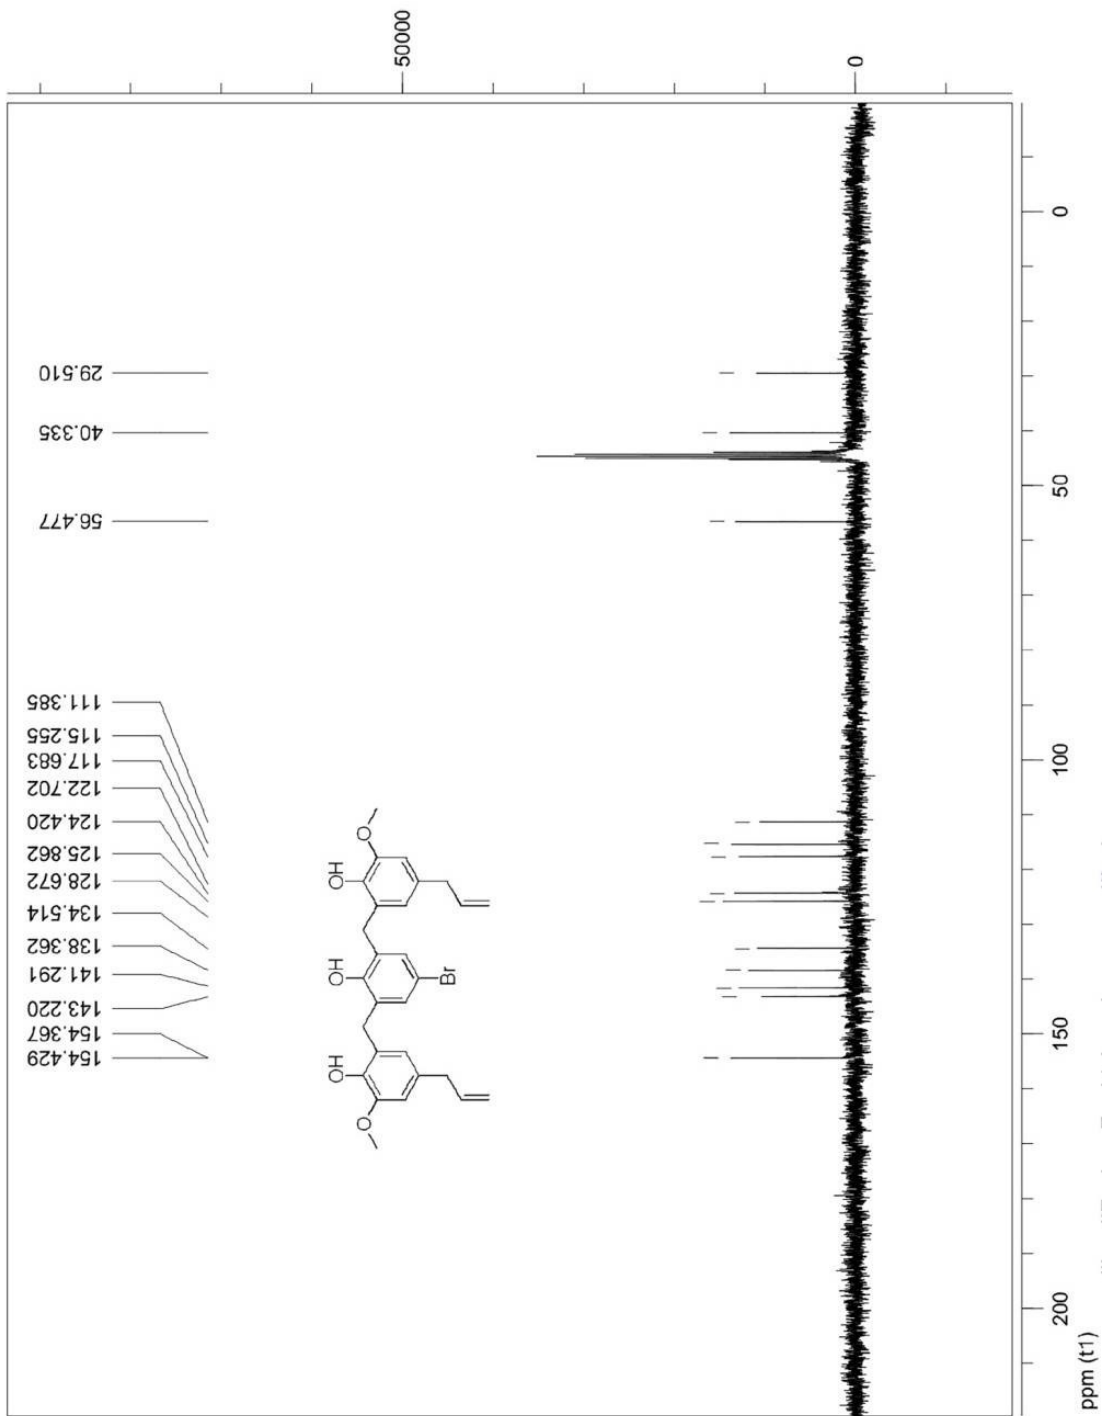

1,1'-{[(5-Fluoro-2-hydroxy-1,3-phenylene)bis(methylene)]bis(5-fluoro-2-hydroxy-3,1-phenylene)}bis(ethan-1-one) (Compound C19)

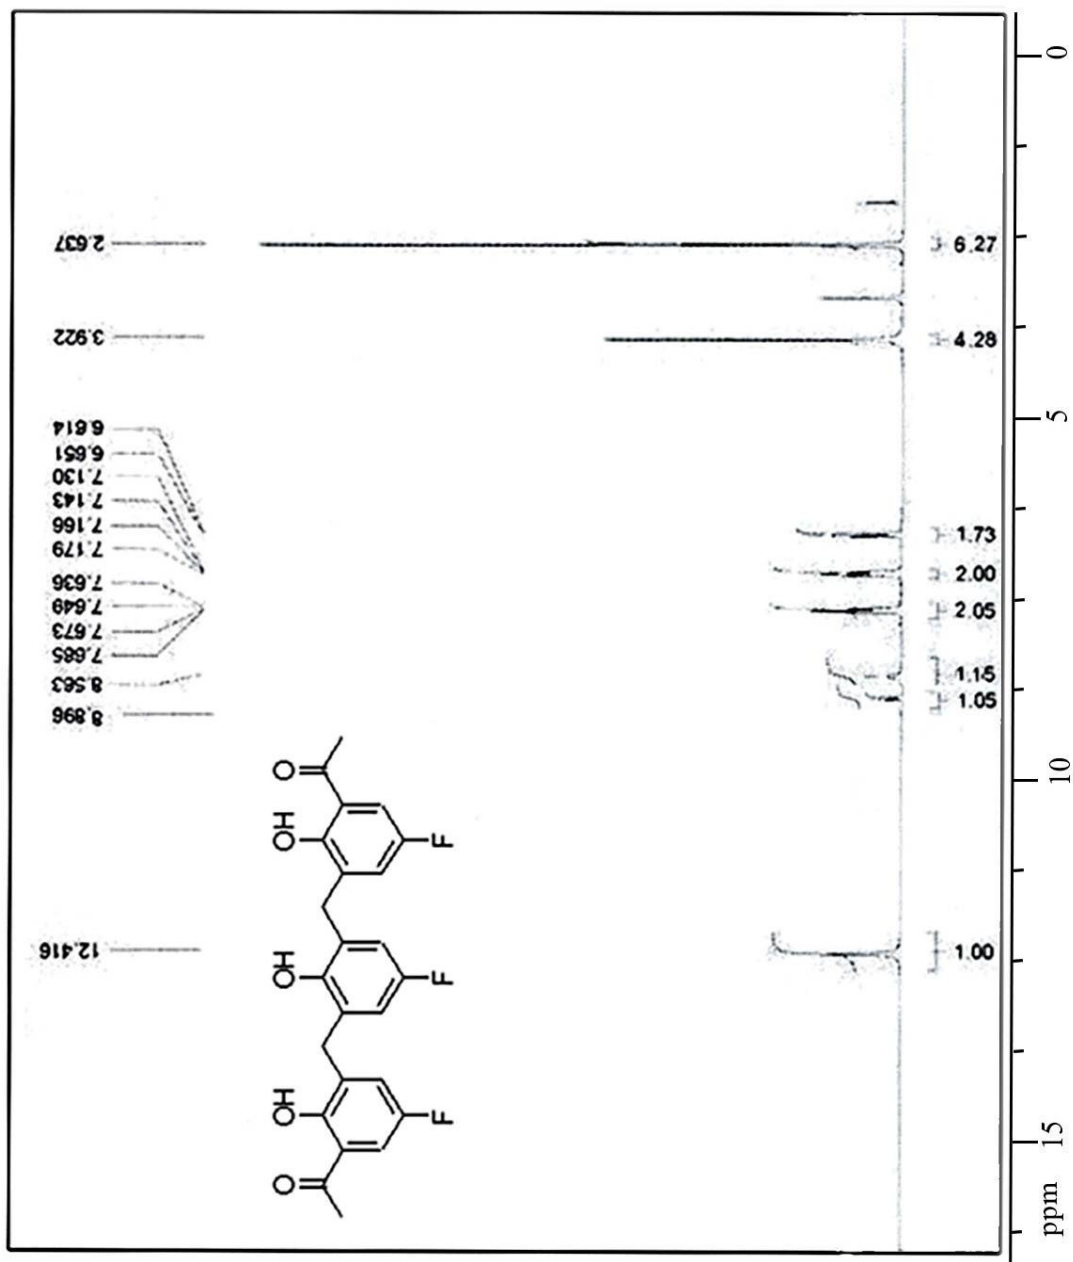



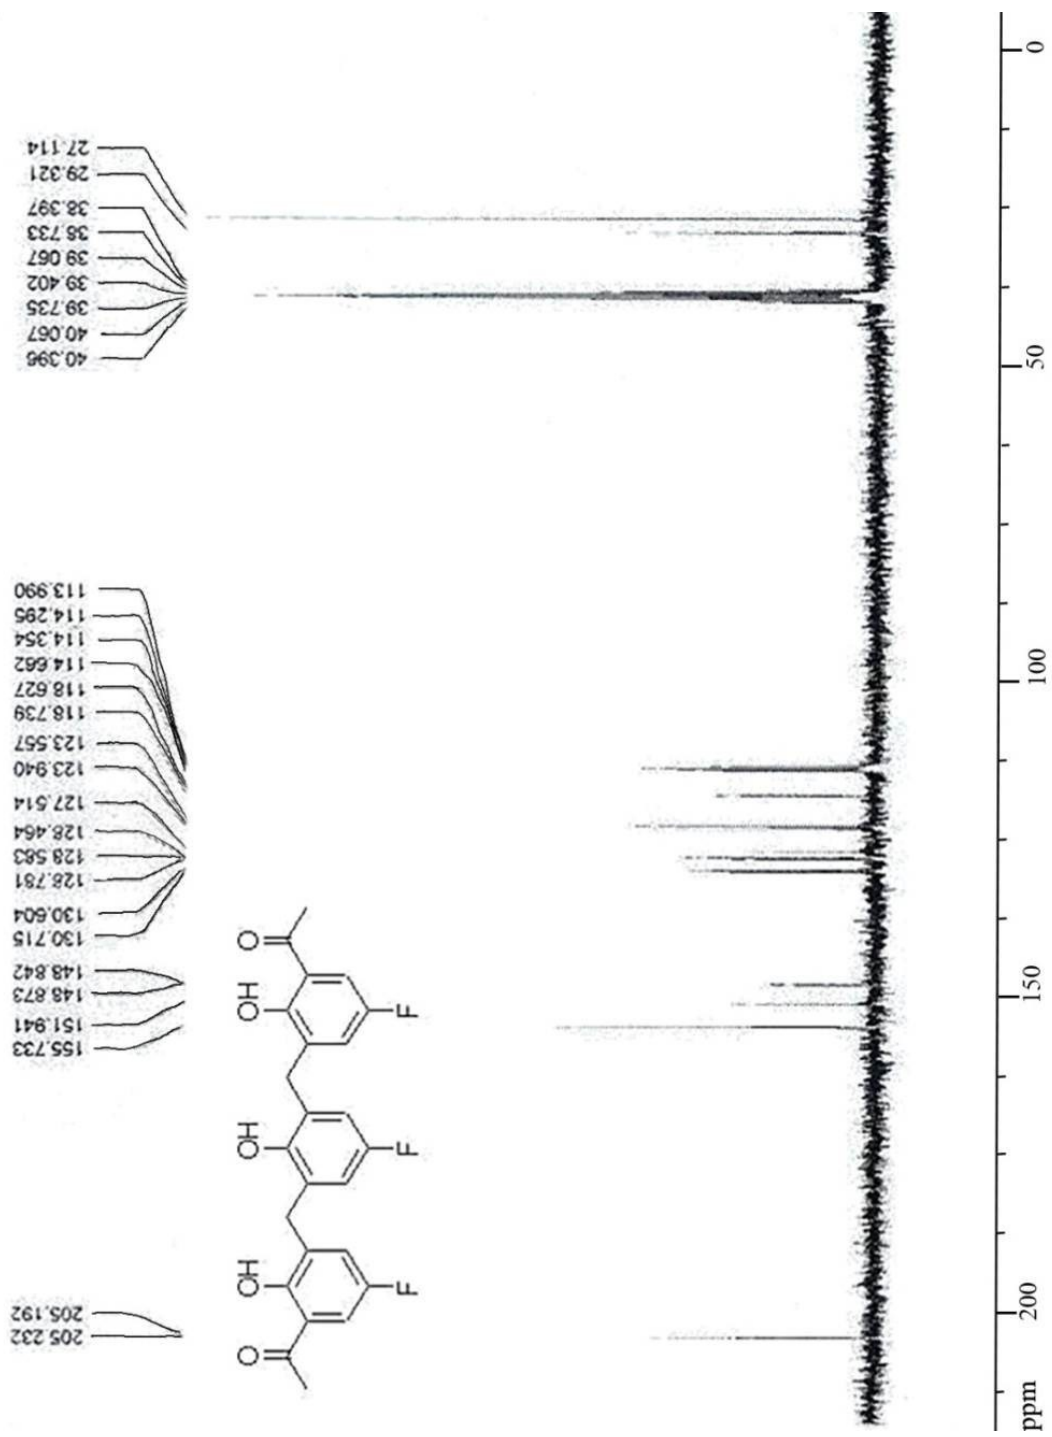

**6,6'-[(5-Chloro-2-hydroxy-1,3-phenylene)bis(methylene)]bis(2-*tert*-butyl-4-methylphenol) (Compound C20)**

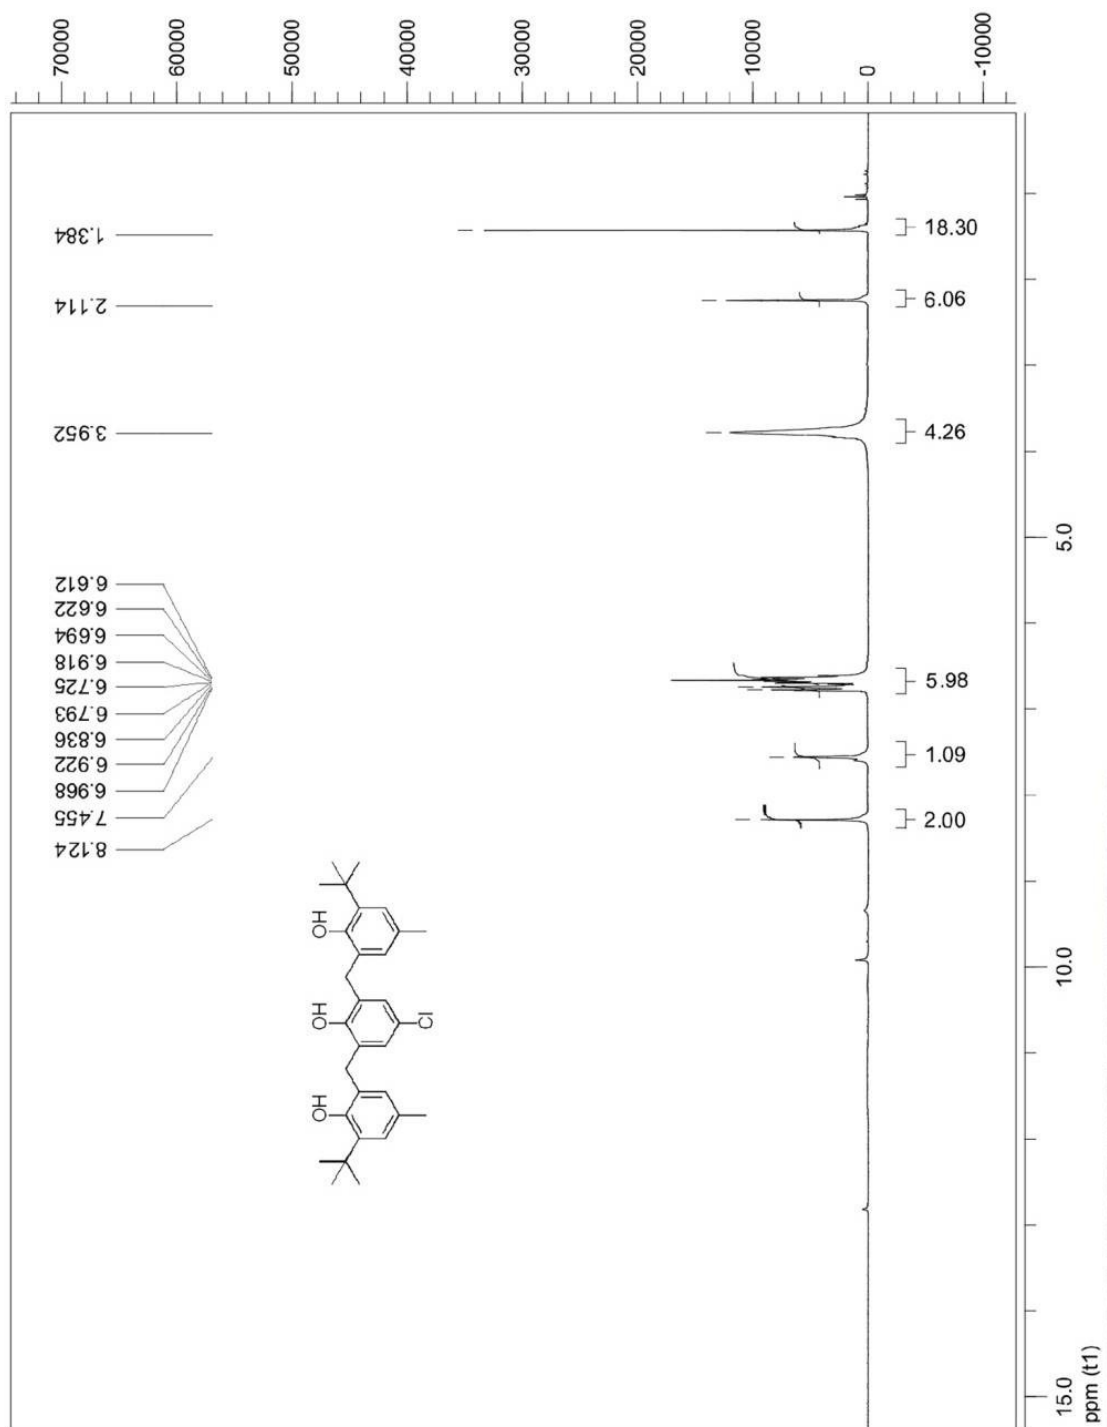

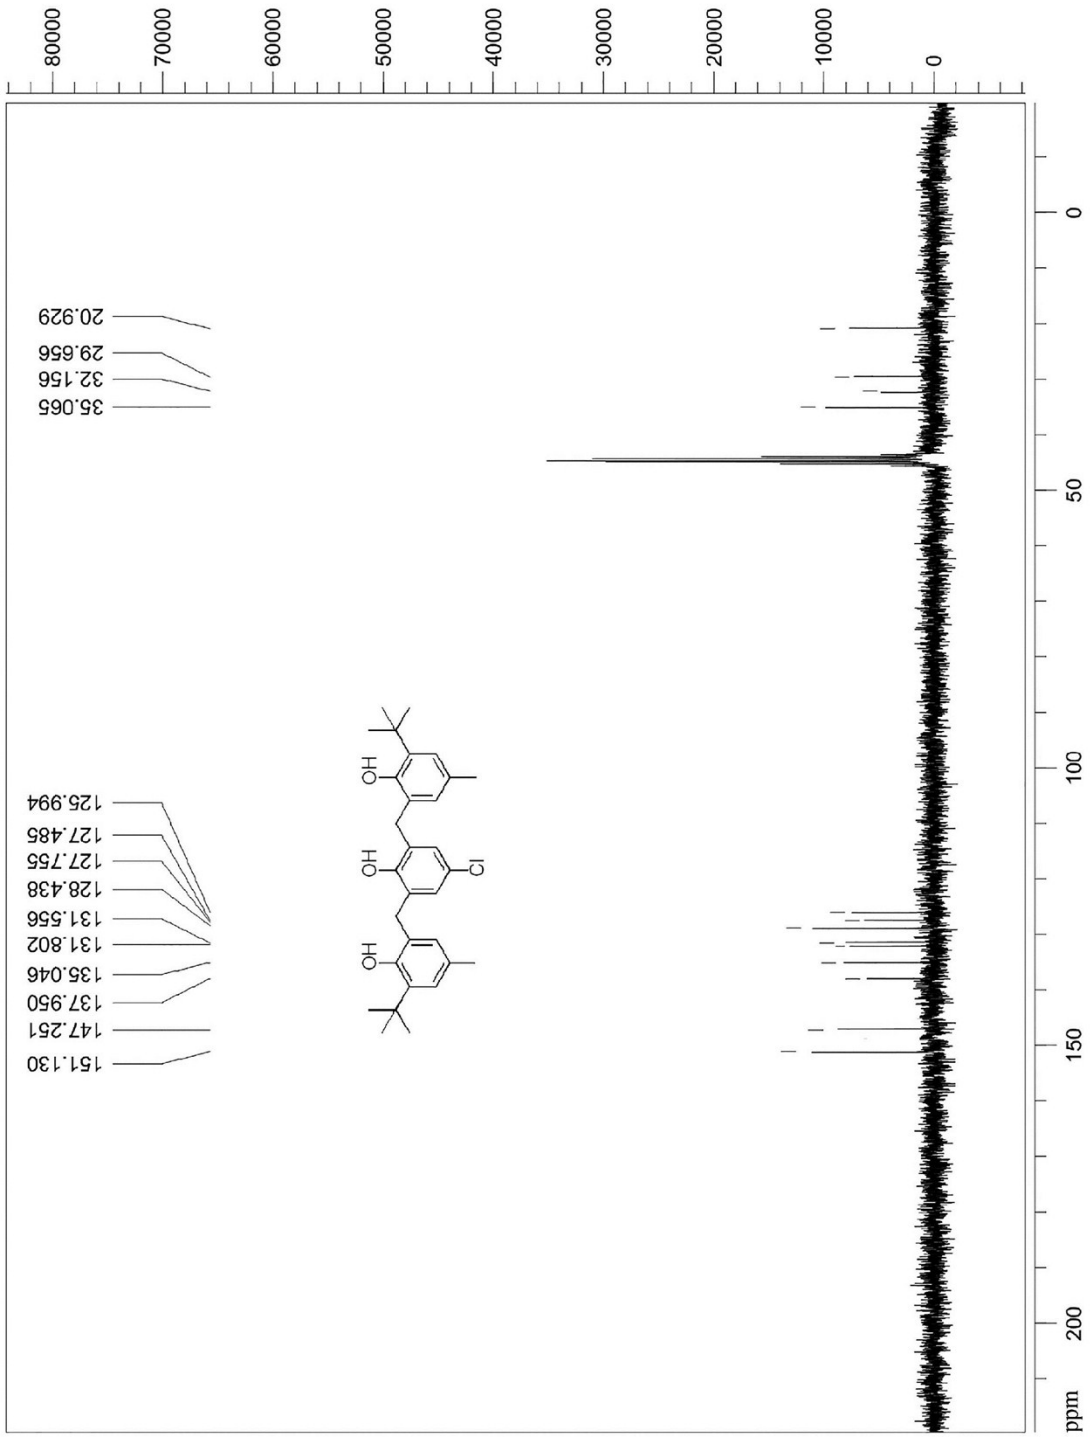

2,6-Bis-(2-hydroxy-5-*tert*-butylbenzyl)-4-*tert*-butylphenol (Compound C21)

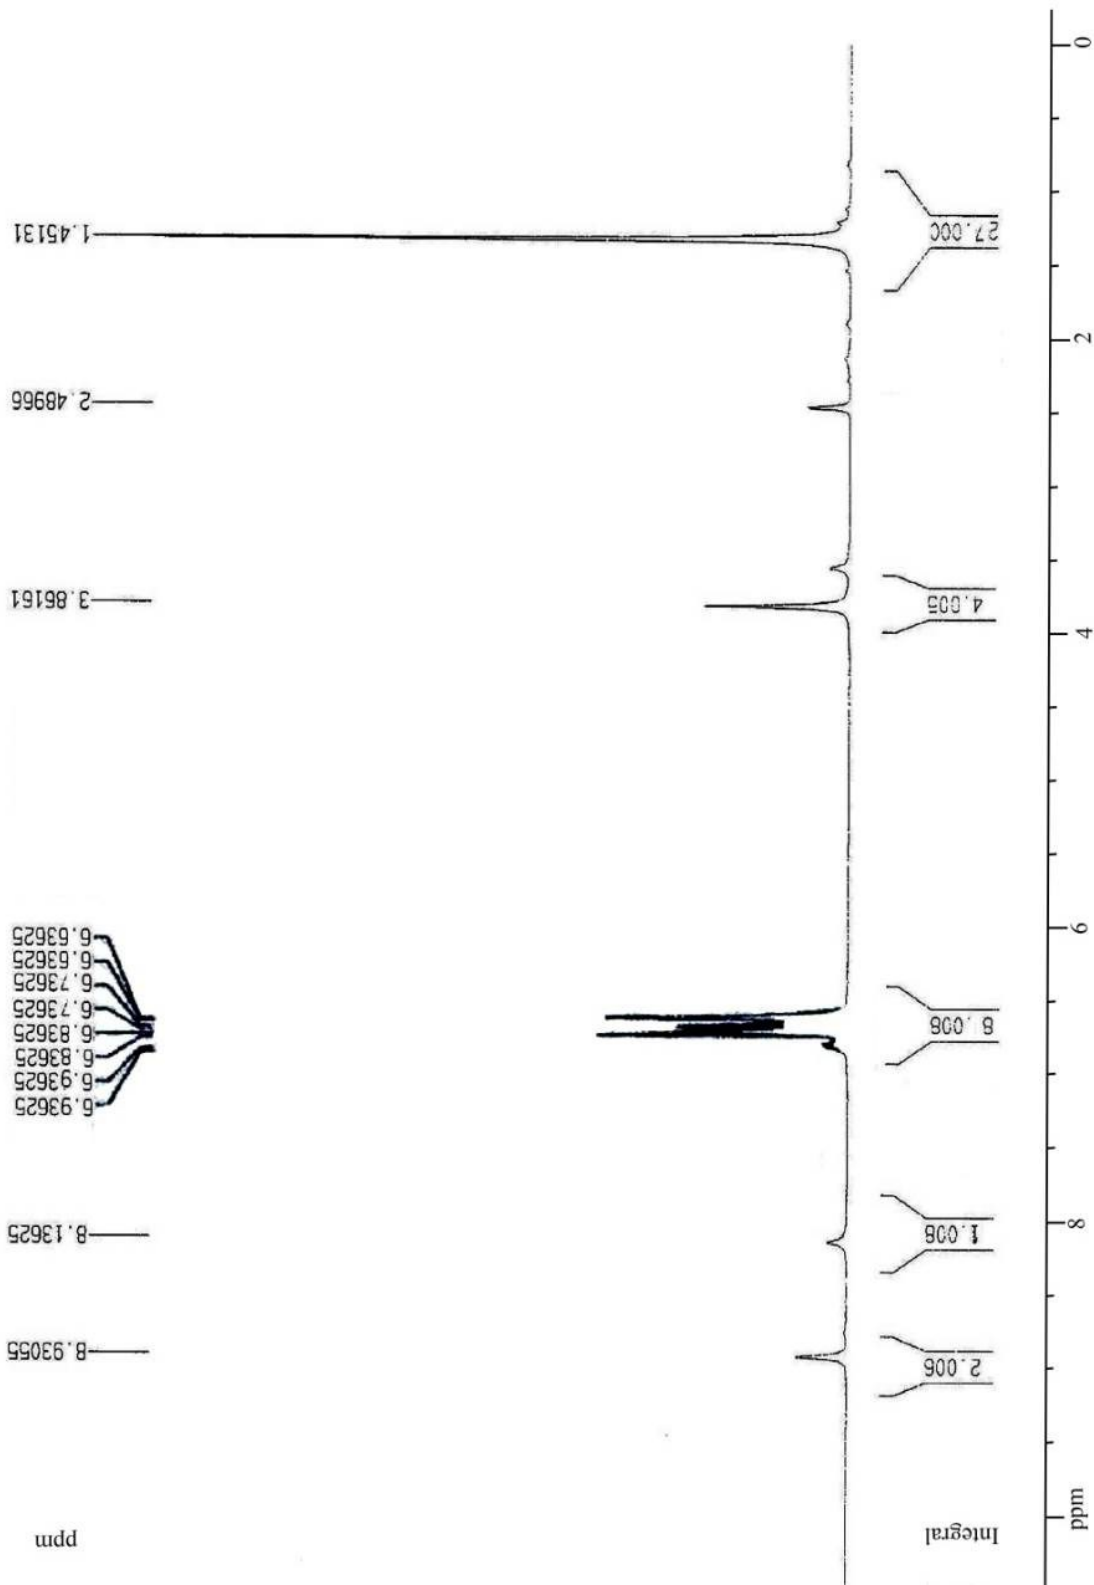

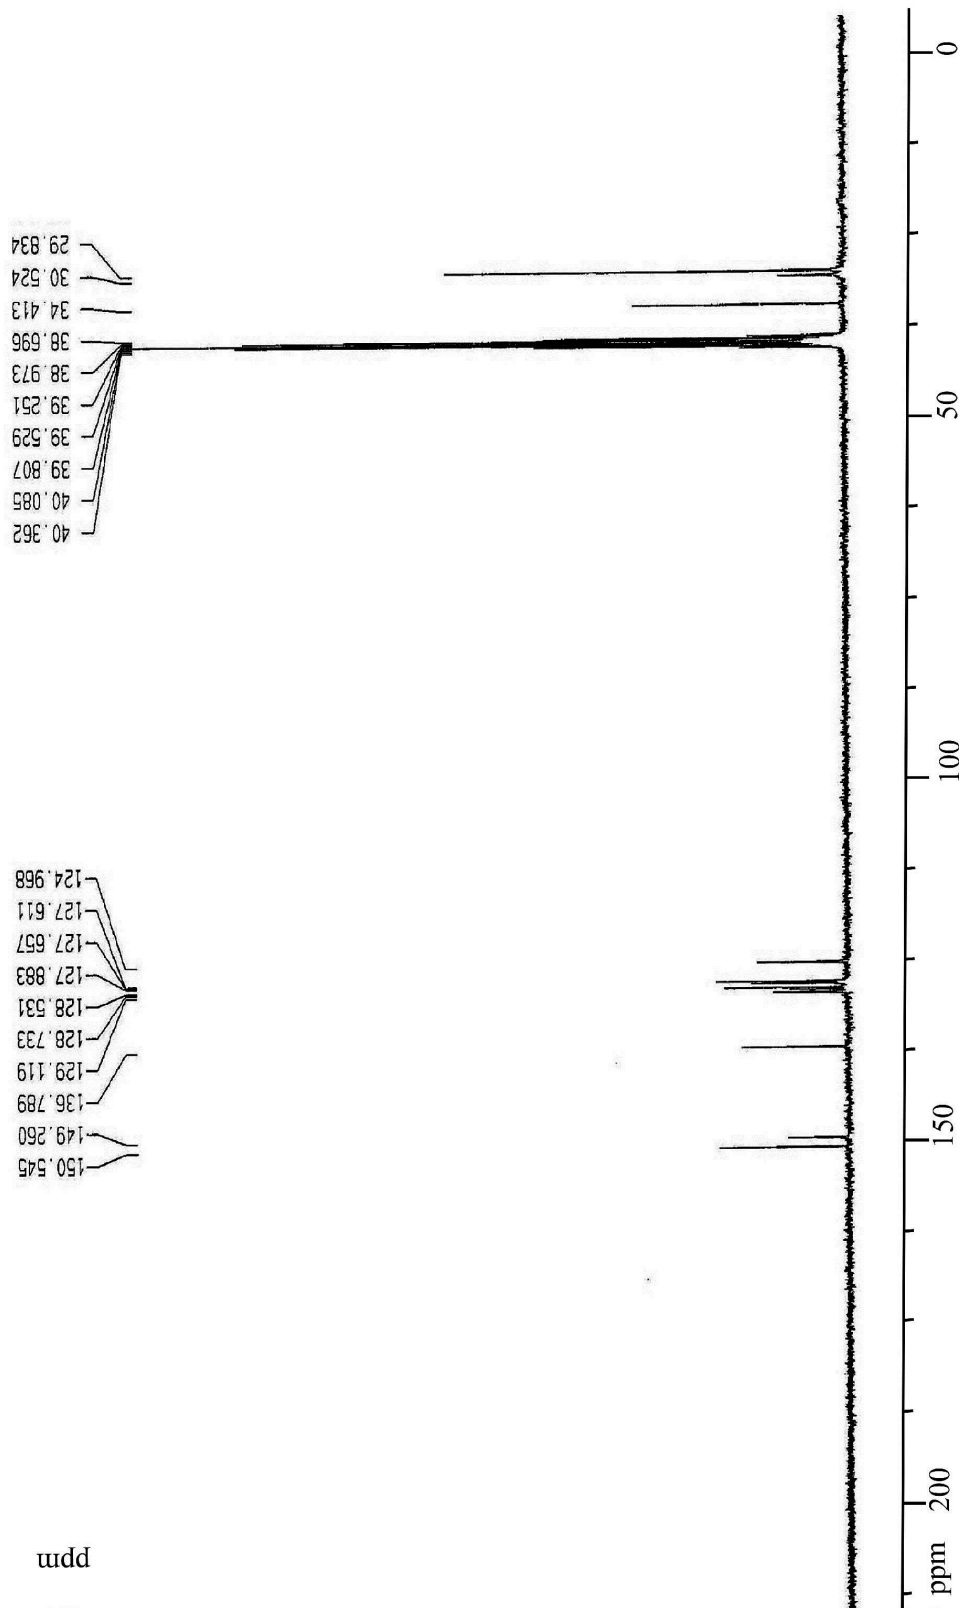

uudd

Copy of  $^1\text{H}$  NMR and  $^{13}\text{C}$  NMR of calix[4]arene derivatives

5,11,17,23-Tetramethylcalix[4]arene-25,26,27,28-tetraol (Compound D1)

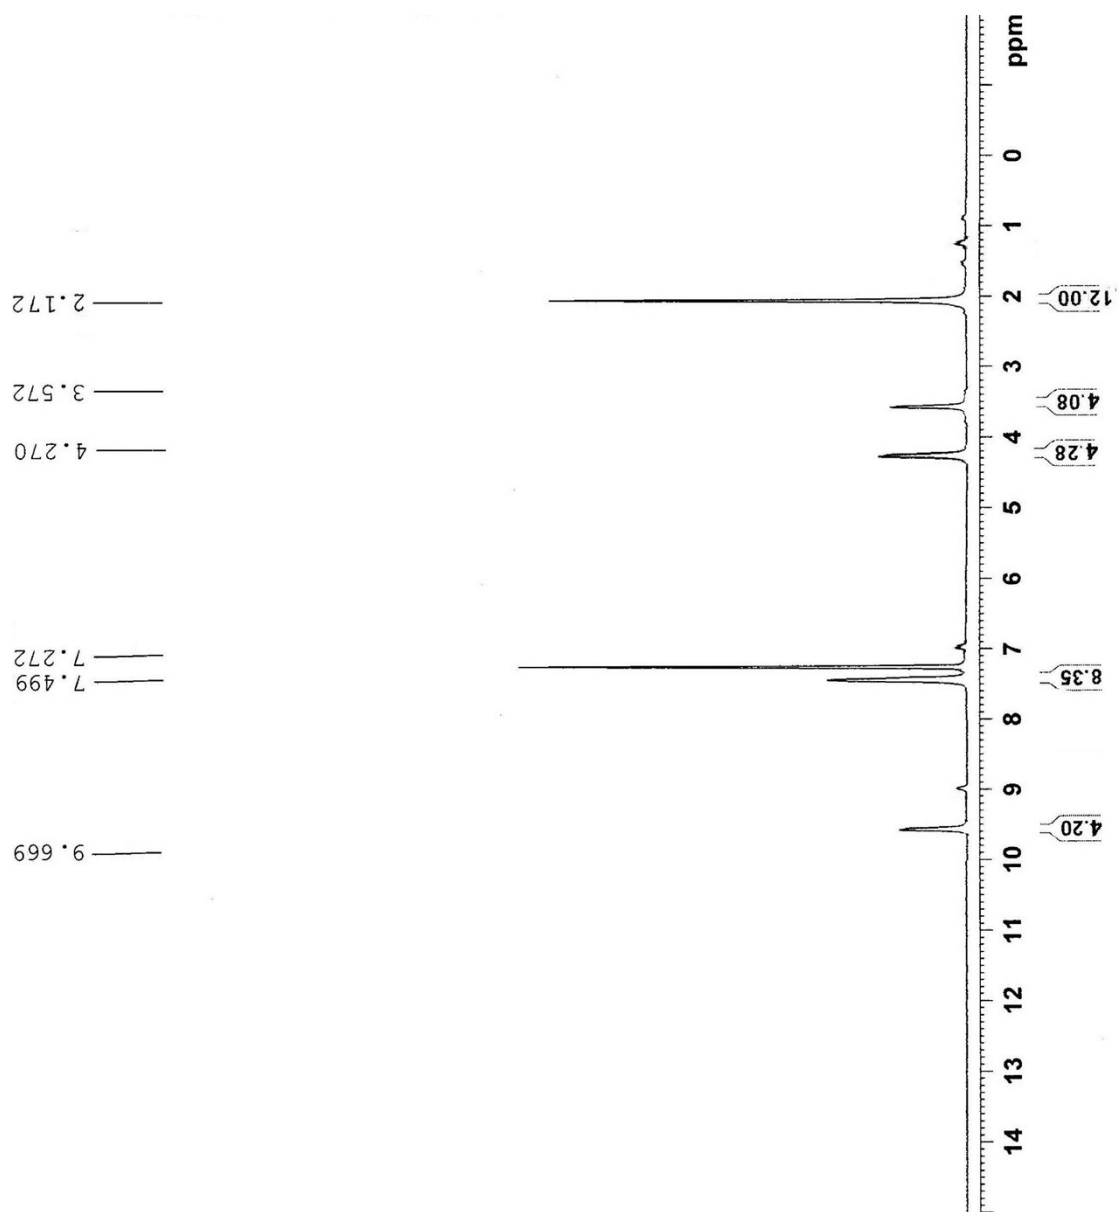

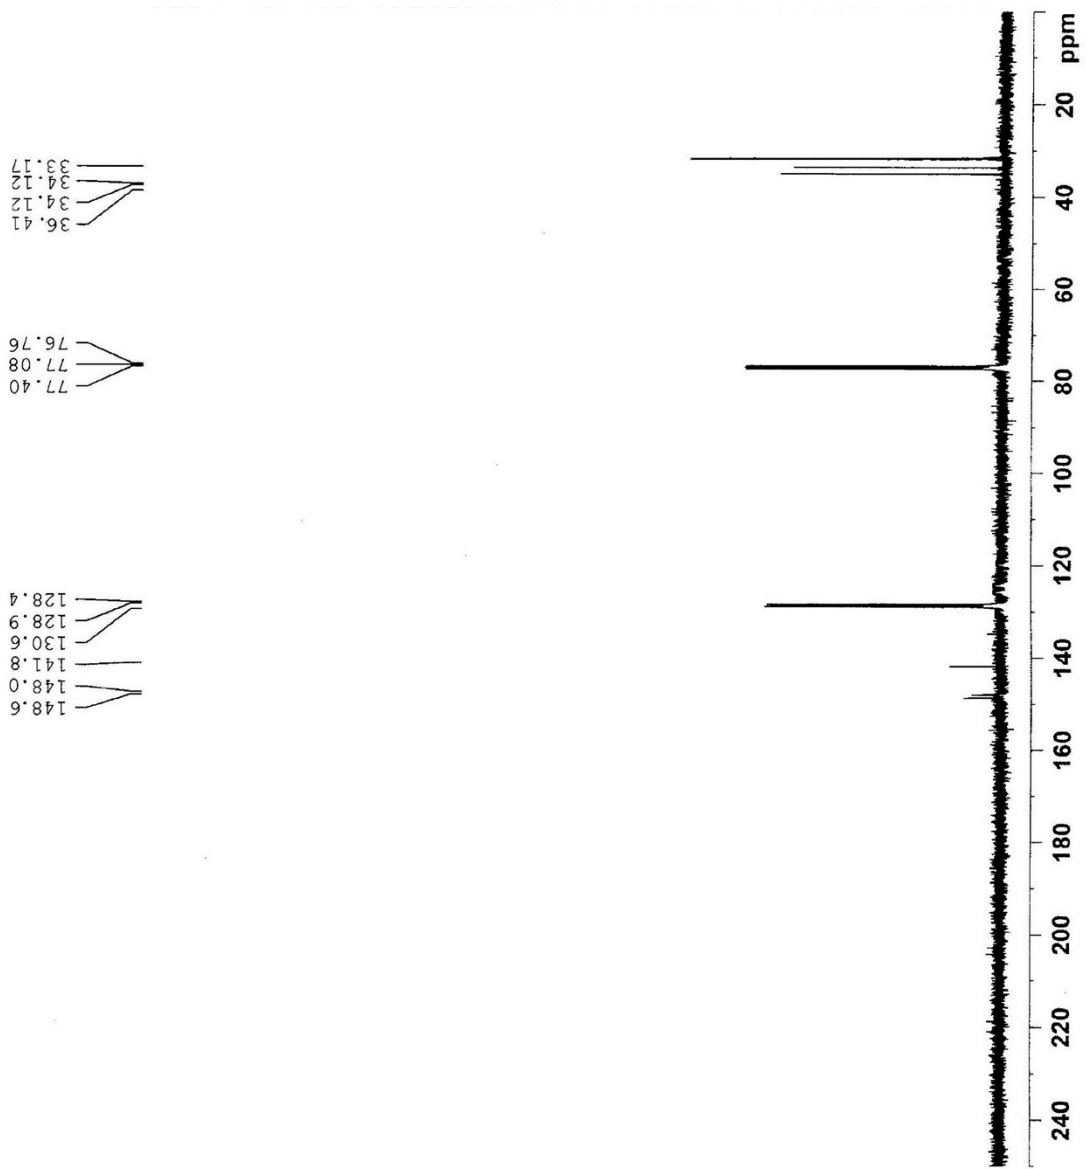

# Calix[4]arene-25,26,27,28-tetraol (Compound D2)

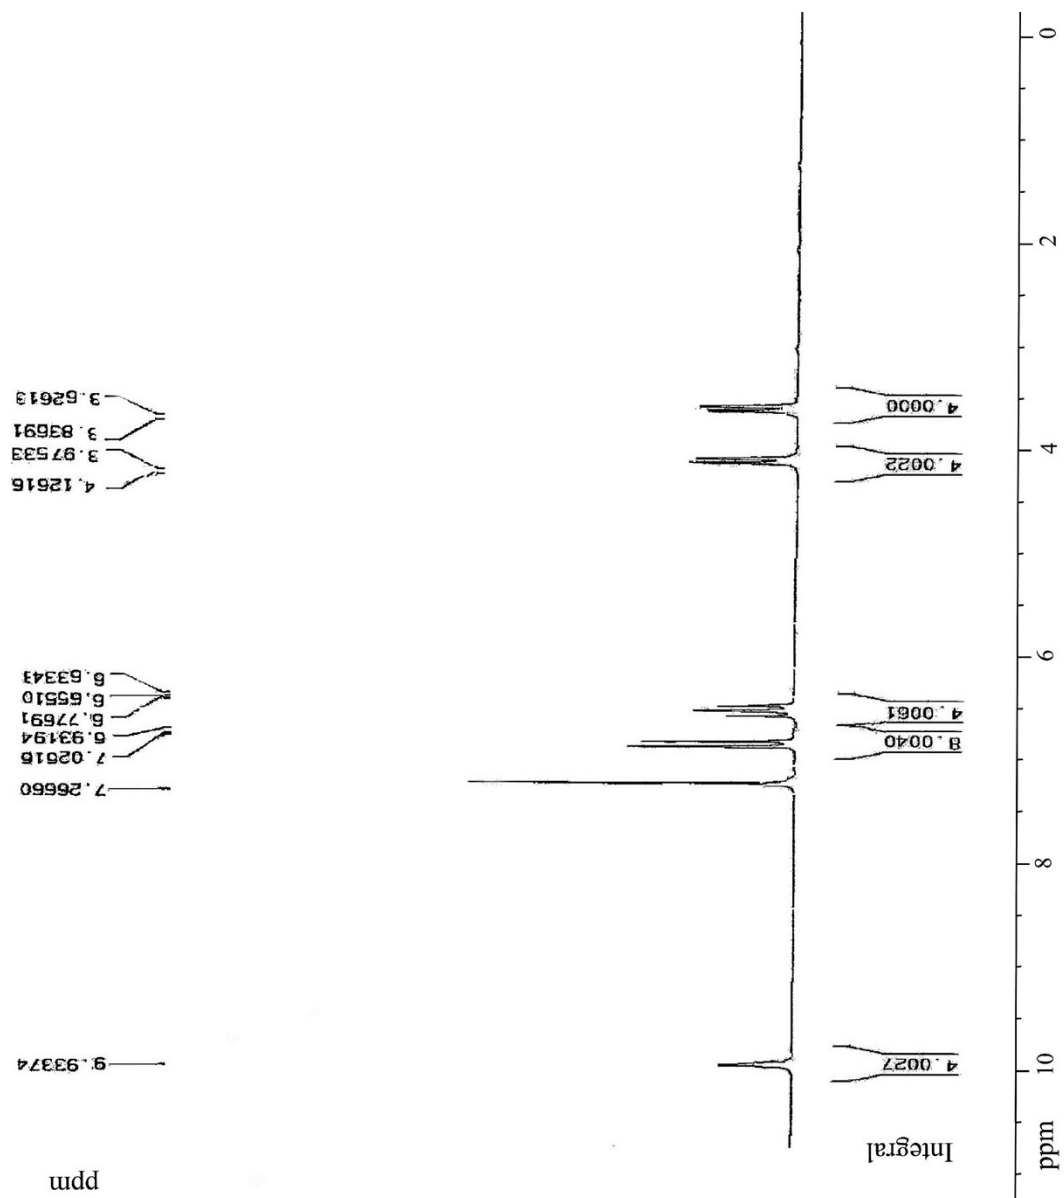



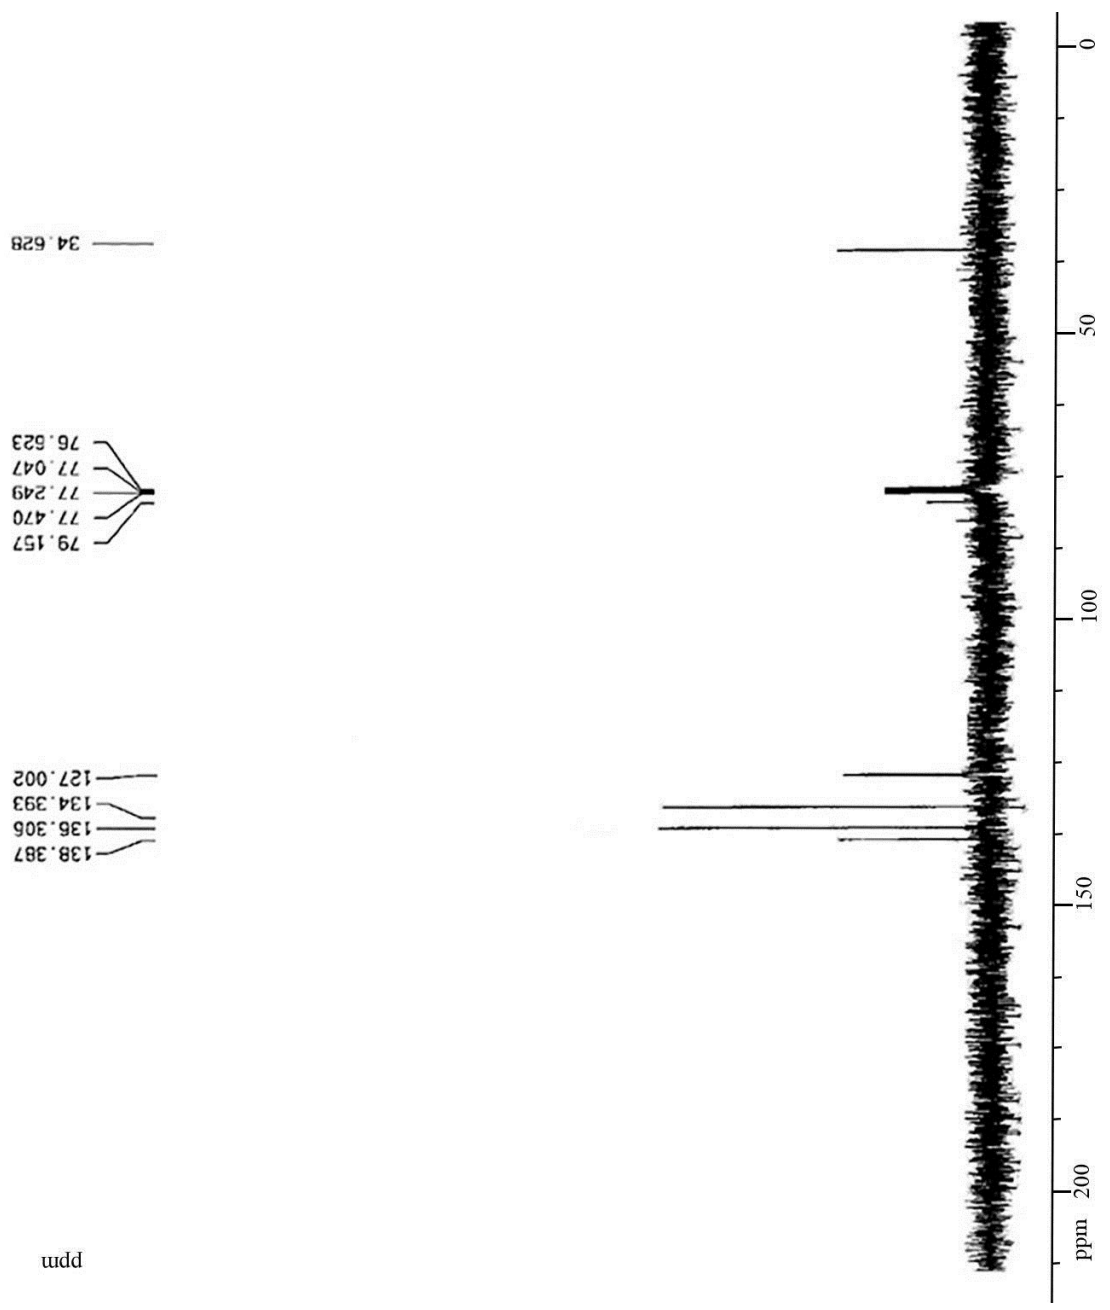

uidd

5,17-Dichloro-11,23-dimethylcalix[4]arene-25,26,27,28-tetraol (Compound D3)

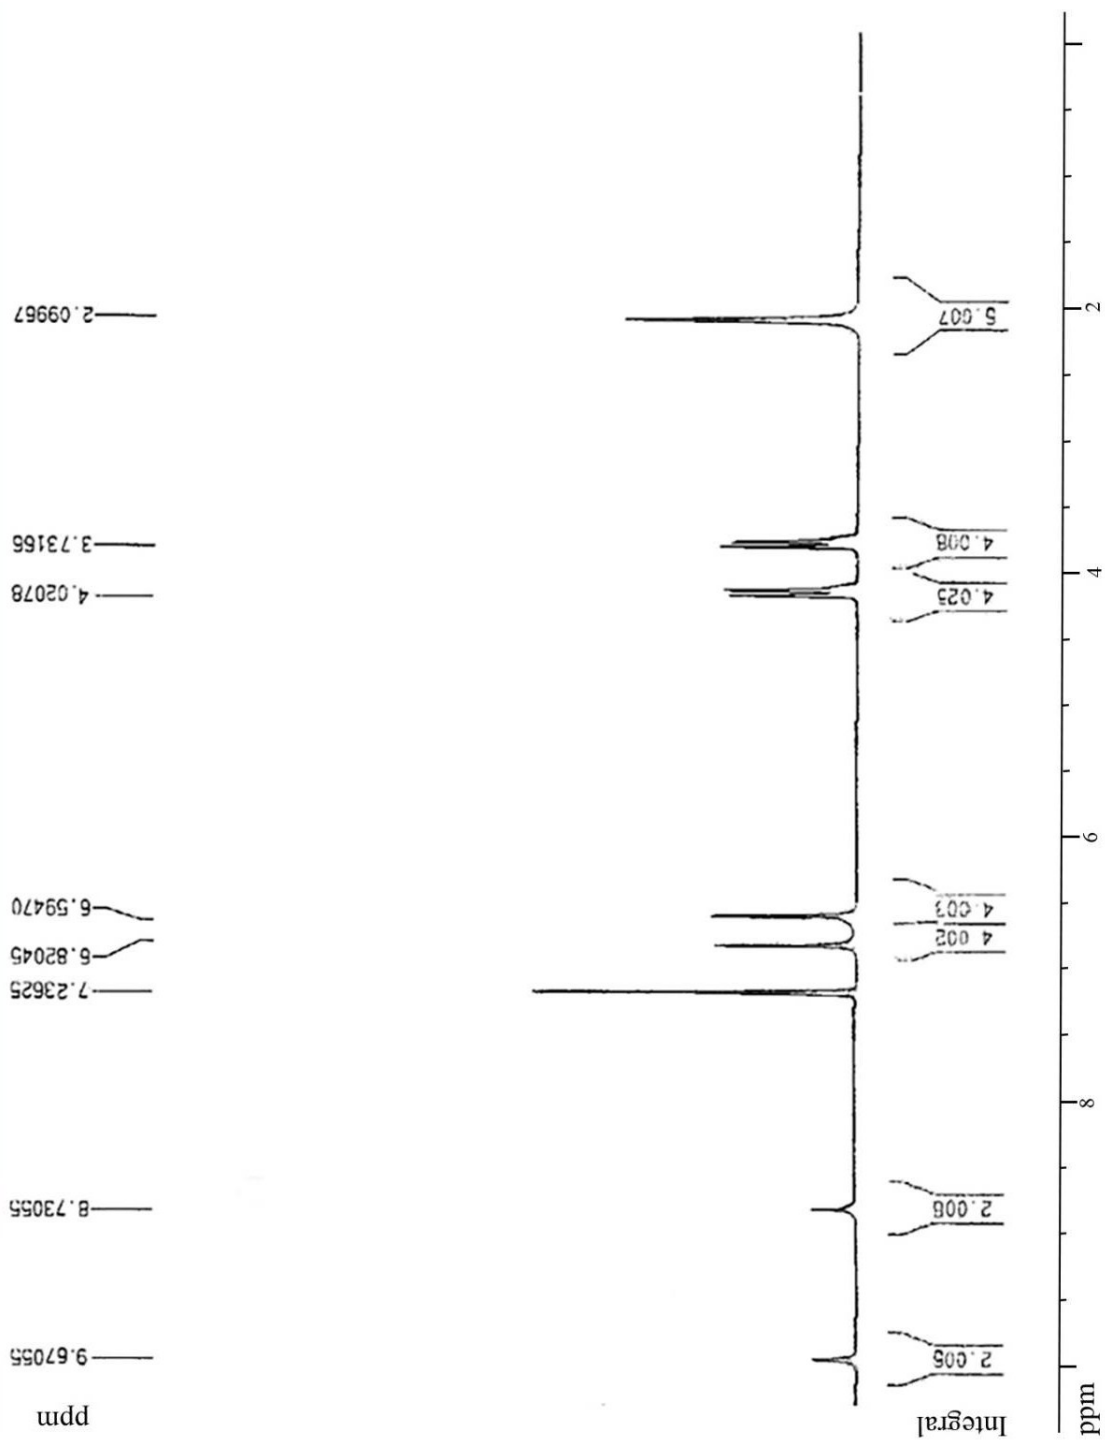

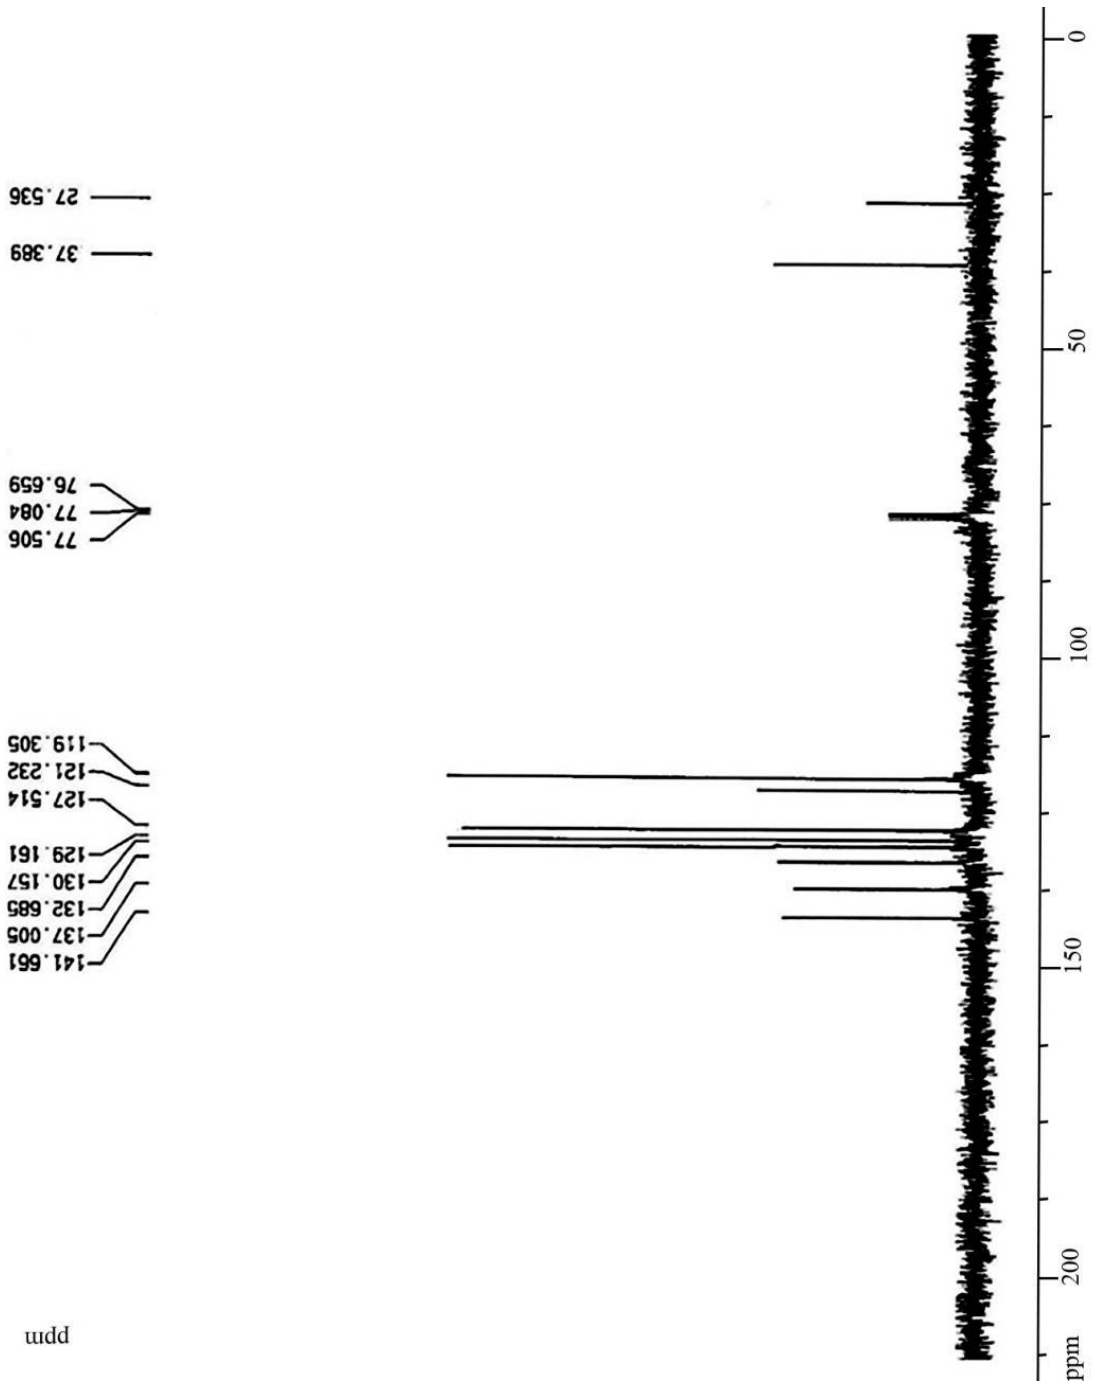

ppm

5,17-Dichloro-11,23-dihydroxycalix[4]arene-25,26,27,28-tetraol (Compound D4)

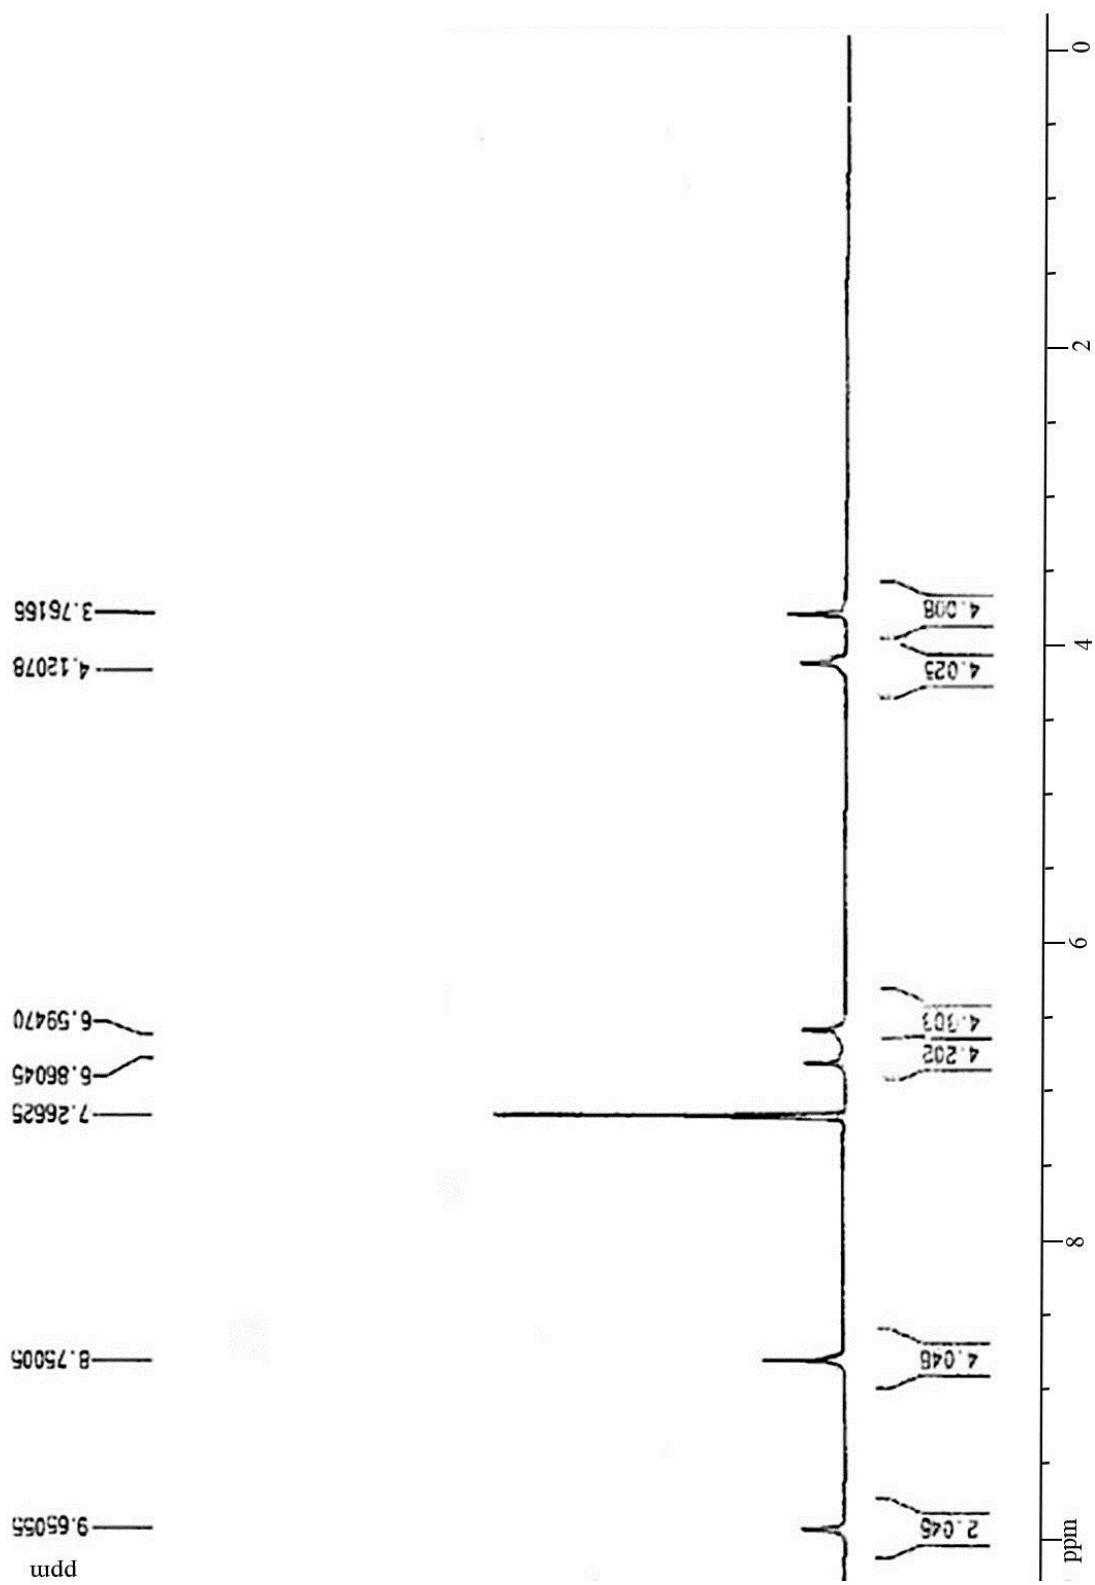

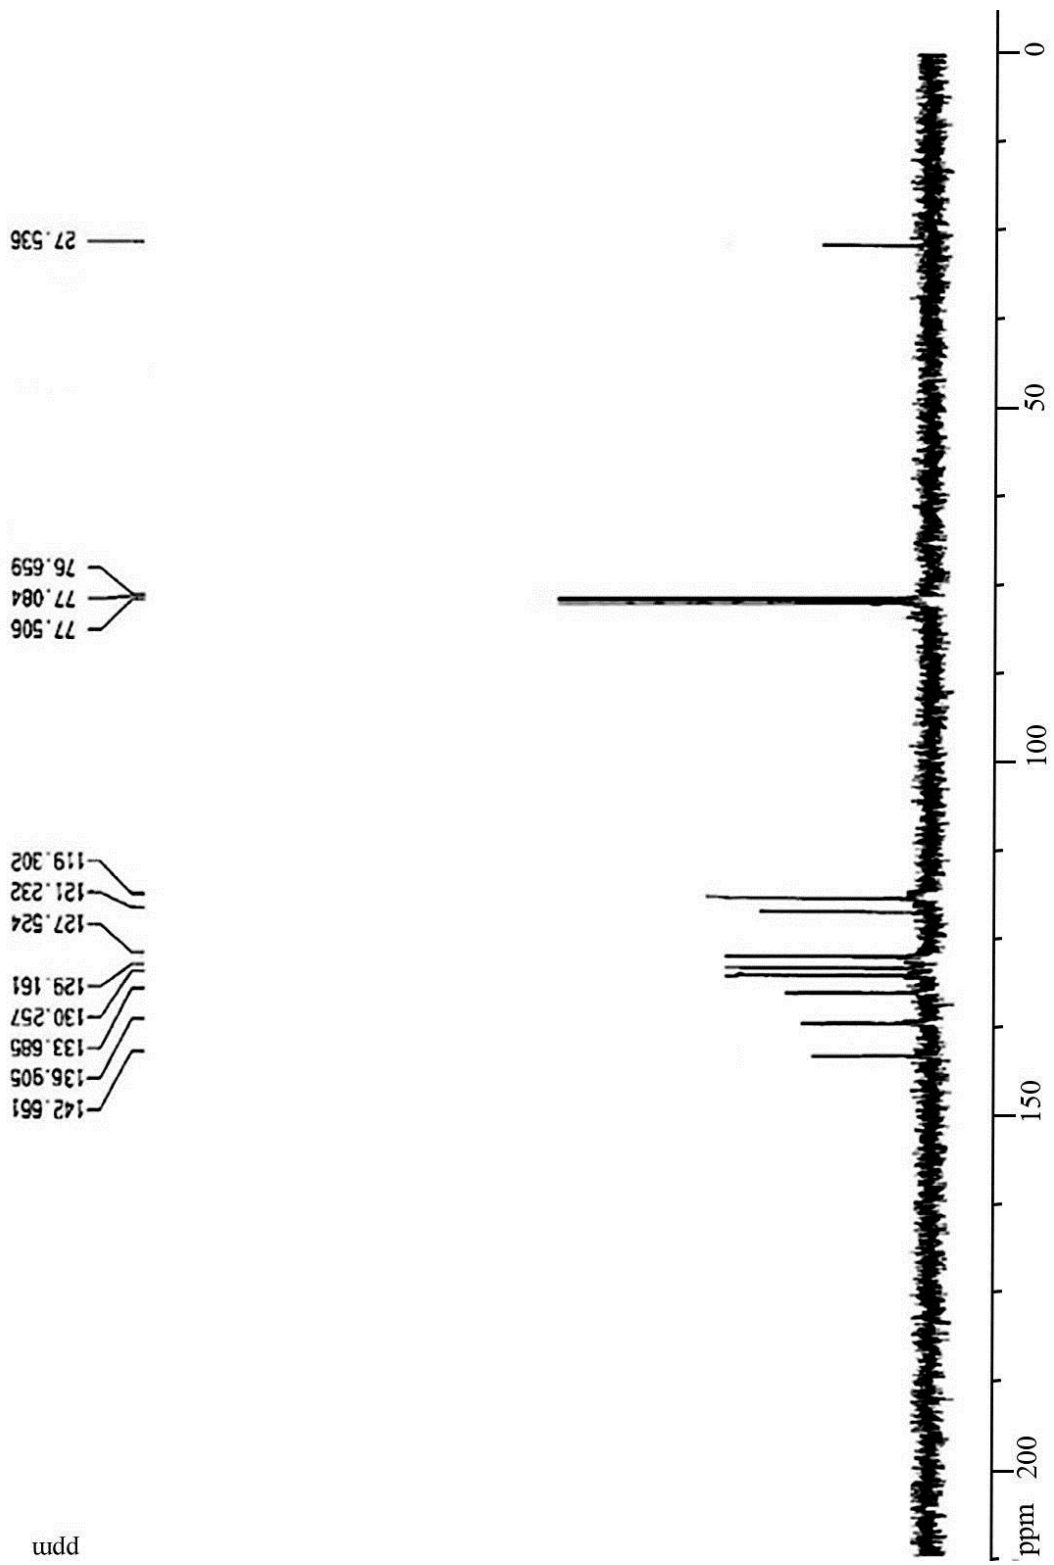

uidd

5,11,17,23-Tetra-*tert*-butylcalix[4]arene-25,26,27,28-tetraol (Compound D5)

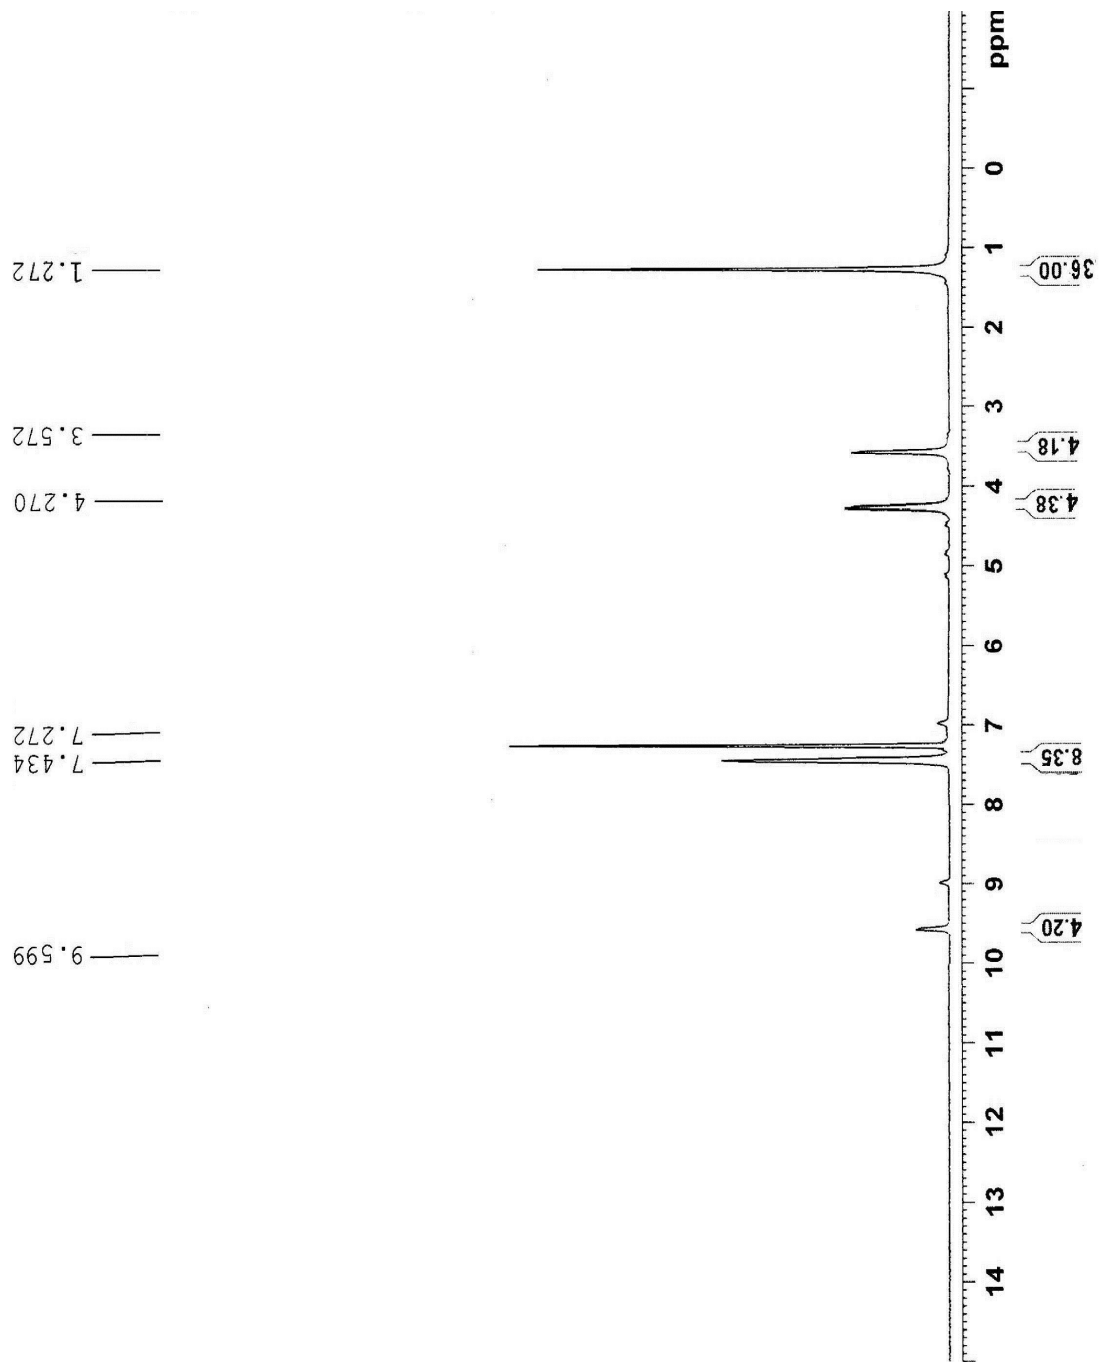

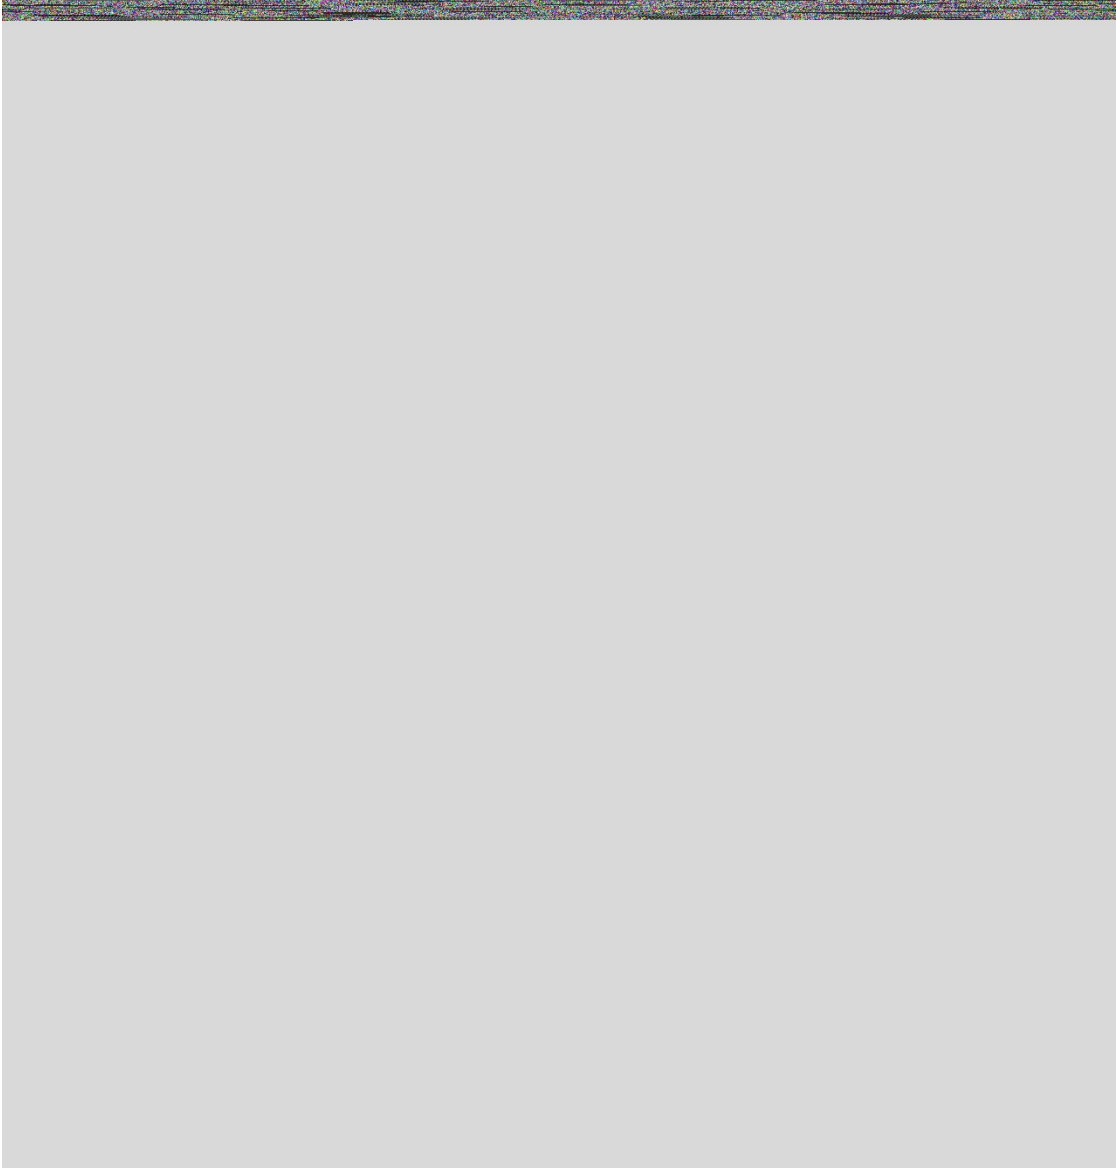

## References

- [1] Khalafi-Nezhad, A.; Soltani Rad, M. N.; Hakimelahi, G. H. *Helv. Chim. Acta* **2003**, *86*, 2396–2403.
- [2] Khalafi-Nezhad, A.; Parhami, A.; Bargebid, R.; Molazade, S.; Zare, A.; Foroughi, H. *Mol. Divers.* **2011**, *15*, 373–381.
- [3] Foster, H. M.; Hein, D. W. *J. Org. Chem.* **1961**, *26*, 2539–2541.
- [4] McGarry E J, Forsyth BA (1981) 2,6-Benzyl substituted phenols. U.S. Patent 4282390.
